# Supplementary material for: Patients’ subjective assessment of the duration of cataract surgery: a case series
Source: PubMed Central journal article supplement — BMJ Open. 2013 May 4;3(5):e002497. doi: 10.1136/bmjopen-2012-002497 (PMC3651974; doi:10.1136/bmjopen-2012-002497), 2013-05-04
Supplement: bmjopen-2012-002497.draft_revisions.pdf [file bmjopen-2012-002497.draft_revisions.pdf]

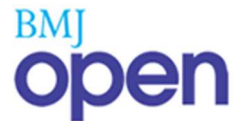

**Patients' subjective assessment of the duration of cataract surgery: A cohort study**

|                                 |                                                                                                                                                                                                                                                                                                                                                                                                                                                                                                                                                              |
|---------------------------------|--------------------------------------------------------------------------------------------------------------------------------------------------------------------------------------------------------------------------------------------------------------------------------------------------------------------------------------------------------------------------------------------------------------------------------------------------------------------------------------------------------------------------------------------------------------|
| Journal:                        | <i>BMJ Open</i>                                                                                                                                                                                                                                                                                                                                                                                                                                                                                                                                              |
| Manuscript ID:                  | bmjopen-2012-002497                                                                                                                                                                                                                                                                                                                                                                                                                                                                                                                                          |
| Article Type:                   | Research                                                                                                                                                                                                                                                                                                                                                                                                                                                                                                                                                     |
| Date Submitted by the Author:   | 14-Dec-2012                                                                                                                                                                                                                                                                                                                                                                                                                                                                                                                                                  |
| Complete List of Authors:       | Rothschild, Pierre-Raphaël; Hôpital Cochin, Université Paris Descartes, France, Ophtalmologie<br>Grabar, Sophie; Université Paris Descartes, Hôpital Cochin, Service de Biostatistique et Epidémiologie<br>Le Du, Brivael; Hôpital Cochin, Université Paris Descartes, France, Ophtalmologie<br>Temstet, Cyril; Hôpital Cochin, Université Paris Descartes, France, Ophtalmologie<br>Rostaqui, Olga; Hôpital Cochin, Université Paris Descartes, France, Ophtalmologie<br>Brezin, Antoine; Hôpital Cochin, Université Paris Descartes, France, Ophtalmologie |
| <b>Primary Subject Heading</b>: | Ophthalmology                                                                                                                                                                                                                                                                                                                                                                                                                                                                                                                                                |
| Secondary Subject Heading:      | Surgery, Patient-centred medicine, Medical education and training                                                                                                                                                                                                                                                                                                                                                                                                                                                                                            |
| Keywords:                       | Cataract and refractive surgery < OPHTHALMOLOGY, Medical Education, Treatment Surgery                                                                                                                                                                                                                                                                                                                                                                                                                                                                        |
|                                 |                                                                                                                                                                                                                                                                                                                                                                                                                                                                                                                                                              |

SCHOLARONE™  
Manuscripts

Subjective assessment of the duration of cataract surgery

1  
2  
3 **1 Patients' subjective assessment of the duration of cataract surgery: A**  
4  
5  
6 **2 cohort study**  
7  
8  
9  
10  
11

12 Pierre-Raphael Rothschild<sup>1</sup> MD, Sophie Grabar<sup>2</sup> MD, PhD, Brivael Le Dû<sup>1</sup> MD\*, Cyril  
13 Temstet<sup>1</sup> MD\*, Olga Rostaqui<sup>1</sup> MD, Antoine P. Brézin<sup>1</sup> MD, PhD.  
14

15 \* These 2 authors have equally contributed to this work  
16

17  
18 <sup>1</sup> Université Paris Descartes, Hôpital Cochin, Service d'Ophtalmologie, Assistance  
19 Publique Hôpitaux de Paris, 27 rue du faubourg Saint-Jacques, 75014 Paris, France.  
20

21  
22 <sup>2</sup> Université Paris Descartes, Hôpital Cochin, Service de Biostatistique et Epidémiologie,  
23 Assistance Publique Hôpitaux de Paris, 27 rue du faubourg Saint-Jacques, 75014 Paris,  
24 France.  
25  
26  
27  
28  
29

30  
31 **13 Dryad provisional DOI to the submission : doi:10.5061/dryad.27sk4**  
32

33 Keywords: cataract; surgical procedure; time perception; self-assessment  
34  
35  
36  
37

38 Presented in part at the ARVO meeting, Fort Lauderdale, Florida, USA, May 2012  
39  
40  
41

42 Word count: Abstract 298 words; text 2397 words, 25 references, 5 figures and tables  
43  
44  
45  
46

47 Corresponding author and address reprint requests to Antoine P. Brézin, MD, PhD.  
48

49 Université Paris Descartes, Service d'ophtalmologie, Hôpital Cochin, 27 rue du Faubourg  
50 Saint-Jacques, 75014 PARIS France, or at antoine.brezin@cch.aphp.fr  
51  
52

53 Phone: 33 - 1 58412200  
54

55 Fax: 33 - 1 58412210  
56  
57  
58  
59  
60

Subjective assessment of the duration of cataract surgery

1  
2  
3 26 **Article summary**  
4

5 27 **Article focus:**  
6

- 7 28 1. Modern cataract surgery is a safe and quick procedure. Nonetheless it remains a  
8  
9 29 stressful event from the patients' standpoint.  
10  
11 30 2. Several factors have been recognized to participate in patients' preoperative  
12  
13 31 anxiety and targeted preoperative counselling has been shown to be of value.  
14  
15 32 3. Though cataract surgery duration is a frequent patient preoperative qualm it has  
16  
17 33 not been properly studied and patient's perception of time is largely unknown.  
18  
19

20  
21 34 **Key messages:**  
22

- 23 35 1. Patients' perceived cataract surgery duration is rather good whatever the  
24  
25 36 circumstances.  
26  
27 37 2. We encourage cataract surgeons to monitor their surgery duration and inform  
28  
29 38 their patients accordingly.  
30  
31 39 3. Surgeons' experience and pain perception were the two factors independently  
32  
33 40 associated with surgery duration.  
34  
35  
36

37 41 **Strengths and limitations:**  
38

- 39 42 1. The large studied population and the strict definition used for operative time  
40  
41 43 provide reliable measurements of the surgery duration whether objective or  
42  
43 44 patient perceived.  
44  
45 46 2. Preoperative and intraoperative anxiety score evaluation was not part of our  
46  
47 47 standardized study protocol. This might have been associated with objective or  
48  
49 48 patient assessed surgery duration.  
50  
51 49  
52  
53  
54  
55  
56  
57  
58  
59  
60

Subjective assessment of the duration of cataract surgery

1  
2  
3 49 **Objectives:** Surgery duration is a source of preoperative anxiety for patients  
4  
5 50 undergoing cataract surgery. To better inform patients we evaluated the agreement  
6  
7 51 between objective and patient perceived surgery duration.  
8  
9  
10 52 **Design:** cohort study.  
11  
12 53 **Setting:** Public teaching university hospital (Paris, France).  
13  
14 54 **Participants** During the study period, 368 cataract surgery cases performed on 286  
15  
16 55 patients were included, 9 cases/patients were excluded from the final analysis. All cases  
17  
18 56 performed by phacoemulsification under topical anaesthesia were included. Cases for  
19  
20 57 which any adverse event prolonged the procedure by 10 minutes or more were  
21  
22 58 excluded.  
23  
24  
25 59 **Primary and secondary outcomes:** Procedures were timed (objective duration) and  
26  
27 60 patients were asked, immediately afterwards, to assess the duration of their surgery  
28  
29 61 (patient-assessed duration). The agreement between objective and patient-assessed  
30  
31 62 duration as well as influencing factors was studied.  
32  
33  
34 63 **Results:** Median objective duration (13.6 minutes) and patient-assessed duration (15  
35  
36 64 minutes) were significantly correlated (Pearson's  $r = 0.468$ ,  $P < .0001$ ). Furthermore,  
37  
38 65 Bland-Altman analysis and the intraclass correlation coefficient (0.44, 95%CI, 0.36-0.53)  
39  
40 66 showed a fair agreement. On univariate analysis senior-performed procedures were  
41  
42 67 significantly shorter (12.6 minutes) than those performed by juniors or residents, 18.2  
43  
44 68 and 17 minutes, respectively ( $P = .0001$ ). Pain was recorded as "no sensation" (29.5 % of  
45  
46 69 the cases), "mild sensation" (41%), "moderate pain" (25%), "intense pain" (3.9%) and  
47  
48 70 "unbearable pain" (0.6%). Groups with high pain-score had significantly longer  
49  
50 71 procedures ( $P < .00001$ ). Multivariate analysis revealed that the only independent  
51  
52 72 factors associated with both the objective and patient-assessed duration of surgery was  
53  
54 73 surgeon's experience and pain-score.  
55  
56  
57  
58  
59  
60

Subjective assessment of the duration of cataract surgery

1  
2  
3 74 **Conclusions:** Patients fairly estimated the duration of their surgery in our study,  
4  
5 75 suggesting that emotions associated with eye surgery under topical anesthesia did not  
6  
7 76 hinder patients' perception of time. We encourage cataract surgeons to monitor their  
8  
9  
10 77 own surgical duration to better inform their patients. The benefit of preoperative  
11  
12 78 counseling will need further evaluation by validated anxiety scales.  
13  
14  
15  
16  
17  
18  
19  
20  
21  
22  
23  
24  
25  
26  
27  
28  
29  
30  
31  
32  
33  
34  
35  
36  
37  
38  
39  
40  
41  
42  
43  
44  
45  
46  
47  
48  
49  
50  
51  
52  
53  
54  
55  
56  
57  
58  
59  
60

Subjective assessment of the duration of cataract surgery

1  
2  
3  
4  
5  
6  
7  
8  
9  
10  
11  
12  
13  
14  
15  
16  
17  
18  
19  
20  
21  
22  
23  
24  
25  
26  
27  
28  
29  
30  
31  
32  
33  
34  
35  
36  
37  
38  
39  
40  
41  
42  
43  
44  
45  
46  
47  
48  
49  
50  
51  
52  
53  
54  
55  
56  
57  
58  
59  
60

79 **INTRODUCTION**

80

81 The shortened duration of cataract surgery is one of the striking features owing to the  
82 improvement of surgical techniques. Live surgery events and real-time surgical video  
83 recordings by elite surgeons nowadays seldom show procedures lasting more than 10  
84 minutes. The quickness of modern cataract surgery by phacoemulsification has made  
85 topical anaesthesia, whose effects wear off faster than previously used peribulbar  
86 injections, the method of choice for analgesia.[1] Nevertheless, whatever the amount of  
87 trust patients put in their surgeon, many remain apprehensive of eye surgery under full  
88 consciousness or with minimal sedation by systemic administration of drugs. This  
89 apprehension is often focused on the fear of involuntary eye movements during the  
90 procedure, which may complicate the surgeon's task, on patients' fear of seeing their eye  
91 surgery or on the fear of painful sensations. In reply, quite abundant data are now  
92 available stemming from several studies focused on the impressions of patients during  
93 the procedures.[2 3] Various methods to assess the perception of pain have been used  
94 and have validated that cataract surgery under topical anaesthesia is by and large  
95 usually a painless procedure.[4] Visual sensations experienced by patients under the  
96 operating microscope have also been recorded and have mostly been found to be of no  
97 concern.[5 6] In addition to these topics, patients prior to their surgery have frequent  
98 qualms regarding the duration of the procedure and hence regarding their ability to  
99 withstand their eye surgery under topical anaesthesia.[7] Providing information to  
100 patients undergoing cataract surgery has been shown to relieve preoperative anxiety.[8]  
101 This information should include data regarding the duration of the procedure. However,  
102 surprisingly, in contrast to the common nature of cataract surgery by modern  
103 phacoemulsification, there is scarce data regarding its duration. The purpose of this

Subjective assessment of the duration of cataract surgery

1  
2  
3 104 study was therefore to compare the objective duration of cataract surgery with the  
4  
5 105 patients' subjective assessment of this duration.  
6  
7 106  
8  
9  
10  
11  
12  
13  
14  
15  
16  
17  
18  
19  
20  
21  
22  
23  
24  
25  
26  
27  
28  
29  
30  
31  
32  
33  
34  
35  
36  
37  
38  
39  
40  
41  
42  
43  
44  
45  
46  
47  
48  
49  
50  
51  
52  
53  
54  
55  
56  
57  
58  
59  
60

For peer review only

Subjective assessment of the duration of cataract surgery

1  
2  
3 107 **METHODS**  
4

5 108  
6 109 The study was set in the department of ophthalmology of Hôpital Cochin, a teaching  
7  
8 110 university hospital located in Paris, France. Data were collected prospectively in  
9  
10 111 consecutive patients operated between May 17, 2011 and July 22, 2011.  
12

13 112 All patients who had phacoemulsification under topical anaesthesia or sub-  
14  
15 113 Tenon's block with placement of an intraocular lens in the capsular bag were included.  
16  
17 114 The duration of the procedure, referred throughout the text as the objective duration,  
18  
19 115 was timed by operating room nurses as the exposure of the patients' eye to the light of  
20  
21 116 the operating microscope, from the beginning until the end of the surgery. Cases for  
22  
23 117 which any adverse event prolonged the procedure by 10 minutes or more were  
24  
25 118 excluded.  
26  
27

28  
29 119 The objective duration of surgery was compared to its subjective assessment  
30  
31 120 obtained by questioning patients immediately after drape removal and referred  
32  
33 121 throughout the text as the patient-assessed duration. If the initial patients' replies were  
34  
35 122 imprecise, a second line of questioning was used requesting patients to assess the  
36  
37 123 duration of their surgery by the minute. To avoid assessment biases, patients were not  
38  
39 124 warned before the surgery that they would be asked to assess the duration of their  
40  
41 125 procedure.  
42  
43

44  
45 126 The patients' perception of pain during surgery was also assessed with a  
46  
47 127 standard numeric scale, graded from 0 to 4: 0 (no pain), 1 (mild sensation), 2 (moderate  
48  
49 128 pain), 3 (intense pain), 4 (unbearable pain) as previously used in other studies.[4 9 10]  
50

51 129 Other factors were also recorded: age, gender, first or second eye surgery, and  
52  
53 130 best corrected preoperative visual acuity. All surgeries were performed between 8:00  
54  
55 131 AM and 2:00 PM and the patients were requested to fast from midnight on the night  
56  
57  
58  
59  
60



Subjective assessment of the duration of cataract surgery

1  
2  
3 132 prior to their surgery. The patients' preoperative schedules were recorded: duration of  
4  
5 133 fasting, time interval between wake-up and surgery, time interval between entry in the  
6  
7 134 department suite and surgery (waiting time in the department). All patients received 0.5  
8  
9  
10 135 mg/kg of hydroxyzine at their time of arrival in our department used as sedative and  
11  
12 136 additive sedation during the surgery when necessary. The need for additional  
13  
14 137 anaesthetic techniques was recorded.

15  
16  
17 138 Eight surgeons participated in the study. Surgeons were categorized as seniors  
18  
19 139 when they had the experience of more than 1000 procedures performed prior to the  
20  
21 140 study or as juniors otherwise. Procedures performed by residents (either partially or  
22  
23 141 fully) for teaching purposes were also distinctly analyzed.

24  
25  
26 142 Three phacoemulsifiers were used: Infiniti® (Alcon, Inc), Stellaris® (Bausch &  
27  
28 143 Lomb, USA) and Whitestar Signature® (Abbott Medical Optics Inc., Santa Anna, USA).

29  
30 144

### 31 32 145 **Statistical analysis**

33 146 Categorical variables are expressed as numbers (percentages) and comparisons were  
34  
35  
36 147 conducted using the Fisher-exact test. For continuous variables, mean  $\pm$  standard  
37  
38 148 deviation (SD) or median (interquartile range, IQR) are provided, and comparisons were  
39  
40 149 conducted using the Kruskal-Wallis test.

41  
42  
43 150 To evaluate the agreement between objective and patient-assessed duration, a Bland-  
44  
45 151 Altman plot was used.[11] The differences between the two methods (i.e. objective and  
46  
47 152 patient-assessed duration) are plotted against their mean. The Bland-Altman analysis  
48  
49 153 provides the mean difference (also called bias) as well as the limit of agreement  
50  
51 154 corresponding to the 95% confidence interval (CI) of the mean difference. When  
52  
53 155 agreement between the two methods is good, most of the differences should reside

Subjective assessment of the duration of cataract surgery

1  
2  
3 156 within the agreement limit interval. We also computed the Intraclass correlation  
4  
5 157 coefficient to quantitatively evaluate the agreement.  
6

7 158 Correlation tests were conducted using the Pearson's correlation coefficient ( $r$ ). Factors  
8  
9  
10 159 with  $P$  values  $<.10$  in the univariate analysis were included in a multivariate model  
11  
12 160 (ANCOVA) to determine the independent factors associated with either objective or  
13  
14 161 patient-assessed surgery duration.  $P$  Values  $<0.05$  were considered significant. All  
15  
16 162 analyses were performed with XLSTAT 2012.2.02 software (Addinsoft, Paris, France).  
17

18  
19 163  
20  
21  
22  
23  
24  
25  
26  
27  
28  
29  
30  
31  
32  
33  
34  
35  
36  
37  
38  
39  
40  
41  
42  
43  
44  
45  
46  
47  
48  
49  
50  
51  
52  
53  
54  
55  
56  
57  
58  
59  
60

Subjective assessment of the duration of cataract surgery

1  
2  
3 164 **RESULTS**

4 165  
5 166 A total of 359 cases performed in 277 patients was analyzed after exclusion of 9 cases  
6  
7 167 for intraoperative adverse event including posterior capsular break or zonular  
8  
9 168 disinsertion (8 cases) and phacoemulsifier breakdown (1 case). Five out the 8 cases  
10  
11 169 presenting intraoperative vitreous loss had an identifiable risk factor for this  
12  
13 170 complication, two were traumatic cataracts, two were cataracts related to severe  
14  
15 171 pseudoexfoliation syndrome and one was a resident-performed procedure.  
16  
17 172 Characteristics of the study population, patients' schedule on the day of surgery,  
18  
19 173 sequence of procedures, phacoemulsifiers used and surgery duration are shown in table  
20  
21 174 1.  
22  
23  
24

25 175 Topical anaesthesia alone was used in 350 cases, the remaining cases required  
26  
27 176 the addition of sub-Tenon's block (2 cases), sub-conjunctival injection (1 case),  
28  
29 177 intracameral injection of lidocaine (1 case) and midazolam intravenous sedation (5  
30  
31 178 cases). No sensation was reported in 106 (29.5%) cases, a mild sensation in 147 (41%)  
32  
33 179 cases, moderate pain in 90 (25%) cases, intense pain in 14 (3.9%) cases and unbearable  
34  
35 180 pain in 2 (0.6%) cases. The perception of pain did not significantly differ between first  
36  
37 181 and second eye procedures ( $p=0.34$ ).  
38  
39

40  
41 182 **Comparison between objective and patient-assessed duration**

42  
43 183 The median objective surgery duration was 13.6 minutes (interquartile range 11.1 to  
44  
45 184 17.5 minutes) and the median patient-assessed duration was 15 minutes (interquartile  
46  
47 185 range 11 to 20 minutes). Bland-Altman plot showed a fair agreement between the  
48  
49 186 objective and patient-assessed duration (fig 1). Mean difference (or bias) was only 0.92  
50  
51 187 minute (95% CI, 0.22-1.62 minute). However an agreement worsening was noted for  
52  
53 188 longer procedures but error was equally distributed over and under the limits of  
54  
55 189 agreement (12.3-14.2 minutes). Intraclass correlation coefficient was 0.44 (95% CI,  
56  
57  
58  
59  
60

Subjective assessment of the duration of cataract surgery

1  
2  
3 190 0.36-0.53) further suggesting a fair agreement between the objective and patient-  
4  
5 191 assessed duration.

6  
7 192 A significant correlation between the objective and patient-assessed duration of the  
8  
9 193 surgery was observed (Pearson's  $r = 0.468$ ,  $p < 0.0001$ ).

#### 194 **Factors associated with objective surgery duration**

14 195 On univariate analysis, objective surgery duration was significantly correlated to  
15  
16 196 preoperative VA ( $p = 0.0004$ ), duration of fasting ( $p = 0.014$ ), time interval between wake-  
17  
18 197 up and surgery ( $p = 0.0004$ ), and waiting time in the department ( $p < 0.0001$ ). The  
19  
20 198 corresponding Pearson's correlation coefficients are provided in table 2. Similarly,  
21  
22 199 objective duration was significantly different according to surgeon experience with  
23  
24 200 shorter procedures for seniors (12.6 minutes) compared to juniors or residents, 18.2  
25  
26 201 and 17 minutes respectively (fig 2). The two latter durations were not significantly  
27  
28 202 different ( $p = 0.70$ ). Objective duration was significantly different according to pain-score  
29  
30 203 group with significantly longer procedures in groups with higher pain-scores (fig 3).  
31  
32 204 Conversely, objective duration was not significantly different between first and second  
33  
34 205 eye procedures or according to gender ( $p = 0.365$  and  $p = 0.925$ , respectively).

35  
36  
37  
38  
39 206 Multivariate analysis revealed patient preoperative visual acuity, waiting time in  
40  
41 207 the department, surgeon experience and pain-score group to be independent factors  
42  
43 208 associated with objective surgery duration (table 2).

#### 209 **Factors associated with patient-assessed surgery duration**

44  
45  
46  
47  
48 210 On univariate analysis, patient-assessed surgery duration was correlated to patient age  
49  
50 211 ( $p = 0.010$ ), time interval between wake-up and surgery ( $p = 0.012$ ), and waiting time in  
51  
52 212 the department ( $p < 0.029$ ). The corresponding Pearson's correlation coefficients are  
53  
54 213 provided in table 2.

Subjective assessment of the duration of cataract surgery

1  
2  
3 214 Similarly, patient-assessed duration was also significantly different according to surgeon  
4  
5 215 experience ( $p=0.0001$ ) and according to pain-score group ( $p=0.0002$ ). Conversely,  
6  
7 216 patient-assessed duration was not significantly different between first and second eye  
8  
9 217 procedures or according to gender ( $p=0.340$  and  $p=0.298$ , respectively).

11 218 Multivariate analysis revealed patient age, surgeon experience and pain-score  
12  
13 219 group to be independent factors associated with patient-assessed surgery duration  
14  
15 220 (table 2).  
16  
17  
18  
19  
20  
21  
22  
23  
24  
25  
26  
27  
28  
29  
30  
31  
32  
33  
34  
35  
36  
37  
38  
39  
40  
41  
42  
43  
44  
45  
46  
47  
48  
49  
50  
51  
52  
53  
54  
55  
56  
57  
58  
59  
60

Subjective assessment of the duration of cataract surgery

222 **DISCUSSION**

223  
224 Our study showed that patients overall fairly estimated the duration of their surgery and  
225 that the two independent factors associated with both the objective and subjective  
226 surgery duration were surgeon's experience and pain-score.

227 The objective duration of cataract surgery by modern phacoemulsification has  
228 not been the main outcome measure of previous studies, but has occasionally been  
229 assessed mainly in analyzes of the effects of teaching or as a secondary outcome. [12 13]  
230 When reported, the duration of surgery ranged from an average of 30 minutes in studies  
231 published in 2003 to 15-19 minutes in more recent reports.[14-17] This shortening  
232 most probably stems from improvements in the technique of cataract surgery, including  
233 suture less clear corneal micro incisions. Our objective measure of procedures lasting  
234 13.6 minutes (median duration) was longer than observed in the hands of some elite  
235 cataract surgeons. Yet, our measures included procedures performed partially or  
236 completely by residents and by junior surgeons. As shown previously, our data  
237 confirmed that experienced surgeons are quicker than more junior ophthalmologists.[12  
238 13] In our study, the surgeon's experience factor was independently associated with  
239 both the objective and subjective surgery duration.

240 The subjective perception of time by patients undergoing cataract surgery under  
241 topical anaesthesia has never been studied either. Preparations for surgery include the  
242 testing of phacoemulsifiers, applying topical anaesthesia, preoperative disinfection of  
243 the eye by povidone-iodine, draping and placement of a lid speculum. These steps may  
244 take as long as the surgical procedure itself or even in some instances may take longer  
245 than the surgery. From the patients' perspective distinguishing these preoperative  
246 stages from their surgery per se may be difficult. To minimize this bias when seeking our  
247 patients' subjective assessment of the duration of their surgery, we specifically asked for

## Subjective assessment of the duration of cataract surgery

1  
2  
3 248 their impression of the elapsed time between the illumination of their eye under the  
4  
5 249 operating microscope until the removal of the drapes. However, this time interval both  
6  
7 250 subjectively assessed and clocked by nurses may have added approximately 1 or 2 extra  
8  
9  
10 251 minutes to the real time of the surgery, as the surgeons adjusted the focus of the  
11  
12 252 microscope and made their final preparations for the procedure.

14 253 The assessment of pain was a secondary outcome measure in our study and we  
15  
16 254 used the simple 5-step scale as validated in other studies.[4 9 10] A lack of sensation or a  
17  
18 255 mild sensation were reported in 70.2% of cases, moderate pain in 25.4% cases and  
19  
20  
21 256 intense or even unbearable pain in 4.4% of cases. These percentages are comparable to  
22  
23 257 previous reports using the same 5-step pain-score scale.[9] Unsurprisingly, the  
24  
25  
26 258 perception of pain was correlated with the duration of procedures. In our study, the  
27  
28 259 pain-score group was independently associated with both the objective and subjective  
29  
30 260 surgery duration. In some previous studies patients tended to report their second eye  
31  
32 261 surgery as more painful than their first eye.[16] However, this finding was not observed  
33  
34 262 in our study, nor in another recent report.[18]

36  
37 263 Preoperative standardized grading of cataracts was not performed in our study.  
38  
39 264 Patient age may however be used as a surrogate parameter influencing the grade of the  
40  
41 265 cataract.[19 20] In nuclear cataracts preoperative visual acuity may also be correlated to  
42  
43 266 its grade.[21] Our data confirmed that the objective duration of surgery was longer in  
44  
45 267 cases with worse preoperative visual acuity, as more advanced cataracts require a  
46  
47  
48 268 longer duration of ultrasonic power release.[22] Surprisingly patient's age was not  
49  
50 269 correlated with objective surgery duration but instead with patient-assessed surgery  
51  
52 270 duration. The chop technique may result in quicker procedures, however the evaluation  
53  
54  
55 271 of the effect of surgical techniques on the duration of surgery was not within the scope  
56  
57 272 of our study.[23]

## Subjective assessment of the duration of cataract surgery

1  
2  
3 273 As the majority of patients quite correctly assessed the duration of their surgery,  
4  
5 274 we were not able to identify specific characteristics significantly associated with an  
6  
7 275 underestimation or an overestimation of time. Although evidence suggests that fasting  
8  
9  
10 276 prior to cataract surgery under topical anaesthesia can be abandoned, in this series  
11  
12 277 patients fasted from midnight on the day prior to their surgery.[24] As our patients were  
13  
14 278 operated from 8:00 AM to 2:00 PM, fasting time varied from one case to another, but  
15  
16 279 these variations did not influence the subjective assessment of the duration of surgery.  
17  
18 280 Similarly, we thought that an early arrival and a subsequent long waiting in the  
19  
20  
21 281 department of ophthalmology prior to entry in the operating room could be a factor of  
22  
23 282 stress resulting in an over-assessment of the duration of their surgery by patients. Yet  
24  
25 283 our analysis did not reveal that this factor played any role. We unexpectedly observed  
26  
27  
28 284 that the duration of fasting and the time interval between wakeup and surgery, as well  
29  
30 285 as waiting time in the department, were associated with longer procedures. This might  
31  
32 286 have been linked to surgeons slowing down after a number of cases and/or a trend to  
33  
34 287 schedule teaching cases at the end rather than at the beginning of surgical sessions.  
35  
36  
37 288 Although it has been suggested that handholding may reduce anxiety and the perception  
38  
39 289 of pain during cataract surgery, this was not applied in our practice.[25]

40  
41 290 Our study showed that patients overall fairly estimated the duration of their  
42  
43 291 surgery. The trend in the past decades has been towards a constant reduction of the  
44  
45 292 duration of procedures in eye surgery. As new technical improvements are under way,  
46  
47  
48 293 such as femtosecond laser-assisted cataract surgery, the fact that patients are rather  
49  
50 294 acutely aware of the duration of procedures must be taken into consideration as an  
51  
52  
53 295 important parameter for their comfort.

54  
55 296  
56  
57  
58  
59  
60



Subjective assessment of the duration of cataract surgery

297 **Acknowledgments**

298 Jean-Baptiste Daudin, MD and Dominique Monnet MD, PhD provided and cared for study  
299 patients.

300 **Funding**

301 The study was supported by the Association d'Ophtalmologie de Cochin, Paris, France

302 **Competing interests**

303 The authors have no conflict of interest related to results presented in this study.

304

305 **Contributorship Statement**

306 Only the below listed authors qualify for authorship according to the ICMJE criteria:

307 Pierre-Raphael Rothschild substantially participated in the following:

- 308 1) conception and design, acquisition of data, and analysis and interpretation of data
- 309 2) drafting the article and revising it critically for important intellectual content
- 310 3) final approval of the version to be published

311 Sophie Grabar substantially participated in the following:

- 312 1) conception and design, and analysis and interpretation of data
- 313 2) drafting the article and revising it critically for important intellectual content
- 314 3) final approval of the version to be published

315

316 Brivael Le Dû substantially participated in the following:

- 317 1) conception and design, acquisition of data, and analysis and interpretation of data
- 318 2) drafting the article and revising it critically for important intellectual content
- 319 3) final approval of the version to be published

320

321 Cyril Temstet substantially participated in the following:

1 Subjective assessment of the duration of cataract surgery

2  
3 322 1) conception and design, acquisition of data, and analysis and interpretation of data

4  
5 323 2) drafting the article and revising it critically for important intellectual content

6  
7 324 3) final approval of the version to be published

8  
9 325

10  
11 326 Olga Rostaqui substantially participated in the following:

12  
13 327 1) conception and design, acquisition of data

14  
15 328 2) drafting the article and revising it critically for important intellectual content

16  
17 329 3) final approval of the version to be published

18  
19 330

20  
21 331 Antoine P. Brézin substantially participated in the following:

22  
23 332 1) conception and design, acquisition of data, and analysis and interpretation of data

24  
25 333 2) drafting the article and revising it critically for important intellectual content

26  
27 334 3) final approval of the version to be published

28  
29 335

30  
31 336 **Data Sharing**

32  
33 337

34  
35 338 Extra data can be accessed via the Dryad data repository at <http://datadryad.org/> with the

36  
37 339 doi:10.5061/dryad.27sk4

38  
39  
40  
41  
42  
43  
44  
45  
46  
47  
48  
49  
50  
51  
52  
53  
54  
55  
56  
57  
58  
59  
60

Subjective assessment of the duration of cataract surgery

1  
2  
3 340 **REFERENCES**

- 4 341
- 5 342 1. Leaming DV. Practice styles and preferences of ASCRS members--2003 survey. J  
6  
7 343 Cataract Refract Surg 2004;**30**:892-900
- 8  
9 344 2. Fagerstrom R. Fear of a cataract operation in aged persons. Psychol Rep  
10  
11 345 1993;**72**:1339-46
- 12  
13 346 3. Nijkamp MD, Kenens CA, Dijker AJ, et al. Determinants of surgery related anxiety in  
14  
15 347 cataract patients. Br J Ophthalmol 2004;**88**:1310-4
- 16  
17 348 4. Davison M, Padroni S, Bunce C, et al. Sub-Tenon's anaesthesia versus topical  
18  
19 349 anaesthesia for cataract surgery. Cochrane Database Syst Rev 2007(3):CD006291
- 20  
21 350 5. Newman DK. Visual experience during phacoemulsification cataract surgery under  
22  
23 351 topical anaesthesia. Br J Ophthalmol 2000;**84**:13-5
- 24  
25 352 6. Yaylali V, Yildirim C, Tatlipinar S, et al. Subjective visual experience and pain level  
26  
27 353 during phacoemulsification and intraocular lens implantation under topical  
28  
29 354 anesthesia. Ophthalmologica 2003;**217**:413-6
- 30  
31 355 7. Nijkamp MD, Ruiters RA, Roeling M, et al. Factors related to fear in patients undergoing  
32  
33 356 cataract surgery: a qualitative study focusing on factors associated with fear and  
34  
35 357 reassurance among patients who need to undergo cataract surgery. Patient Educ  
36  
37 358 Couns 2002;**47**:265-72
- 38  
39 359 8. Haripriya A, Tan CS, Venkatesh R, et al. Effect of preoperative counseling on fear from  
40  
41 360 visual sensations during phacoemulsification under topical anesthesia. J Cataract  
42  
43 361 Refract Surg 2011;**37**:814-8
- 44  
45 362 9. Vielpeau I, Billotte C, Kreidie J, et al. [Comparative study between topical anesthesia  
46  
47 363 and sub-Tenon's capsule anesthesia for cataract surgery]. J Fr Ophtalmol  
48  
49 364 1999;**22**:48-51
- 50  
51  
52  
53  
54  
55  
56  
57  
58  
59  
60

## Subjective assessment of the duration of cataract surgery

- 1  
2  
3 365 10. Roman S, Auclin F, Ullern M. Topical versus peribulbar anesthesia in cataract  
4  
5 366 surgery. *J Cataract Refract Surg* 1996;**22**:1121-4  
6  
7 367 11. Bland JM, Altman DG. Statistical methods for assessing agreement between two  
8  
9 368 methods of clinical measurement. *Lancet* 1986;**1**:307-10  
10  
11 369 12. Hosler MR, Scott IU, Kunselman AR, et al. Impact of resident participation in cataract  
12  
13 370 surgery on operative time and cost. *Ophthalmology* 2012;**119**:95-8  
14  
15 371 13. Wiggins MN, Warner DB. Resident physician operative times during cataract surgery.  
16  
17 372 *Ophthalmic Surg Lasers Imaging* 2010;**41**:518-22  
18  
19 373 14. Tranos PG, Wickremasinghe SS, Sinclair N, et al. Visual perception during  
20  
21 374 phacoemulsification cataract surgery under topical and regional anaesthesia.  
22  
23 375 *Acta Ophthalmol Scand* 2003;**81**:118-22  
24  
25 376 15. Wickremasinghe SS, Tranos PG, Sinclair N, et al. Visual perception during  
26  
27 377 phacoemulsification cataract surgery under subtenons anaesthesia. *Eye (Lond)*  
28  
29 378 2003;**17**:501-5  
30  
31 379 16. Ursea R, Feng MT, Zhou M, et al. Pain perception in sequential cataract surgery:  
32  
33 380 comparison of first and second procedures. *J Cataract Refract Surg*  
34  
35 381 2011;**37**:1009-14  
36  
37 382 17. Ang CL, Au Eong KG, Lee SS, et al. Patients' expectation and experience of visual  
38  
39 383 sensations during phacoemulsification under topical anaesthesia. *Eye (Lond)*  
40  
41 384 2007;**21**:1162-7  
42  
43 385 18. Bardocci A, Ciucci F, Lofoco G, et al. Pain during second eye cataract surgery under  
44  
45 386 topical anesthesia: an intraindividual study. *Graefes Arch Clin Exp Ophthalmol*  
46  
47 387 2011;**249**:1511-4  
48  
49  
50  
51  
52  
53  
54  
55  
56  
57  
58  
59  
60

## Subjective assessment of the duration of cataract surgery

- 1  
2  
3 388 19. Chylack LT, Jr., Wolfe JK, Singer DM, et al. The Lens Opacities Classification System  
4  
5 389 III. The Longitudinal Study of Cataract Study Group. Arch Ophthalmol  
6  
7 390 1993;**111**:831-6  
8  
9  
10 391 20. Age-Related Eye Disease Study Research G. The age-related eye disease study  
11  
12 392 (AREDS) system for classifying cataracts from photographs: AREDS report no. 4.  
13  
14 393 Am J Ophthalmol 2001;**131**:167-75  
15  
16 394 21. Nangia V, Jonas JB, Sinha A, et al. Visual acuity and associated factors. The Central  
17  
18 395 India Eye and Medical Study. PLoS One 2011;**6**:e22756  
19  
20  
21 396 22. Nixon DR. Preoperative cataract grading by Scheimpflug imaging and effect on  
22  
23 397 operative fluidics and phacoemulsification energy. J Cataract Refract Surg  
24  
25 398 2010;**36**:242-6  
26  
27  
28 399 23. Wong T, Hingorani M, Lee V. Phacoemulsification time and power requirements in  
29  
30 400 phaco chop and divide and conquer nucleofractis techniques. J Cataract Refract  
31  
32 401 Surg 2000;**26**:1374-8  
33  
34  
35 402 24. Sanmugasunderam S, Khalfan A. Is fasting required before cataract surgery? A  
36  
37 403 retrospective review. Can J Ophthalmol 2009;**44**:655-6  
38  
39 404 25. Modi N, Shaw S, Allman K, et al. Local anaesthetic cataract surgery: factors  
40  
41 405 influencing perception of pain, anxiety and overall satisfaction. J Perioper Pract  
42  
43 406 2008;**18**:28-33  
44  
45  
46 407  
47 408  
48  
49  
50  
51  
52  
53  
54  
55  
56  
57  
58  
59  
60

Subjective assessment of the duration of cataract surgery

1  
2  
3 409 **TABLE AND FIGURE LEGENDS**

4  
5 410

6  
7 411 **Table 1.** Patient population, preoperative schedule and surgical procedures.

8  
9 412 IQR, Interquartile range

10 413 **Table 2** Univariate and multivariate analysis of factors associated with surgery

11 414 duration.

12 415 r, Pearson's correlation coefficient; SS, sum of squares; MS, mean squares; VA, visual

13 416 acuity; NA, not applicable (factors with univariate p-values > 0.10 were not included in

14 417 the multivariate analysis ( p-values are provided in the text)

15 418

16  
17  
18  
19  
20  
21  
22  
23  
24  
25  
26 419

---

27  
28 420 **Figure 1.** Bland-Altman plot between objective and patient-assessed surgery duration.

29 421 The solid line indicates the mean difference (or bias); the dash line indicates the limits of

30 422 agreement.

31 423 **Figure 2.** Objective surgery duration according to the surgeon's experience. The bar in

32 424 the box indicates the median, the cross the mean and the lower and upper hinge the

33 425 interquartile range. The whisker extends to the most extreme data point which is no

34 426 more than 1.5 times the interquartile range. Dots represent values outside the fences

35 427 (outliers). \*Kruskal-Wallis test

36 428 **Figure 3.** Objective surgery duration according to the pain-score group. The bar in the

37 429 box indicates the median, the cross the mean and the lower and upper hinge the

38 430 interquartile range. The whisker extends to the most extreme data point which is no

39 431 more than 1.5 times the interquartile range. Dots represent values outside the fences

40 432 (outliers). \*Kruskal-Wallis test

41 433

## Subjective assessment of the duration of cataract surgery

**Table 1** Patient population, preoperative schedule and surgical procedures

| Variable                                                                 | Value             |
|--------------------------------------------------------------------------|-------------------|
| Patients (n)                                                             | 277               |
| Cataract surgery cases (n)                                               | 359               |
| Mean Age (years ( $\pm$ SD))                                             | 73.4 ( $\pm$ 9.2) |
| Gender (cases, n (%))                                                    |                   |
| Male                                                                     | 152 (42.3%)       |
| Female                                                                   | 207 (57.7%)       |
| Preoperative vision                                                      |                   |
| Mean LogMar preoperative visual acuity ( $\pm$ SD)                       | 0.45 ( $\pm$ 0.2) |
| Schedule on the day of surgery (hours)                                   |                   |
| Mean duration of fasting ( $\pm$ SD)                                     | 14.1 ( $\pm$ 1.8) |
| Mean duration between awakening and surgery ( $\pm$ SD)                  | 4.7 ( $\pm$ 1.2)  |
| Mean waiting time in the department ( $\pm$ SD)                          | 2.4 ( $\pm$ 0.7)  |
| Unilateral or Bilateral procedures during study period (patients, n (%)) |                   |
| Unilateral                                                               | 195 (70%)         |
| Bilateral                                                                | 82 (30%)          |
| Sequence of surgery (cases, n (%))                                       |                   |
| First eye                                                                | 203 (57%)         |
| Second eye                                                               | 156 (43%)         |
| Surgeons' experience (cases, n (%))                                      |                   |
| Senior                                                                   | 259 (72%)         |
| Junior                                                                   | 32 (9%)           |
| Partial or full surgery by residents                                     | 68 (19%)          |
| Phacoemulsifier (cases, n (%))                                           |                   |
| Alcon Infiniti®                                                          | 238 (66%)         |
| Abbott Medical Optics Signature®                                         | 64 (18%)          |
| Bausch & Lomb Stellaris®                                                 | 57 (16%)          |
| Duration of the procedure (minutes (IQR))                                |                   |
| Objective duration                                                       | 13.6 (11.1-17.5)  |
| Patient-assessed duration                                                | 15 (11-20)        |

IQR, Interquartile range

434

435

## Subjective assessment of the duration of cataract surgery

**Table 2** Univariate and multivariate analysis of factors associated with surgery duration.

| Factor                                    | Objective surgery duration |              |       |         | Patient-assessed surgery duration |              |       |        |
|-------------------------------------------|----------------------------|--------------|-------|---------|-----------------------------------|--------------|-------|--------|
|                                           | Univariate                 | Multivariate |       |         | Univariate                        | Multivariate |       |        |
|                                           | r                          | SS           | MS    | pValue  | r                                 | SS           | MS    | pValue |
| Age                                       | NA                         | NA           | NA    | NA      | 0.136                             | 253.9        | 253.9 | 0.02   |
| Mean preoperative VA                      | 0.185                      | 217.1        | 217.1 | 0.003   | NA                                | NA           | NA    | NA     |
| Fasting time                              | 0.13                       | 17.1         | 17.1  | 0.398   | NA                                | NA           | NA    | NA     |
| Time interval between wake-up and surgery | 0.184                      | 0.03         | 0.03  | 0.972   | 0.132                             | 16.3         | 16.3  | 0.555  |
| Waiting time in the department            | 0.239                      | 159.9        | 159.9 | 0.010   | 0.115                             | 18.2         | 18.2  | 0.533  |
| Surgeon                                   | NA                         | 1600.5       | 800.2 | <0.0001 | NA                                | 600.1        | 300.0 | 0.002  |
| Pain self-assessment                      | NA                         | 612.6        | 153.1 | <0.0001 | NA                                | 1036.5       | 259.1 | 0.0002 |

r, Pearson's correlation coefficient; SS, sum of squares; MS, mean squares; VA, visual acuity; NA, not applicable (factors with univariate p-values > 0.10 were not included in the multivariate analysis ( p-values are provided in the text)

436

437



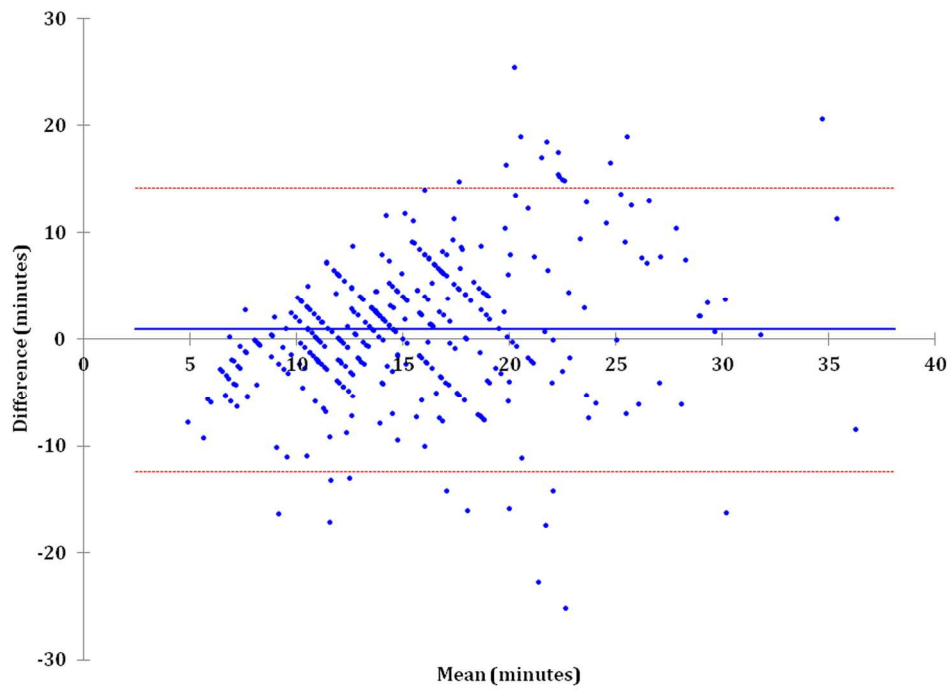

Figure 1. Bland-Altman plot between objective and patient-assessed surgery duration. The solid line indicates the mean difference (or bias); the dash line indicates the limits of agreement.

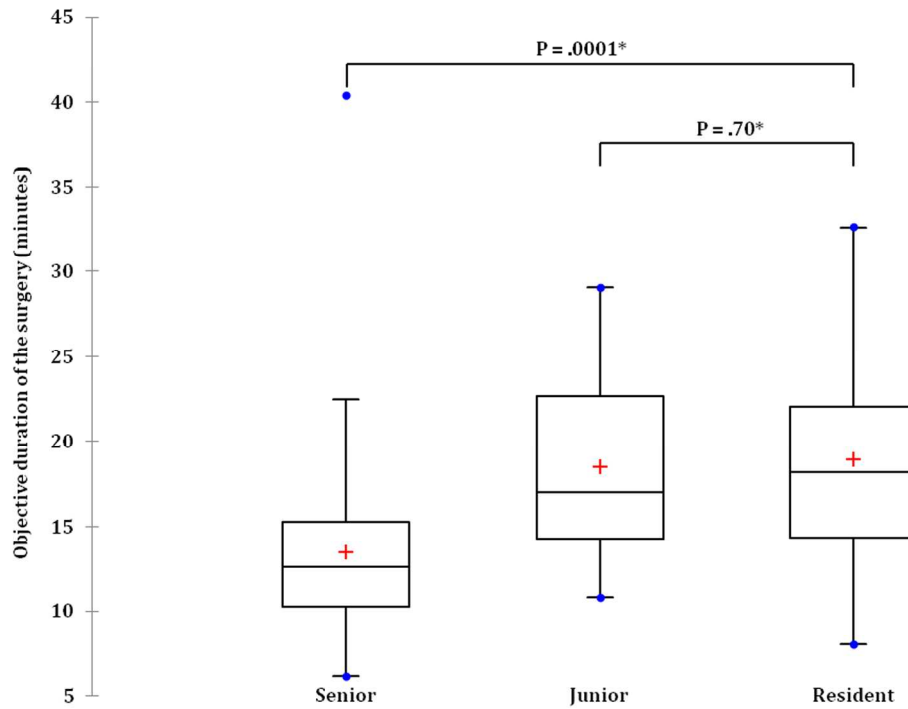

Figure 2. Objective surgery duration according to the surgeon's experience. The bar in the box indicates the median, the cross the mean and the lower and upper hinge the interquartile range. The whisker extends to the most extreme data point which is no more than 1.5 times the interquartile range. Dots represent values outside the fences (outliers). \*Kruskal-Wallis test

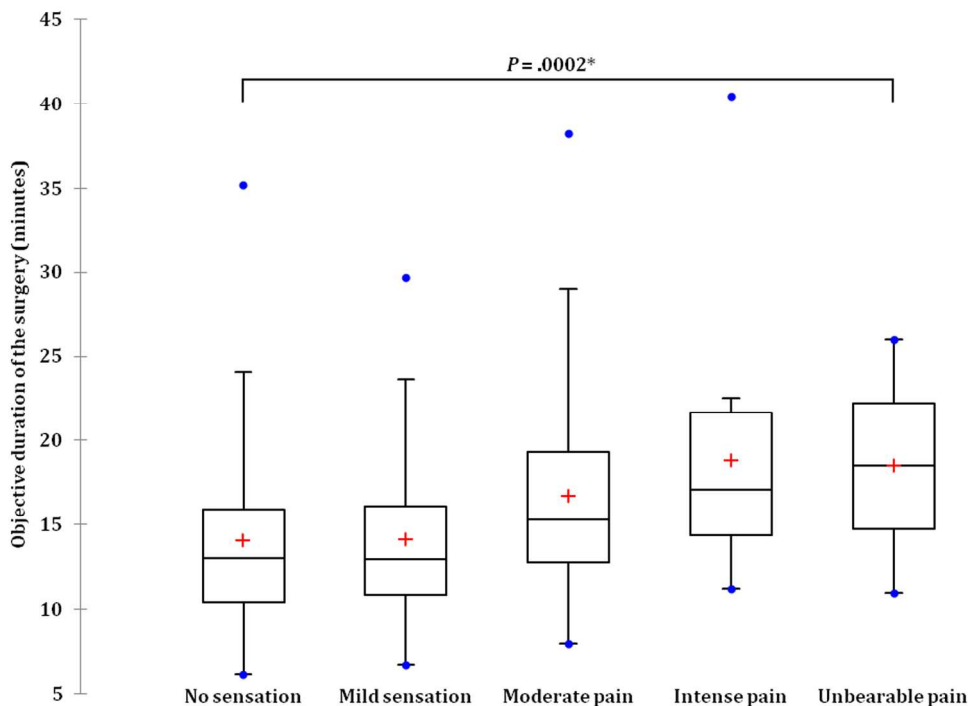

Figure 3. Objective surgery duration according to the pain-score group. The bar in the box indicates the median, the cross the mean and the lower and upper hinge the interquartile range. The whisker extends to the most extreme data point which is no more than 1.5 times the interquartile range. Dots represent values outside the fences (outliers). \*Kruskal-Wallis test

ew only

1  
2  
3 Ref.: Ms. No. JCRS-12-698  
4

5 Patients' subjective assessment of the duration of cataract surgery  
6  
7 Journal of Cataract & Refractive Surgery  
8  
9

10 Dear Professor Brézin,  
11

12  
13 The reviewers and the editor have completed their assessments of your manuscript  
14 Patients' subjective assessment of the duration of cataract surgery (JCRS-12-698) and  
15 the paper has unfortunately not been recommended for publication. I have enclosed  
16 the referees' comments below for your review. The journal now receives a large  
17 number of excellent manuscripts and regrettably is unable to publish all of them.  
18  
19

20  
21 We appreciate your submitting the manuscript to JCRS and are sorry we do not have  
22 a more favorable decision. I hope you will consider submitting future manuscripts to  
23 us.  
24  
25

26 Sincerely,  
27  
28

29 Emanuel Rosen, MD, FRCSE  
30  
31

32 Editor Journal of Cataract & Refractive Surgery  
33  
34  
35  
36  
37  
38  
39

40  
41  
42 Reviewers' comments:  
43

44 *Reviewer #1:*  
45

- 46  
47 1. *Although an interesting study to consider the patients' comfort level through actual*  
48 *versus perceived duration of surgery, it does not add scientific value for the surgeon.*  
49

50  
51 We agree that the results of our study do not revolutionize the science of cataract  
52 surgery. However, we believe that a better understanding of the patients'  
53 perceptions during the surgery is a laudable goal that adds to the knowledge in the  
54 field of cataract surgery.  
55  
56  
57  
58  
59  
60

1  
2  
3 Indeed, the surgery duration has been recognized as one of the important factors  
4 contributing to patients' fear in the preoperative setting (Ref 7 Nijkamp MD, Ruiters  
5 RA, Roeling M, et al. Factors related to fear in patients undergoing cataract surgery: a  
6 qualitative study focusing on factors associated with fear and reassurance among patients  
7 who need to undergo cataract surgery. Patient Educ Couns 2002;47(3):265). It has also  
8 been shown that patients' information can in turn reduce anxiety and improve their  
9 satisfaction. (Ref 8 Haripriya A, Tan CS, Venkatesh R, et al. Effect of preoperative  
10 counseling on fear from visual sensations during phacoemulsification under topical  
11 anesthesia. J Cataract Refract Surg 2011;37(5):814-8)  
12  
13  
14  
15  
16  
17  
18  
19  
20

21 Our literature review found only few data regarding the duration of cataract surgery  
22 and did not detect any existing articles assessing its perception by patients. The  
23 introduction section has been modified to better reflect the above.  
24  
25  
26  
27

- 28 2. *I believe the material is better suited as correspondence or case report instead of a full*  
29 *article.*  
30  
31

32 This brings no comment as a series based on the prospective analysis of 359 cases  
33 cannot be submitted as a case-report !  
34  
35  
36  
37  
38  
39  
40  
41  
42  
43  
44  
45  
46  
47  
48  
49  
50  
51  
52  
53  
54  
55  
56  
57  
58  
59  
60

1  
2  
3  
4  
5  
6 Reviewer #2:  
7

8 *This paper evaluates objective surgical time and its subjective perception as well as the*  
9 *dependency on various factors. Objective surgical time and its subjective perception were*  
10 *found to correlate well. Multivariate analysis revealed patient preoperative visual acuity,*  
11 *waiting time in the department, surgeon experience and pain-score group to be independent*  
12 *factors associated with objective surgery duration, and patient age, surgeon experience and*  
13 *pain-score group to be independent factors associated with patient-assessed surgery duration.*  
14  
15  
16  
17  
18  
19

- 20  
21 1. *Overall complication rate was unusually high. Most of these complications will have*  
22 *occurred with the less experienced surgeons. Please give details.*  
23

24  
25 Our complication rate of 2.22% did not statistically differ from the 1.92%  
26 complication rate reported by the Cataract National Dataset electronic multicentre  
27 audit of 55,567 operations ( Narendran N, Jaycock P, Johnston RL, et al. *The Cataract*  
28 *National Dataset electronic multicentre audit of 55,567 operations: risk stratification for*  
29 *posterior capsule rupture and vitreous loss. Eye (Lond) 2009;23(1):31-7)*  
30  
31  
32

33  
34 In our study, 4 out of 8 posterior capsular ruptures occurred in the context of  
35 cataracts with risk factors : 2 traumatic cataracts and 2 pseudoexfoliation syndromes.  
36  
37 One complication occurred in the context of a surgery performed by a resident.  
38  
39  
40

- 41  
42 2. *25% of patients experienced moderate pain. This again is judged an unusual high*  
43 *percentage. Was that also most common with the less experienced surgeons? Again,*  
44 *please give details.*  
45  
46  
47  
48

49 Our percentage of patients reporting moderate pain was consistent with the results  
50 published in reports using the same 5-step scale pain-score as used in our study (Ref  
51 9 Vielpeau I, Billotte C, Kreidie J, et al. [*Comparative study between topical anesthesia and*  
52 *sub-Tenon's capsule anesthesia for cataract surgery]. J Fr Ophtalmol 1999;22(1):48-51,).*  
53  
54  
55 This reference is included in a recent Cochrane meta-analysis by Davison et al. (Ref 4  
56  
57  
58  
59  
60

1  
2  
3 Davison M, Padroni S, Bunce C, et al. Sub-Tenon's anaesthesia versus topical anaesthesia for  
4 cataract surgery. *Cochrane Database Syst Rev* 2007(3):CD006291)  
5  
6  
7  
8  
9

- 10  
11 3. Page 10: duration of fasting ( $P = .014$ ), time interval between wakeup and surgery ( $P$   
12  $= .0004$ ), and waiting time in the department ( $P < .0001$ ) were found to influence  
13 objective surgery duration: how is this unexpected finding explained? Please discuss.  
14  
15  
16

17 We unexpectedly observed that the duration of fasting and the time interval between  
18 wakeup and surgery, as well as waiting time in the department, were associated with  
19 longer procedures. This might have been linked to surgeons slowing down after a  
20 number of cases and/or a trend to schedule teaching cases at the end rather than at the  
21 beginning of surgical sessions.  
22  
23  
24  
25

- 26  
27 4. Regarding sedation, it would have been interesting to find out if sedation influences  
28 the time perception of the patient by performing cataract surgery in one eye with and  
29 the partner eye without the use of sedation.  
30  
31  
32

33 This objective was not within the goal of our study and would have required a  
34 randomized controlled trial.  
35  
36  
37  
38  
39

---

STROBE 2007 (v4) Statement—Checklist of items that should be included in reports of cohort studies

| Section/Topic             | Item # | Recommendation                                                                                                                                                                       | Reported on page # |
|---------------------------|--------|--------------------------------------------------------------------------------------------------------------------------------------------------------------------------------------|--------------------|
| Title and abstract        | 1      | (a) Indicate the study’s design with a commonly used term in the title or the abstract                                                                                               | 1 and 3            |
|                           |        | (b) Provide in the abstract an informative and balanced summary of what was done and what was found                                                                                  | 3                  |
| <b>Introduction</b>       |        |                                                                                                                                                                                      |                    |
| Background/rationale      | 2      | Explain the scientific background and rationale for the investigation being reported                                                                                                 | 5                  |
| Objectives                | 3      | State specific objectives, including any prespecified hypotheses                                                                                                                     | 6                  |
| <b>Methods</b>            |        |                                                                                                                                                                                      |                    |
| Study design              | 4      | Present key elements of study design early in the paper                                                                                                                              | 7                  |
| Setting                   | 5      | Describe the setting, locations, and relevant dates, including periods of recruitment, exposure, follow-up, and data collection                                                      | 7                  |
| Participants              | 6      | (a) Give the eligibility criteria, and the sources and methods of selection of participants. Describe methods of follow-up                                                           | 7                  |
|                           |        | (b) For matched studies, give matching criteria and number of exposed and unexposed                                                                                                  | Not applicable     |
| Variables                 | 7      | Clearly define all outcomes, exposures, predictors, potential confounders, and effect modifiers. Give diagnostic criteria, if applicable                                             | 7, 8               |
| Data sources/ measurement | 8*     | For each variable of interest, give sources of data and details of methods of assessment (measurement). Describe comparability of assessment methods if there is more than one group | 7                  |
| Bias                      | 9      | Describe any efforts to address potential sources of bias                                                                                                                            | 7                  |
| Study size                | 10     | Explain how the study size was arrived at                                                                                                                                            | 7                  |
| Quantitative variables    | 11     | Explain how quantitative variables were handled in the analyses. If applicable, describe which groupings were chosen and why                                                         | 8                  |
| Statistical methods       | 12     | (a) Describe all statistical methods, including those used to control for confounding                                                                                                | 8                  |
|                           |        | (b) Describe any methods used to examine subgroups and interactions                                                                                                                  | 8                  |
|                           |        | (c) Explain how missing data were addressed                                                                                                                                          | 8                  |
|                           |        | (d) If applicable, explain how loss to follow-up was addressed                                                                                                                       | NA                 |
|                           |        | (e) Describe any sensitivity analyses                                                                                                                                                | NA                 |
| <b>Results</b>            |        |                                                                                                                                                                                      |                    |



|                          |     |                                                                                                                                                                                                              |          |
|--------------------------|-----|--------------------------------------------------------------------------------------------------------------------------------------------------------------------------------------------------------------|----------|
| Participants             | 13* | (a) Report numbers of individuals at each stage of study—eg numbers potentially eligible, examined for eligibility, confirmed eligible, included in the study, completing follow-up, and analysed            | 10       |
|                          |     | (b) Give reasons for non-participation at each stage                                                                                                                                                         | NA       |
|                          |     | (c) Consider use of a flow diagram                                                                                                                                                                           | NA       |
| Descriptive data         | 14* | (a) Give characteristics of study participants (eg demographic, clinical, social) and information on exposures and potential confounders                                                                     | Table 1  |
|                          |     | (b) Indicate number of participants with missing data for each variable of interest                                                                                                                          | NA       |
|                          |     | (c) Summarise follow-up time (eg, average and total amount)                                                                                                                                                  | NA       |
| Outcome data             | 15* | Report numbers of outcome events or summary measures over time                                                                                                                                               | NA       |
| Main results             | 16  | (a) Give unadjusted estimates and, if applicable, confounder-adjusted estimates and their precision (eg, 95% confidence interval). Make clear which confounders were adjusted for and why they were included | NA       |
|                          |     | (b) Report category boundaries when continuous variables were categorized                                                                                                                                    | NA       |
|                          |     | (c) If relevant, consider translating estimates of relative risk into absolute risk for a meaningful time period                                                                                             | NA       |
| Other analyses           | 17  | Report other analyses done—eg analyses of subgroups and interactions, and sensitivity analyses                                                                                                               | NA       |
| <b>Discussion</b>        |     |                                                                                                                                                                                                              |          |
| Key results              | 18  | Summarise key results with reference to study objectives                                                                                                                                                     | 13       |
| <b>Limitations</b>       |     |                                                                                                                                                                                                              |          |
| Interpretation           | 20  | Give a cautious overall interpretation of results considering objectives, limitations, multiplicity of analyses, results from similar studies, and other relevant evidence                                   | 13.14.15 |
| Generalisability         | 21  | Discuss the generalisability (external validity) of the study results                                                                                                                                        | 15       |
| <b>Other information</b> |     |                                                                                                                                                                                                              |          |
| Funding                  | 22  | Give the source of funding and the role of the funders for the present study and, if applicable, for the original study on which the present article is based                                                | 16       |

\*Give information separately for cases and controls in case-control studies and, if applicable, for exposed and unexposed groups in cohort and cross-sectional studies.

**Note:** An Explanation and Elaboration article discusses each checklist item and gives methodological background and published examples of transparent reporting. The STROBE checklist is best used in conjunction with this article (freely available on the Web sites of PLoS Medicine at <http://www.plosmedicine.org/>, Annals of Internal Medicine at <http://www.annals.org/>, and Epidemiology at <http://www.epidem.com/>). Information on the STROBE Initiative is available at [www.strobe-statement.org](http://www.strobe-statement.org).



**Patients' subjective assessment of the duration of cataract surgery: A case series**

|                                 |                                                                                                                                                                                                                                                                                                                                                                                                                                                                                                                                                              |
|---------------------------------|--------------------------------------------------------------------------------------------------------------------------------------------------------------------------------------------------------------------------------------------------------------------------------------------------------------------------------------------------------------------------------------------------------------------------------------------------------------------------------------------------------------------------------------------------------------|
| Journal:                        | <i>BMJ Open</i>                                                                                                                                                                                                                                                                                                                                                                                                                                                                                                                                              |
| Manuscript ID:                  | bmjopen-2012-002497.R1                                                                                                                                                                                                                                                                                                                                                                                                                                                                                                                                       |
| Article Type:                   | Research                                                                                                                                                                                                                                                                                                                                                                                                                                                                                                                                                     |
| Date Submitted by the Author:   | 12-Mar-2013                                                                                                                                                                                                                                                                                                                                                                                                                                                                                                                                                  |
| Complete List of Authors:       | Rothschild, Pierre-Raphaël; Hôpital Cochin, Université Paris Descartes, France, Ophtalmologie<br>Grabar, Sophie; Université Paris Descartes, Hôpital Cochin, Service de Biostatistique et Epidémiologie<br>Le Du, Brivael; Hôpital Cochin, Université Paris Descartes, France, Ophtalmologie<br>Temstet, Cyril; Hôpital Cochin, Université Paris Descartes, France, Ophtalmologie<br>Rostaqui, Olga; Hôpital Cochin, Université Paris Descartes, France, Ophtalmologie<br>Brezin, Antoine; Hôpital Cochin, Université Paris Descartes, France, Ophtalmologie |
| <b>Primary Subject Heading</b>: | Ophthalmology                                                                                                                                                                                                                                                                                                                                                                                                                                                                                                                                                |
| Secondary Subject Heading:      | Surgery, Patient-centred medicine, Medical education and training                                                                                                                                                                                                                                                                                                                                                                                                                                                                                            |
| Keywords:                       | Cataract and refractive surgery < OPHTHALMOLOGY, Medical Education, Treatment Surgery                                                                                                                                                                                                                                                                                                                                                                                                                                                                        |
|                                 |                                                                                                                                                                                                                                                                                                                                                                                                                                                                                                                                                              |

SCHOLARONE™  
Manuscripts

Subjective assessment of the duration of cataract surgery

1  
2  
3 **1 Patients' subjective assessment of the duration of cataract surgery:**

4  
5  
6 **2 A case series**

7  
8  
9  
10  
11 Pierre-Raphael Rothschild<sup>1</sup> MD, Sophie Grabar<sup>2</sup> MD, PhD, Brivael Le Dû<sup>1</sup> MD\*, Cyril  
12  
13 Temstet<sup>1</sup> MD\*, Olga Rostaqui<sup>1</sup> MD, Antoine P. Brézin<sup>1</sup> MD, PhD.

14  
15 \* These 2 authors have equally contributed to this work

16  
17  
18 <sup>1</sup> Université Paris Descartes, Hôpital Cochin, Service d'Ophtalmologie, Assistance  
19  
20 Publique Hôpitaux de Paris, 27 rue du faubourg Saint-Jacques, 75014 Paris, France.

21  
22 <sup>2</sup> Université Paris Descartes, Hôpital Cochin, Service de Biostatistique et Epidémiologie,  
23  
24 Assistance Publique Hôpitaux de Paris, 27 rue du faubourg Saint-Jacques, 75014 Paris,  
25  
26  
27 France.

28  
29  
30  
31 **13 Dryad provisional DOI to the submission : doi:10.5061/dryad.27sk4**

32  
33  
34  
35  
36  
37  
38  
39  
40  
41  
42  
43  
44  
45  
46  
47  
48  
49  
50  
51  
52  
53  
54  
55  
56  
57  
58  
59  
60  
14  
15  
16  
17  
18  
19  
20  
21  
22  
23  
24  
25  
Keywords: cataract; surgical procedure; time perception; self-assessment

Presented in part at the ARVO meeting, Fort Lauderdale, Florida, USA, May 2012

Word count: Abstract 298 words; text 2397 words, 25 references, 5 figures and tables

Corresponding author and address reprint requests to Antoine P. Brézin, MD, PhD.

Université Paris Descartes, Service d'ophtalmologie, Hôpital Cochin, 27 rue du Faubourg  
Saint-Jacques, 75014 PARIS France, or at antoine.brezin@cch.aphp.fr

Phone: 33 - 1 58412200

Fax: 33 - 1 58412210

Subjective assessment of the duration of cataract surgery

1  
2  
3 26 **Article summary**

4  
5 27 **Article focus:**

- 6  
7 28 1. Modern cataract surgery is a safe and quick procedure. Nonetheless it remains a  
8  
9  
10 29 stressful event from the patients' standpoint.  
11  
12 30 2. Several factors have been recognized to participate in patients' preoperative  
13  
14 31 anxiety and targeted preoperative counselling has been shown to be of value.  
15  
16 32 3. Though cataract surgery duration is a frequent patient preoperative qualm it has  
17  
18 33 not been properly studied and patient's perception of time is largely unknown.

19  
20  
21 34 **Key messages:**

- 22  
23 35 1. Patients' perceived cataract surgery duration is fair whatever the circumstances.  
24  
25 36 2. Surgeons' experience and pain perception were the two factors independently  
26  
27 37 associated with surgery duration.

28  
29  
30 38 **Strengths and limitations:**

- 31  
32 39 1. The large studied population and the strict definition used for operative time  
33  
34 40 provide reliable measurements of the surgery duration whether objective or  
35  
36 41 patient perceived.  
37  
38 42 2. Anxiety status, chronic illnesses, systemic medications were not part of our  
39  
40 43 standardized study protocol. Moreover all our patients were on sedative  
41  
42 44 medications at the time of surgery. This might have affected patients' perceptions  
43  
44 45 3. The benefit in terms of patient comfort/satisfaction of preoperative information  
45  
46 46 regarding surgery duration needs specific studied beyond the scope of the  
47  
48 47 present study.

49  
50  
51  
52  
53 48

Subjective assessment of the duration of cataract surgery

1  
2  
3 49 **Objectives:** Surgery duration is a source of preoperative anxiety for patients undergoing  
4  
5 50 cataract surgery. To better inform patients we evaluated the agreement between  
6  
7 51 objective and patient perceived surgery duration.  
8

9  
10 52 **Design:** case series.

11  
12 53 **Setting:** Public teaching university hospital (Paris, France).

13  
14 54 **Participants:** During the study period, 368 cataract surgery cases performed on 285  
15  
16 55 patients were included, 85 cases were excluded from the final analysis. All patients who  
17  
18 56 had uneventful phacoemulsification were included. Cases with any significant  
19  
20 57 intraoperative adverse event or cases requiring additional anaesthesia other than  
21  
22 58 topical were excluded. Resident performed cases were also excluded.  
23  
24

25  
26 59 **Primary and secondary outcomes:** Procedures were timed (objective duration) and  
27  
28 60 patients were asked, immediately afterwards, to assess the duration of their surgery  
29  
30 61 (patient-assessed duration). The agreement between objective and patient-assessed  
31  
32 62 duration as well as influencing factors was studied.  
33

34  
35 63 **Results:** Mean objective duration ( $13.9 \pm 5$  minutes) and patient-assessed duration  
36  
37 64 ( $15.3 \pm 6.9$  minutes) were significantly correlated (Spearman's  $r = 0.452$ ,  $P < .0001$ ).  
38  
39 65 Furthermore, Bland-Altman analysis and the intraclass correlation coefficient (0.341,  
40  
41 66 95% CI, 0.23-0.44) showed a fair agreement. On univariate analysis senior-performed  
42  
43 67 procedures were significantly shorter than those performed by juniors (13.4 versus 17.8  
44  
45 68 minutes,  $P = .0001$ ). Pain was recorded as "no sensation" (31.5 % of the cases), "mild  
46  
47 69 sensation" (41 %), "moderate pain" (23.3 %), "intense pain" (3.5 %) and "unbearable  
48  
49 70 pain" (0.7 %). Groups with high pain-score had significantly longer procedures ( $P$   
50  
51 71  $< .001$ ). Multivariate analysis revealed that the only independent factors associated with  
52  
53 72 both the objective and patient-assessed duration of surgery was surgeon's experience  
54  
55 73 and pain-score.  
56  
57  
58  
59  
60

Subjective assessment of the duration of cataract surgery

1  
2  
3 74 **Conclusions:** Patients fairly estimated the duration of their surgery in our study,  
4  
5 75 suggesting that emotions associated with eye surgery under topical anaesthesia did not  
6  
7 76 hinder patients' perception of time. However, the benefit of preoperative counselling  
8  
9  
10 77 regarding the duration of surgery will need further evaluation  
11  
12  
13  
14  
15  
16  
17  
18  
19  
20  
21  
22  
23  
24  
25  
26  
27  
28  
29  
30  
31  
32  
33  
34  
35  
36  
37  
38  
39  
40  
41  
42  
43  
44  
45  
46  
47  
48  
49  
50  
51  
52  
53  
54  
55  
56  
57  
58  
59  
60

For peer review only

Subjective assessment of the duration of cataract surgery

1  
2  
3  
4  
5  
6  
7  
8  
9  
10  
11  
12  
13  
14  
15  
16  
17  
18  
19  
20  
21  
22  
23  
24  
25  
26  
27  
28  
29  
30  
31  
32  
33  
34  
35  
36  
37  
38  
39  
40  
41  
42  
43  
44  
45  
46  
47  
48  
49  
50  
51  
52  
53  
54  
55  
56  
57  
58  
59  
60

78 **INTRODUCTION**

79

80 The shortened duration of cataract surgery is one of the striking features owing to the  
81 improvement of surgical techniques. Live surgery events and real-time surgical video  
82 recordings by elite surgeons nowadays seldom show procedures lasting more than 10  
83 minutes. The quickness of modern cataract surgery by phacoemulsification has made  
84 topical anaesthesia, whose effects wear off faster than previously used peribulbar  
85 injections, the method of choice for analgesia.[1] Nevertheless, whatever the amount of  
86 trust patients put in their surgeon, many remain apprehensive of eye surgery under full  
87 consciousness or with minimal sedation by systemic administration of drugs. This  
88 apprehension is often focused on the fear of involuntary eye movements during the  
89 procedure, which may complicate the surgeon's task, on patients' fear of seeing their eye  
90 surgery or on the fear of painful sensations. In reply, quite abundant data are now  
91 available stemming from several studies focused on the impressions of patients during  
92 the procedures.[2 3] Various methods to assess the perception of pain have been used  
93 and have validated that cataract surgery under topical anaesthesia is by and large  
94 usually a painless procedure.[4] Visual sensations experienced by patients under the  
95 operating microscope have also been recorded and have mostly been found to be of no  
96 concern.[5 6] In addition to these topics, patients prior to their surgery have frequent  
97 qualms regarding the duration of the procedure and hence regarding their ability to  
98 withstand their eye surgery under topical anaesthesia.[7] Providing additional targeted  
99 information to patients undergoing cataract surgery has been shown to improve their  
100 satisfaction.[8]

101 This information could include data regarding the duration of the procedure. However,  
102 surprisingly, in contrast to the common nature of cataract surgery by modern

Subjective assessment of the duration of cataract surgery

1  
2  
3 103 phacoemulsification, there is scarce data regarding its duration. The purpose of this  
4  
5 104 study was therefore to compare the objective duration of cataract surgery with the  
6  
7 105 patients' subjective assessment of this duration.  
8

9  
10 106  
11  
12  
13  
14  
15  
16  
17  
18  
19  
20  
21  
22  
23  
24  
25  
26  
27  
28  
29  
30  
31  
32  
33  
34  
35  
36  
37  
38  
39  
40  
41  
42  
43  
44  
45  
46  
47  
48  
49  
50  
51  
52  
53  
54  
55  
56  
57  
58  
59  
60

For peer review only



Subjective assessment of the duration of cataract surgery

1  
2  
3 107 **METHODS**  
4

5 108  
6 109 The study was set in the department of ophthalmology of Hôpital Cochin, a teaching  
7  
8 110 university hospital located in Paris, France. Data were collected prospectively in  
9  
10 111 consecutive patients operated between May 17, 2011 and July 22, 2011.  
12

13 112 All patients who had uneventful phacoemulsification under topical anaesthesia  
14  
15 113 with placement of an intraocular lens in the capsular bag were included. Cases with any  
16  
17 114 “significant adverse event” defined either by a major intraoperative complication such  
18  
19 115 as vitreous loss or by a technical problem such as phacoemulsifier malfunction that  
20  
21 116 prolonged the procedure by 10 minutes or more were excluded. Similarly, patients who  
22  
23 117 required any anaesthesia in addition to topical lidocaine 2% gel, or those who required  
24  
25 118 sedation in addition to the preoperatively given hydroxyzine were excluded from the  
26  
27 119 analyses. Teaching cases involving resident participation were also excluded from the  
28  
29 120 analyses. The duration of the procedure, referred throughout the text as the objective  
30  
31 121 duration, was timed by operating room nurses as the exposure of the patients’ eye to the  
32  
33 122 light of the operating microscope, from the beginning until the end of the surgery.  
34  
35  
36  
37

38 123 The objective duration of surgery was compared to its subjective assessment  
39  
40 124 obtained by questioning patients immediately after drape removal and referred  
41  
42 125 throughout the text as the patient-assessed duration. If the initial patients’ replies were  
43  
44 126 imprecise, a second line of questioning was used requesting patients to assess the  
45  
46 127 duration of their surgery by the minute. To avoid assessment biases, patients were not  
47  
48 128 warned before the surgery that they would be asked to assess the duration of their  
49  
50 129 procedure.  
51  
52  
53  
54  
55  
56  
57  
58  
59  
60

Subjective assessment of the duration of cataract surgery

1  
2  
3 130 The patients' perception of pain during surgery was also assessed with a  
4  
5 131 standard numeric scale, graded from 0 to 4: 0 (no pain), 1 (mild sensation), 2 (moderate  
6  
7 132 pain), 3 (intense pain), 4 (unbearable pain) as previously used in other studies.[4 9 10]  
8

9  
10 133 Other factors were also recorded: age, gender, first or second eye surgery, and  
11  
12 134 best corrected preoperative visual acuity. All surgeries were performed between 8:00  
13  
14 135 AM and 2:00 PM and the patients were requested to fast from midnight on the night  
15  
16 136 prior to their surgery. The patients' preoperative schedules were recorded: duration of  
17  
18 137 fasting, time interval between wake-up and surgery, time interval between entry in the  
19  
20 138 department suite and surgery (waiting time in the department). All patients received 0.5  
21  
22 139 mg/kg of hydroxyzine at their time of arrival in our department used as sedative and  
23  
24 140 additive sedation during the surgery when necessary. No other drug was given  
25  
26 141 preoperatively, including non-steroidal anti-inflammatory drugs. The need for  
27  
28 142 additional anaesthetic techniques was recorded.  
29  
30  
31

32 143 Surgeons were categorized as seniors when they had the experience of more than  
33  
34 144 1000 procedures performed prior to the study or as juniors otherwise.  
35  
36

37 145

### 38 146 **Statistical analysis**

39 147 Categorical variables are expressed as numbers (percentages) and comparisons were  
40  
41  
42 148 conducted using the Fisher-exact test. For continuous variables, mean  $\pm$  standard  
43  
44 149 deviation (SD) or median (interquartile range, IQR) are provided, and comparisons were  
45  
46 150 conducted using the Kruskal-Wallis test or the student's t-test.  
47  
48

49 151 To evaluate the agreement between objective and patient-assessed duration, a Bland-  
50  
51 152 Altman plot was used.[11] The differences between the two methods (i.e. objective and  
52  
53 153 patient-assessed duration) are plotted against their mean. The Bland-Altman analysis  
54  
55 154 provides the mean difference (also called bias) as well as the 95% or the 68% limits of  
56  
57  
58  
59  
60

Subjective assessment of the duration of cataract surgery

1  
2  
3 155 agreement corresponding respectively to the mean difference  $\pm 2$  SD or  $\pm 1$  SD. When  
4  
5 156 agreement between the two methods is good, most of the differences should reside  
6  
7 157 within the agreement limit interval. We also computed the Intraclass correlation  
8  
9 158 coefficient to quantitatively evaluate the agreement.  
10  
11 159 Correlation tests were conducted using the Spearman's correlation coefficient ( $r$ ).  
12  
13 160 Factors with  $P$  values  $<.10$  in the univariate analysis were included in a multivariate  
14  
15 161 linear regression and ANCOVA model to determine the independent factors associated  
16  
17 162 with either objective or patient-assessed surgery duration.  $P$  Values  $<0.05$  were  
18  
19 163 considered significant. All analyses were performed with XLSTAT 2012.2.02 software  
20  
21 164 (Addinsoft, Paris, France).  
22  
23  
24  
25  
26  
27  
28  
29  
30  
31  
32  
33  
34  
35  
36  
37  
38  
39  
40  
41  
42  
43  
44  
45  
46  
47  
48  
49  
50  
51  
52  
53  
54  
55  
56  
57  
58  
59  
60

165

Subjective assessment of the duration of cataract surgery

1  
2  
3 166 **RESULTS**

4 167  
5 168 A total of 283 cases performed in 218 patients was analyzed after exclusion of 85 cases  
6  
7 169 (65 patients). Nine cases were excluded for significant intraoperative adverse event  
8  
9  
10 170 including posterior capsular break or zonular disinsertion (8 cases) and phacoemulsifier  
11  
12 171 breakdown (1 case). Four out the 8 cases presenting intraoperative vitreous loss had an  
13  
14 172 identifiable risk factor for this complication, two were traumatic cataracts, and two were  
15  
16 173 cataracts related to severe pseudoexfoliation syndrome. Thirteen other cases required  
17  
18 174 additional anaesthesia or sedation and were therefore excluded. Those included sub-  
19  
20  
21 175 Tenon's block (5 cases), sub-conjunctival injection (1 case), intracameral injection of  
22  
23 176 lidocaine (1 case) and midazolam intravenous sedation (6 cases). Finally 70 cases  
24  
25 177 involving resident participation were excluded. Characteristics of the study population,  
26  
27 178 patients' schedule on the day of surgery, sequence of procedures, phacoemulsifiers used  
28  
29 179 and surgery duration are shown in table 1. No sensation was reported in 106 (31.5 %)  
30  
31 180 cases, a mild sensation in 147 (41 %) cases, moderate pain in 90 (23.3 %) cases, intense  
32  
33 181 pain in 14 (3.5 %) cases and unbearable pain in 2 (0.7 %) cases. The perception of pain  
34  
35 182 did not significantly differ between first and second eye procedures. Out of 155 patients  
36  
37 183 operated in their first eye 113 patients (73%), reported low pain [no or mild sensation  
38  
39 184 (score 0 or 1)], while 92 of 128 patients (72%) operated on their second eye rated their  
40  
41 185 sensations similarly (p=0.9).

42  
43  
44  
45  
46 186 **Comparison between objective and patient-assessed duration**

47  
48 187 The mean objective surgery duration was 13.9 ( $\pm$  5) minutes and the mean patient-  
49  
50 188 assessed duration was 15.3 ( $\pm$  6.9) minutes. Bland-Altman plot showed a fair agreement  
51  
52 189 between the objective and patient-assessed duration (fig 1). Mean difference (or bias)  
53  
54 190 was only 1.4 minute (95% CI, 0.63-2.15 minute). However an agreement worsening was  
55  
56 191 noted for longer procedures but error was equally distributed over and under the limits  
57  
58  
59  
60

Subjective assessment of the duration of cataract surgery

192 of agreement (-11.3-14.1 minutes). Intraclass correlation coefficient was 0.341 (95% CI,  
193 0.23-0.44) suggesting moderate agreement between the objective and patient-assessed  
194 duration.

195 A significant correlation between the objective and patient-assessed duration of the  
196 surgery was observed (Spearman's  $r = 0.452$ ,  $P < .0001$ ).

### 197 **Factors associated with objective surgery duration**

198 On univariate analysis, objective surgery duration was significantly correlated to  
199 preoperative VA ( $p=0.001$ ), time interval between wake-up and surgery ( $p=0.041$ ), and  
200 to the waiting time in the department ( $p=0.006$ ). The corresponding regression  
201 coefficients and 95 % CI are provided in table 2. Similarly, objective duration was  
202 significantly different according to surgeon experience with shorter procedures for  
203 seniors ( $13.4 \pm 4.8$  minutes) compared to juniors ( $17.8 \pm 4.7$ )(fig 2). Objective duration  
204 was significantly different according to pain-score group with significantly longer  
205 procedures in groups with high pain-scores (score 4, 3 and 2) compared to groups with  
206 low pain scores (score 0 or 1) with mean surgery durations of  $15.5 (\pm 5.7)$  and  $13.2$   
207 ( $\pm 4.5$ ) respectively (fig 3). Objective duration was significantly different between first  
208 and second eye procedures but not according to gender (table 2).

209 Multivariate analysis revealed patient preoperative visual acuity, waiting time in  
210 the department, surgeon experience and pain-score group to be independent factors  
211 associated with objective surgery duration (table 3).

### 212 **Factors associated with patient-assessed surgery duration**

213 On univariate analysis, patient-assessed surgery duration was correlated to patient age  
214 ( $p=0.011$ ), and time interval between wake-up and surgery ( $p=0.03$ ). The corresponding  
215 regression coefficients and 95% CI are provided in table 2. Similarly, patient-assessed  
216 duration was also significantly different according to surgeon experience ( $p=0.032$ ) and

Subjective assessment of the duration of cataract surgery

1  
2  
3 217 according to pain-score group (p=0.001). Conversely, patient-assessed duration was not  
4  
5 218 significantly different between first and second eye procedures or according to gender.  
6

7 219 Multivariate analysis revealed patient age, surgeon experience and pain-score  
8  
9 220 group to be independent factors associated with patient-assessed surgery duration  
10  
11 221 (table 3).  
12

13  
14 222  
15  
16  
17  
18  
19  
20  
21  
22  
23  
24  
25  
26  
27  
28  
29  
30  
31  
32  
33  
34  
35  
36  
37  
38  
39  
40  
41  
42  
43  
44  
45  
46  
47  
48  
49  
50  
51  
52  
53  
54  
55  
56  
57  
58  
59  
60

For peer review only

Subjective assessment of the duration of cataract surgery

1  
2  
3 223 **DISCUSSION**

4 224  
5 225 Our study showed that patients overall fairly estimated the duration of their surgery and  
6  
7 226 that the two independent factors associated with both the objective and subjective  
8  
9  
10 227 surgery duration were surgeon's experience and pain-score.

11 228 The objective duration of cataract surgery by modern phacoemulsification has  
12  
13  
14 229 not been the main outcome measure of previous studies, but has occasionally been  
15  
16 230 assessed mainly in analyzes of the effects of teaching or as a secondary outcome. [12 13]  
17  
18 231 When reported, the duration of surgery ranged from an average of 30 minutes in studies  
19  
20  
21 232 published in 2003 to 15-19 minutes in more recent reports.[14-17]. Our objective  
22  
23 233 measure of procedures lasting 13 minutes is in line with this shortening that most  
24  
25 234 probably stems from improvements in the technique of cataract surgery, including  
26  
27  
28 235 suture less clear corneal micro incisions. As shown previously, our data confirmed that  
29  
30 236 experienced surgeons are quicker than more junior ophthalmologists.[12 13] In our  
31  
32 237 study, the surgeon's experience factor was independently associated with both the  
33  
34  
35 238 objective and subjective surgery duration.

36  
37 239 The subjective perception of time by patients undergoing cataract surgery under  
38  
39 240 topical anaesthesia has never been studied either. Preparations for surgery include the  
40  
41 241 testing of phacoemulsifiers, applying topical anaesthesia, preoperative disinfection of  
42  
43 242 the eye by povidone-iodine, draping and placement of a lid speculum. These steps may  
44  
45  
46 243 take as long as the surgical procedure itself or even in some instances may take longer  
47  
48 244 than the surgery. From the patients' perspective distinguishing these preoperative  
49  
50 245 stages from their surgery per se may be difficult. To minimize this bias when seeking our  
51  
52  
53 246 patients' subjective assessment of the duration of their surgery, we specifically asked for  
54  
55 247 their impression of the elapsed time between the illumination of their eye under the  
56  
57 248 operating microscope until the removal of the drapes. However, this time interval both  
58  
59  
60

## Subjective assessment of the duration of cataract surgery

1  
2  
3 249 subjectively assessed and clocked by nurses may have added approximately 1 or 2 extra  
4  
5 250 minutes to the real time of the surgery, as the surgeons adjusted the focus of the  
6  
7 251 microscope and made their final preparations for the procedure.  
8

9  
10 252 The assessment of pain was a secondary outcome measure in our study and we  
11  
12 253 used the simple 5-step scale as validated in other studies.[4 9 10] A lack of sensation or a  
13  
14 254 mild sensation were reported in 72.4% of cases, moderate pain in 23.3% cases and  
15  
16 255 intense or even unbearable pain in 4.3% of cases. These percentages are comparable to  
17  
18 256 previous reports using the same 5-step pain-score scale.[9] Unsurprisingly, the  
19  
20 257 perception of pain was correlated with the duration of procedures. In our study, the  
21  
22 258 pain-score group was independently associated with both the objective and subjective  
23  
24 259 surgery duration. In a previous study patients tended to report their second eye surgery  
25  
26 260 as more painful than their first eye surgery and this finding was related to a decreased  
27  
28 261 preoperative anxiety at the time of the second procedure.[16] However, this finding was  
29  
30 262 not observed in our study, nor in another recent report.[18] This discrepancy could be  
31  
32 263 due to the preoperative sedation given to all our patients. Such medications can alter the  
33  
34 264 perception of pain as well as the perception of duration and also aim at reducing anxiety.  
35  
36 265 Similarly, we did not account for the patients' systemic medications or illnesses, if any,  
37  
38 266 which could also have altered their judgment and their pain thresholds.  
39  
40  
41  
42

43 267 Preoperative standardized grading of cataracts or pupil size was not recorded in  
44  
45 268 our study. Patient age may however be used as a surrogate parameter influencing the  
46  
47 269 grade of the cataract.[19 20] In nuclear cataracts preoperative visual acuity may also be  
48  
49 270 correlated to its grade.[21] Our data confirmed that the objective duration of surgery  
50  
51 271 was longer in cases with worse preoperative visual acuity, as more advanced cataracts  
52  
53 272 require a longer duration of ultrasonic power release.[22] Surprisingly, the age of the  
54  
55 273 patient was not correlated with objective surgery duration but with patient-assessed  
56  
57  
58  
59  
60



Subjective assessment of the duration of cataract surgery

1  
2  
3 274 surgery duration, though weakly. The chop technique may result in quicker procedures,  
4  
5 275 however the evaluation of the effect of surgical techniques on the duration of surgery  
6  
7 276 was not within the scope of our study.[23]  
8

9  
10 277 Most patients quite correctly assessed the duration of their surgery, though the  
11  
12 278 correlation with objective surgery duration was only moderate and samples were large.  
13  
14 279 Hence, we were not able to identify specific characteristics significantly associated with  
15  
16 280 an underestimation or an overestimation of time. Although evidence suggests that  
17  
18 281 fasting prior to cataract surgery under topical anaesthesia can be abandoned, in this  
19  
20 282 series patients fasted from midnight on the day prior to their surgery.[24] As our  
21  
22 283 patients were operated from 8:00 AM to 2:00 PM, fasting time varied from one case to  
23  
24 284 another, but these variations did not influence the subjective assessment of the duration  
25  
26 285 of surgery. Similarly, we thought that an early arrival and a subsequent long waiting in  
27  
28 286 the department of ophthalmology prior to entry in the operating room could be a factor  
29  
30 287 of stress resulting in an over-assessment of the duration of their surgery by patients. Yet  
31  
32 288 our analysis did not reveal that this factor played any role. We unexpectedly observed  
33  
34 289 that the time interval between wakeup and surgery, as well as waiting time in the  
35  
36 290 department, were associated with longer procedures. This might have been linked to  
37  
38 291 surgeons slowing down after a number of cases. Although it has been suggested that  
39  
40 292 handholding may reduce anxiety and the perception of pain during cataract surgery, this  
41  
42 293 was not applied in our practice.[25]  
43  
44  
45  
46  
47

48 294 Our study showed that patients overall fairly estimated the duration of their  
49  
50 295 surgery. The trend in the past decades has been towards a constant reduction of the  
51  
52 296 duration of procedures in eye surgery. As new technical improvements are under way,  
53  
54 297 such as femtosecond laser-assisted cataract surgery, the fact that patients are rather  
55  
56 298 acutely aware of the duration of procedures must be taken into consideration as an  
57  
58  
59  
60

Subjective assessment of the duration of cataract surgery

1  
2  
3 299 important parameter for their comfort. . However, proving the benefit of preoperative  
4  
5 300 counselling in terms of patient satisfaction would require a specific study beyond the  
6  
7 301 scope of this report  
8  
9  
10 302

For peer review only

1 Subjective assessment of the duration of cataract surgery

2  
3 303 **Acknowledgments**

4  
5 304 Jean-Baptiste Daudin, MD and Dominique Monnet MD, PhD provided and cared for study  
6  
7 305 patients.

8  
9 306 **Funding**

10  
11 307 The study was supported by the Association d'Ophtalmologie de Cochin, Paris, France

12  
13 308 **Competing interests**

14  
15 309 The authors have no conflict of interest related to results presented in this study.

16  
17 310

18  
19 311 **Contributorship Statement**

20  
21 312 Only the below listed authors qualify for authorship according to the ICMJE criteria:

22  
23 313 Pierre-Raphael Rothschild substantially participated in the following:

- 24  
25 314 1) Conception and design, acquisition of data, and analysis and interpretation of data  
26  
27 315 2) Drafting the article and revising it critically for important intellectual content  
28  
29 316 3) Final approval of the version to be published

30  
31 317 Sophie Grabar substantially participated in the following:

- 32  
33 318 1) Conception and design, and analysis and interpretation of data  
34  
35 319 2) Drafting the article and revising it critically for important intellectual content  
36  
37 320 3) Final approval of the version to be published

38  
39 321

40  
41 322 Brivael Le Dû substantially participated in the following:

- 42  
43 323 1) Conception and design, acquisition of data, and analysis and interpretation of data  
44  
45 324 2) Drafting the article and revising it critically for important intellectual content  
46  
47 325 3) Final approval of the version to be published

48  
49 326

50  
51 327 Cyril Temstet substantially participated in the following:

52  
53  
54  
55  
56  
57  
58  
59  
60

1  
2  
3  
4  
5  
6  
7  
8  
9  
10  
11  
12  
13  
14  
15  
16  
17  
18  
19  
20  
21  
22  
23  
24  
25  
26  
27  
28  
29  
30  
31  
32  
33  
34  
35  
36  
37  
38  
39  
40  
41  
42  
43  
44  
45  
46  
47  
48  
49  
50  
51  
52  
53  
54  
55  
56  
57  
58  
59  
60

Subjective assessment of the duration of cataract surgery

328 1) Conception and design, acquisition of data, and analysis and interpretation of data

329 2) Drafting the article and revising it critically for important intellectual content

330 3) Final approval of the version to be published

331

332 Olga Rostaqui substantially participated in the following:

333 1) Conception and design, acquisition of data

334 2) Drafting the article and revising it critically for important intellectual content

335 3) Final approval of the version to be published

336

337 Antoine P. Brézin substantially participated in the following:

338 1) Conception and design, acquisition of data, and analysis and interpretation of data

339 2) Drafting the article and revising it critically for important intellectual content

340 3) Final approval of the version to be published

341

Subjective assessment of the duration of cataract surgery

1  
2  
3 342 **REFERENCES**

- 4 343
- 5 344 1. Leaming DV. Practice styles and preferences of ASCRS members--2003 survey. J  
6  
7 345 Cataract Refract Surg 2004;**30**:892-900
- 8  
9 346 2. Fagerstrom R. Fear of a cataract operation in aged persons. Psychol Rep  
10  
11 347 1993;**72**:1339-46
- 12  
13 348 3. Nijkamp MD, Kenens CA, Dijker AJ, et al. Determinants of surgery related anxiety in  
14  
15 349 cataract patients. Br J Ophthalmol 2004;**88**:1310-4
- 16  
17 350 4. Davison M, Padroni S, Bunce C, et al. Sub-Tenon's anaesthesia versus topical  
18  
19 351 anaesthesia for cataract surgery. Cochrane Database Syst Rev 2007(3):CD006291
- 20  
21 352 5. Newman DK. Visual experience during phacoemulsification cataract surgery under  
22  
23 353 topical anaesthesia. Br J Ophthalmol 2000;**84**:13-5
- 24  
25 354 6. Yaylali V, Yildirim C, Tatlipinar S, et al. Subjective visual experience and pain level  
26  
27 355 during phacoemulsification and intraocular lens implantation under topical  
28  
29 356 anesthesia. Ophthalmologica 2003;**217**:413-6
- 30  
31 357 7. Nijkamp MD, Ruitter RA, Roeling M, et al. Factors related to fear in patients undergoing  
32  
33 358 cataract surgery: a qualitative study focusing on factors associated with fear and  
34  
35 359 reassurance among patients who need to undergo cataract surgery. Patient Educ  
36  
37 360 Couns 2002;**47**:265-72
- 38  
39 361 8. Haripriya A, Tan CS, Venkatesh R, et al. Effect of preoperative counseling on fear from  
40  
41 362 visual sensations during phacoemulsification under topical anesthesia. J Cataract  
42  
43 363 Refract Surg 2011;**37**:814-8
- 44  
45 364 9. Vielpeau I, Billotte C, Kreidie J, et al. [Comparative study between topical anesthesia  
46  
47 365 and sub-Tenon's capsule anesthesia for cataract surgery]. J Fr Ophtalmol  
48  
49 366 1999;**22**:48-51
- 50  
51  
52  
53  
54  
55  
56  
57  
58  
59  
60

## Subjective assessment of the duration of cataract surgery

- 1  
2  
3 367 10. Roman S, Auclin F, Ullern M. Topical versus peribulbar anesthesia in cataract  
4  
5 368 surgery. *J Cataract Refract Surg* 1996;**22**:1121-4  
6  
7 369 11. Bland JM, Altman DG. Statistical methods for assessing agreement between two  
8  
9 370 methods of clinical measurement. *Lancet* 1986;**1**:307-10  
10  
11 371 12. Hosler MR, Scott IU, Kunselman AR, et al. Impact of resident participation in cataract  
12  
13 372 surgery on operative time and cost. *Ophthalmology* 2012;**119**:95-8  
14  
15 373 13. Wiggins MN, Warner DB. Resident physician operative times during cataract surgery.  
16  
17 374 *Ophthalmic Surg Lasers Imaging* 2010;**41**:518-22  
18  
19 375 14. Tranos PG, Wickremasinghe SS, Sinclair N, et al. Visual perception during  
20  
21 376 phacoemulsification cataract surgery under topical and regional anaesthesia.  
22  
23 377 *Acta Ophthalmol Scand* 2003;**81**:118-22  
24  
25 378 15. Wickremasinghe SS, Tranos PG, Sinclair N, et al. Visual perception during  
26  
27 379 phacoemulsification cataract surgery under subtenons anaesthesia. *Eye (Lond)*  
28  
29 380 2003;**17**:501-5  
30  
31 381 16. Ursea R, Feng MT, Zhou M, et al. Pain perception in sequential cataract surgery:  
32  
33 382 comparison of first and second procedures. *J Cataract Refract Surg*  
34  
35 383 2011;**37**:1009-14  
36  
37 384 17. Ang CL, Au Eong KG, Lee SS, et al. Patients' expectation and experience of visual  
38  
39 385 sensations during phacoemulsification under topical anaesthesia. *Eye (Lond)*  
40  
41 386 2007;**21**:1162-7  
42  
43 387 18. Bardocci A, Ciucci F, Lofoco G, et al. Pain during second eye cataract surgery under  
44  
45 388 topical anesthesia: an intraindividual study. *Graefes Arch Clin Exp Ophthalmol*  
46  
47 389 2011;**249**:1511-4  
48  
49  
50  
51  
52  
53  
54  
55  
56  
57  
58  
59  
60

## Subjective assessment of the duration of cataract surgery

1  
2  
3  
4  
5  
6  
7  
8  
9  
10  
11  
12  
13  
14  
15  
16  
17  
18  
19  
20  
21  
22  
23  
24  
25  
26  
27  
28  
29  
30  
31  
32  
33  
34  
35  
36  
37  
38  
39  
40  
41  
42  
43  
44  
45  
46  
47  
48  
49  
50  
51  
52  
53  
54  
55  
56  
57  
58  
59  
60

- 390 19. Chylack LT, Jr., Wolfe JK, Singer DM, et al. The Lens Opacities Classification System  
391 III. The Longitudinal Study of Cataract Study Group. Arch Ophthalmol  
392 1993;**111**:831-6
- 393 20. Age-Related Eye Disease Study Research G. The age-related eye disease study  
394 (AREDS) system for classifying cataracts from photographs: AREDS report no. 4.  
395 Am J Ophthalmol 2001;**131**:167-75
- 396 21. Nangia V, Jonas JB, Sinha A, et al. Visual acuity and associated factors. The Central  
397 India Eye and Medical Study. PLoS One 2011;**6**:e22756
- 398 22. Nixon DR. Preoperative cataract grading by Scheimpflug imaging and effect on  
399 operative fluidics and phacoemulsification energy. J Cataract Refract Surg  
400 2010;**36**:242-6
- 401 23. Wong T, Hingorani M, Lee V. Phacoemulsification time and power requirements in  
402 phaco chop and divide and conquer nucleofractis techniques. J Cataract Refract  
403 Surg 2000;**26**:1374-8
- 404 24. Sanmugasunderam S, Khalfan A. Is fasting required before cataract surgery? A  
405 retrospective review. Can J Ophthalmol 2009;**44**:655-6
- 406 25. Modi N, Shaw S, Allman K, et al. Local anaesthetic cataract surgery: factors  
407 influencing perception of pain, anxiety and overall satisfaction. J Perioper Pract  
408 2008;**18**:28-33

Subjective assessment of the duration of cataract surgery

1  
2  
3 411 **TABLE AND FIGURE LEGENDS**  
4  
5  
6

7  
8  
9 412

10 413 **Table 1.** Patient population, preoperative schedule and surgical procedures.

11 414 **Table 2** Univariate analyses of factors associated with surgery duration.

12 415 **Table 3** Multivariate analyses of factors associated with surgery duration.  
13  
14  
15

16  
17  
18  
19  
20  
21  
22  
23  
24  
25  
26  
27  
28  
29  
30  
31  
32  
33  
34  
35  
36  
37  
38  
39  
40  
41  
42  
43  
44  
45  
46  
47  
48  
49  
50  
51  
52  
53  
54  
55  
56  
57  
58  
59  
60

---

417

418 **Figure 1.** Bland-Altman plot between objective and patient-assessed surgery duration.

419 The solid line indicates the mean difference (or bias); the blue and red dash lines

420 indicate the 95% and 68% limits of agreement respectively.

421 **Figure 2.** Objective surgery duration according to the surgeons' experience. The bar in

422 the box indicates the median, the cross the mean and the lower and upper hinge the

423 interquartile range. The whisker extends to the most extreme data point which is no

424 more than 1.5 times the interquartile range. Dots represent values outside the fences

425 (outliers). \*Student's t-test

426 **Figure 3.** Objective surgery duration according to the pain-score group. The bar in the

427 box indicates the median, the cross the mean and the lower and upper hinge the

428 interquartile range. The whisker extends to the most extreme data point which is no

429 more than 1.5 times the interquartile range. Dots represent values outside the fences

430 (outliers). \*Kruskal-Wallis test



Subjective assessment of the duration of cataract surgery

**Table 1 Patient population, preoperative schedule and surgical procedures**

| Variable                                                              | Value                              |
|-----------------------------------------------------------------------|------------------------------------|
| <b>Patients (n)</b>                                                   | <b>218</b>                         |
| <b>Cataract surgery cases (n)</b>                                     | <b>283</b>                         |
| <b>Age (mean years (<math>\pm</math> SD))</b>                         | <b>73.2 (<math>\pm</math> 9.3)</b> |
| <b>Gender (cases, n (%))</b>                                          |                                    |
| Male                                                                  | 132 (46.6%)                        |
| Female                                                                | 151 (53.4%)                        |
| <b>Preoperative visual acuity (Mean LogMAR (<math>\pm</math> SD))</b> | <b>0.4 (<math>\pm</math>0.2)</b>   |
| <b>Schedule on the day of surgery (hours)</b>                         |                                    |
| Fasting time, mean ( $\pm$ SD)                                        | 14 ( $\pm$ 1.8)                    |
| Time interval between wake-up and surgery, mean ( $\pm$ SD)           | 4.6 ( $\pm$ 1.2)                   |
| Waiting time in the department, mean ( $\pm$ SD)                      | 2.3 ( $\pm$ 0.7)                   |
| <b>Sequence of surgery (cases, n (%))</b>                             |                                    |
| First eye                                                             | 155 (54.8%)                        |
| Second eye                                                            | 128 (45.2%)                        |
| <b>Surgeons' experience (cases, n (%))</b>                            |                                    |
| Senior                                                                | 253 (89.4%)                        |
| Junior                                                                | 30 (10.6%)                         |
| <b>Pain assessment</b>                                                |                                    |
| Low pain-score                                                        | 205 (72,4%)                        |
| High pain-score                                                       | 78 (27,6%)                         |

431

432

## Subjective assessment of the duration of cataract surgery

433

434

**Table 2** Univariate analyses of factors associated with surgery duration.

| Variable                                  | Objective surgery duration |          | Patient-assessed surgery duration |         |
|-------------------------------------------|----------------------------|----------|-----------------------------------|---------|
|                                           | Regression                 |          | Regression                        |         |
|                                           | coefficient (95% CI)       |          | coefficient (95% CI)              |         |
|                                           | or                         | P        | or                                | P       |
|                                           | mean ( $\pm$ SD)           | Value*   | mean ( $\pm$ SD)                  | Value*  |
| Age                                       | 0.02 (-0.04-0.86)          | 0.469    | 0.11 (0.03-0.2)                   | 0.011   |
| Gender                                    |                            |          |                                   |         |
| Male                                      | 14.2 ( $\pm$ 5.2)          | 0.317    | 15.8 ( $\pm$ 6.2)                 | 0.184   |
| Female                                    | 13.6 ( $\pm$ 4.8)          |          | 14.8 ( $\pm$ 7.4)                 |         |
| Preoperative visual acuity                | 4.23 (1.75-6.72)           | 0.001    | 0 (-3.5-3.5)                      | 1.00    |
| Schedule on the day of surgery            |                            |          |                                   |         |
| Fasting time                              | 0.27 (-0.04-0.59)          | 0.091    | 0.16 (-0.28-0.60)                 | 0.477   |
| Time interval between wake-up and surgery | 0.49 (0.02-0.95)           | 0.041    | 0.71 (0.07-1.36)                  | 0.03    |
| Waiting time in the department            | 1.15 (0.34-1.96)           | 0.006    | 1.05 (-0.07-2.17)                 | 0.066   |
| Sequence of surgery                       |                            |          |                                   |         |
| First eye                                 | 14.1 ( $\pm$ 5.4)          | 0.036*   | 15.1 ( $\pm$ 6.8)                 | 0.632   |
| Second eye                                | 13.6 ( $\pm$ 4.4)          |          | 15.5 ( $\pm$ 7.0)                 |         |
| Surgeons' experience                      |                            |          |                                   |         |
| Senior                                    | 13.4 ( $\pm$ 4.8)          | <0.0001* | 15.0 ( $\pm$ 6.7)                 | 0.032*  |
| Junior                                    | 17.8 ( $\pm$ 4.7)          |          | 17.8 ( $\pm$ 7.4)                 |         |
| Pain assessment                           |                            |          |                                   |         |
| Low pain-score                            | 13.2 ( $\pm$ 4.5)          | 0.001*   | 14.4 ( $\pm$ 6.5)                 | <0.001* |
| High pain-score                           | 15.5 ( $\pm$ 5.7)          |          | 17.6 ( $\pm$ 7.3)                 |         |

435

\*Linear regression for continuous variables and Students' t-test for categorical variables.

436

## Subjective assessment of the duration of cataract surgery

437 **Table 3** Multivariate analyses of factors associated with surgery duration.

| Variable                       | Objective surgery duration |                     |        | Patient-assessed surgery duration |                     |        |
|--------------------------------|----------------------------|---------------------|--------|-----------------------------------|---------------------|--------|
|                                | Adjusted                   | 95%                 | P      | Adjusted                          | 95%                 | P      |
|                                | Regression Coefficient*    | Confidence Interval | Value  | Regression Coefficient*           | Confidence Interval | Value  |
| Age                            | -                          | -                   | -      | 0.1                               | 0 ; 0.2             | 0.022  |
| Preoperative visual acuity     | 3.6                        | 1.2; 5.9            | 0.002  | -                                 | -                   | -      |
| Waiting time in the department | 0.8                        | 0.1; 1.6            | 0.03   | -                                 | -                   | -      |
| Junior vs. senior Surgeon      | 4.1                        | 2.4; 5.9            | 0.0001 | 3.3                               | 0.8; 5.8            | 0.01   |
| Low vs. high Pain score        | -2.3                       | -3.5; -1.1          | 0.0002 | -3.1                              | -4.8; -1.4          | 0.0004 |

438 \*Regression coefficients adjusted for variables with p values &lt; 0.10 in the univariate analysis.

439

Subjective assessment of the duration of cataract surgery

**Patients' subjective assessment of the duration of cataract surgery:**

**A cohort study** **A case series**

Pierre-Raphael Rothschild<sup>1</sup> MD, Sophie Grabar<sup>2</sup> MD, PhD, Brivael Le Dû<sup>1</sup> MD\*, Cyril  
Temstet<sup>1</sup> MD\*, Olga Rostaqui<sup>1</sup> MD, Antoine P. Brézin<sup>1</sup> MD, PhD.

\* These 2 authors have equally contributed to this work

<sup>1</sup> Université Paris Descartes, Hôpital Cochin, Service d'Ophtalmologie, Assistance  
Publique Hôpitaux de Paris, 27 rue du faubourg Saint-Jacques, 75014 Paris, France.

<sup>2</sup> Université Paris Descartes, Hôpital Cochin, Service de Biostatistique et Epidémiologie,  
Assistance Publique Hôpitaux de Paris, 27 rue du faubourg Saint-Jacques, 75014 Paris,  
France.

Formatted: English (U.K.)

**Dryad provisional DOI to the submission : doi:10.5061/dryad.27sk4**

Keywords: cataract; surgical procedure; time perception; self-assessment

Presented in part at the ARVO meeting, Fort Lauderdale, Florida, USA, May 2012

Word count: Abstract 298 words; text 2397 words, 25 references, 5 figures and tables

Corresponding author and address reprint requests to Antoine P. Brézin, MD, PhD.

Université Paris Descartes, Service d'ophtalmologie, Hôpital Cochin, 27 rue du Faubourg  
Saint-Jacques, 75014 PARIS France, or at [antoine.brezin@cch.aphp.fr](mailto:antoine.brezin@cch.aphp.fr)

Formatted: English (U.K.)

Phone: 33 - 1 58412200

Fax: 33 - 1 58412210

1  
2  
3  
4 Subjective assessment of the duration of cataract surgery  
5  
6

7 **26 Article summary**

8 **27 Article focus:**

- 9  
10 1. Modern cataract surgery is a safe and quick procedure. Nonetheless it remains a  
11 stressful event from the patients' standpoint.  
12  
13 29  
14 30 2. Several factors have been recognized to participate in patients' preoperative  
15 anxiety and targeted preoperative counselling has been shown to be of value.  
16  
17 31  
18 32 3. Though cataract surgery duration is a frequent patient preoperative qualm it has  
19 not been properly studied and patient's perception of time is largely unknown.  
20  
21 33

22 **34 Key messages:**

- 23  
24 35 1. Patients' perceived cataract surgery duration is ~~rather good~~fair whatever the  
25 circumstances.  
26  
27 36  
28 37 ~~2. We encourage cataract surgeons to monitor their surgery duration and inform~~  
29 ~~their patients accordingly.~~  
30  
31 38  
32 39 ~~3.2.~~ Surgeons' experience and pain perception were the two factors  
33 independently associated with surgery duration.  
34  
35 40

36 **41 Strengths and limitations:**

- 37  
38 42 1. The large studied population and the strict definition used for operative time  
39 provide reliable measurements of the surgery duration whether objective or  
40  
41 43 patient perceived.  
42  
43 44  
44 45 ~~2. Preoperative and intraoperative Anxiety status, chronic illnesses, systemic~~  
45 ~~medications score evaluation~~ ~~were~~as not part of our standardized study protocol.  
46  
47 46  
48 47 ~~Moreover all our patients were on sedative medications at the time of surgery.~~  
49  
50 48 This might have ~~been associated with objective or~~affected patients' perceptions  
51  
52 49 ~~assessed surgery duration.~~  
53  
54  
55  
56  
57  
58  
59  
60

1  
2  
3  
4 Subjective assessment of the duration of cataract surgery  
5

6  
7 50 | 2.3. The benefit in terms of patient comfort/satisfaction of preoperative  
8 | information regarding surgery duration needs specific studied beyond the scope  
9 | of the present study.  
10 |  
11 |  
12 |  
13 |  
14 |  
15 |  
16 |  
17 |  
18 |  
19 |  
20 |  
21 |  
22 |  
23 |  
24 |  
25 |  
26 |  
27 |  
28 |  
29 |  
30 |  
31 |  
32 |  
33 |  
34 |  
35 |  
36 |  
37 |  
38 |  
39 |  
40 |  
41 |  
42 |  
43 |  
44 |  
45 |  
46 |  
47 |  
48 |  
49 |  
50 |  
51 |  
52 |  
53 |

1  
2  
3  
4 Subjective assessment of the duration of cataract surgery

5  
6  
7 54 **Objectives:** Surgery duration is a source of preoperative anxiety for patients undergoing  
8  
9 55 cataract surgery. To better inform patients we evaluated the agreement between  
10  
11 56 objective and patient perceived surgery duration.

12 57 **Design:** ~~cohort study~~ case series.

13  
14 58 **Setting:** Public teaching university hospital (Paris, France).

15  
16 59 **Participants:** During the study period, 368 cataract surgery cases performed on 285  
17  
18 60 286 patients were included, 985 cases/patients were excluded from the final analysis.

19  
20 61 All patients who had uneventful phacoemulsification were included. Cases with any  
21  
22 62 significant intraoperative adverse event or cases requiring additional anaesthesia other  
23  
24 63 than topical were excluded. Resident performed cases were also excluded. All cases  
25  
26 64 performed by phacoemulsification under topical anaesthesia were included. Cases for  
27  
28 65 which any adverse event prolonged the procedure by 10 minutes or more were  
29  
30 66 excluded.

31  
32 67 **Primary and secondary outcomes:** Procedures were timed (objective duration) and  
33  
34 68 patients were asked, immediately afterwards, to assess the duration of their surgery  
35  
36 69 (patient-assessed duration). The agreement between objective and patient-assessed  
37  
38 70 duration as well as influencing factors was studied.

39  
40 71 **Results:** Median objective duration (13.9 ± 5.6 minutes) and patient-assessed  
41  
42 72 duration (15.3 ± 6.9 minutes) were significantly correlated (Pearson's Spearman's  $r =$   
43  
44 73 0.45268,  $P < .0001$ ). ~~Furthermore~~ Furthermore, Bland-Altman analysis and the intraclass  
45  
46 74 correlation coefficient (0.34144, 95% CI, 0.2336-0.4453) showed a fair agreement. On  
47  
48 75 univariate analysis senior-performed procedures were significantly shorter (12.6  
49  
50 76 minutes) than those performed by juniors (13.4 versus 17.8 minutes,  $P = .0001$ ) ~~or~~  
51  
52 77 residents, 18.2 and 17 minutes, respectively ( $P = .0001$ ). Pain was recorded as "no  
53  
54 78 sensation" (29.531.5 % of the cases), "mild sensation" (41%), "moderate pain" (2523.3

1  
2  
3  
4 Subjective assessment of the duration of cataract surgery

5  
6  
7 79 | %), “intense pain” (3.3.5.9%) and “unbearable pain” (0.7.6%). Groups with high pain-  
8  
9 80 | score had significantly longer procedures ( $P < .00001$ ). Multivariate analysis revealed  
10  
11 81 | that the only independent factors associated with both the objective and patient-  
12  
13 82 | assessed duration of surgery was surgeon’s experience and pain-score.

14 83 | **Conclusions:** Patients fairly estimated the duration of their surgery in our study,

15  
16 84 | suggesting that emotions associated with eye surgery under topical

Formatted: English (U.K.)

17  
18 85 | ~~anesthesia anaesthesia~~ did not hinder patients’ perception of time. ~~We encourage~~

Formatted: English (U.K.)

19  
20 86 | ~~cataract surgeons to monitor their own surgical duration to better inform their patients.~~

21  
22 87 | However, the benefit of preoperative counselling regarding the duration of surgery will

23  
24 88 | need further evaluation. The benefit of preoperative counseling will need further

Formatted: Font: Not Bold, No underline

25  
26 89 | evaluation by validated anxiety scales.

Formatted: English (U.K.)



1  
2  
3  
4 Subjective assessment of the duration of cataract surgery  
5

6  
7 90 **INTRODUCTION**  
8  
9 91

10 92 The shortened duration of cataract surgery is one of the striking features owing to the  
11 93 improvement of surgical techniques. Live surgery events and real-time surgical video  
12 94 recordings by elite surgeons nowadays seldom show procedures lasting more than 10  
13 95 minutes. The quickness of modern cataract surgery by phacoemulsification has made  
14 96 topical anaesthesia, whose effects wear off faster than previously used peribulbar  
15 97 injections, the method of choice for analgesia.[1] Nevertheless, whatever the amount of  
16 98 trust patients put in their surgeon, many remain apprehensive of eye surgery under full  
17 99 consciousness or with minimal sedation by systemic administration of drugs. This  
18 100 apprehension is often focused on the fear of involuntary eye movements during the  
19 101 procedure, which may complicate the surgeon's task, on patients' fear of seeing their eye  
20 102 surgery or on the fear of painful sensations. In reply, quite abundant data are now  
21 103 available stemming from several studies focused on the impressions of patients during  
22 104 the procedures.[2 3] Various methods to assess the perception of pain have been used  
23 105 and have validated that cataract surgery under topical anaesthesia is by and large  
24 106 usually a painless procedure.[4] Visual sensations experienced by patients under the  
25 107 operating microscope have also been recorded and have mostly been found to be of no  
26 108 concern.[5 6] In addition to these topics, patients prior to their surgery have frequent  
27 109 qualms regarding the duration of the procedure and hence regarding their ability to  
28 110 withstand their eye surgery under topical anaesthesia.[7] Providing **additional targeted**  
29 111 information to patients undergoing cataract surgery has been shown to **relieve**  
30 112 **preoperative anxiety** **improve their satisfaction**.[8]  
31 113 This information **should-could** include data regarding the duration of the procedure.  
32 114 However, surprisingly, in contrast to the common nature of cataract surgery by modern

Field Code Changed

1  
2  
3  
4 Subjective assessment of the duration of cataract surgery  
5

6  
7 115 phacoemulsification, there is scarce data regarding its duration. The purpose of this  
8  
9 116 study was therefore to compare the objective duration of cataract surgery with the  
10  
11 117 patients' subjective assessment of this duration.  
12

13 118  
14  
15  
16  
17  
18  
19  
20  
21  
22  
23  
24  
25  
26  
27  
28  
29  
30  
31  
32  
33  
34  
35  
36  
37  
38  
39  
40  
41  
42  
43  
44  
45  
46  
47  
48  
49  
50  
51  
52  
53  
54  
55  
56  
57  
58  
59  
60

For peer review only

1  
2  
3  
4 Subjective assessment of the duration of cataract surgery  
5

6  
7 119 **METHODS**

8  
9 120  
10 121 The study was set in the department of ophthalmology of Hôpital Cochin, a teaching  
11 122 university hospital located in Paris, France. Data were collected prospectively in  
12 123 consecutive patients operated between May 17, 2011 and July 22, 2011.

15 124 All patients who had uneventful phacoemulsification under topical anaesthesia ~~or~~  
16 125 ~~sub-Tenon's block~~ with placement of an intraocular lens in the capsular bag were  
17 126 included. Cases with any "significant adverse event" defined either by a major  
18 127 intraoperative complication such as vitreous loss or by a technical problem such as  
19 128 phacoemulsifier malfunction that prolonged the procedure by 10 minutes or more were  
20 129 excluded. Similarly, patients who required any anaesthesia in addition to topical  
21 130 lidocaine 2% gel, or those who required sedation in addition to the preoperatively given  
22 131 hydroxyzine were excluded from the analyses. Teaching cases involving resident  
23 132 participation were also excluded from the analyses. -The duration of the procedure,  
24 133 referred throughout the text as the objective duration, was timed by operating room  
25 134 nurses as the exposure of the patients' eye to the light of the operating microscope, from  
26 135 the beginning until the end of the surgery. ~~Cases for which any adverse event prolonged~~  
27 136 ~~the procedure by 10 minutes or more were excluded.~~

28 137 The objective duration of surgery was compared to its subjective assessment  
29 138 obtained by questioning patients immediately after drape removal and referred  
30 139 throughout the text as the patient-assessed duration. If the initial patients' replies were  
31 140 imprecise, a second line of questioning was used requesting patients to assess the  
32 141 duration of their surgery by the minute. To avoid assessment biases, patients were not  
33 142 warned before the surgery that they would be asked to assess the duration of their  
34 143 procedure.

Formatted: English (U.K.)

Formatted: English (U.K.)

1  
2  
3  
4 Subjective assessment of the duration of cataract surgery  
5

6  
7 144 The patients' perception of pain during surgery was also assessed with a  
8  
9 145 standard numeric scale, graded from 0 to 4: 0 (no pain), 1 (mild sensation), 2 (moderate  
10  
11 146 pain), 3 (intense pain), 4 (unbearable pain) as previously used in other studies.[4 9 10]

Field Code Changed

12  
13 147 Other factors were also recorded: age, gender, first or second eye surgery, and  
14  
15 148 best corrected preoperative visual acuity. All surgeries were performed between 8:00  
16  
17 149 AM and 2:00 PM and the patients were requested to fast from midnight on the night  
18  
19 150 prior to their surgery. The patients' preoperative schedules were recorded: duration of  
20  
21 151 fasting, time interval between wake-up and surgery, time interval between entry in the  
22  
23 152 department suite and surgery (waiting time in the department). All patients received 0.5  
24  
25 153 mg/kg of hydroxyzine at their time of arrival in our department used as sedative and  
26  
27 154 additive sedation during the surgery when necessary. No other drug was given  
28  
29 155 preoperatively, including non-steroidal anti-inflammatory drugs. The need for  
30  
31 156 additional anaesthetic techniques was recorded.

Formatted: English (U.K.)

32  
33 157 ~~Eight surgeons participated in the study.~~ Surgeons were categorized as seniors  
34  
35 158 when they had the experience of more than 1000 procedures performed prior to the  
36  
37 159 study or as juniors otherwise. ~~Procedures performed by residents (either partially or~~  
38  
39 160 ~~fully) for teaching purposes were also distinctly analyzed.~~

40  
41 161 ~~Three phacoemulsifiers were used: Infiniti® (Alcon, Inc), Stellaris® (Bausch &~~  
42  
43 162 ~~Lomb, USA) and Whitestar Signature® (Abbott Medical Optics Inc., Santa Anna, USA).~~

44 163

#### 45 46 164 **Statistical analysis**

47 165 Categorical variables are expressed as numbers (percentages) and comparisons were  
48  
49 166 conducted using the Fisher-exact test. For continuous variables, mean  $\pm$  standard  
50  
51 167 deviation (SD) or median (interquartile range, IQR) are provided, and comparisons were  
52  
53 168 conducted using the Kruskal-Wallis test or the student's t-test.

1  
2  
3  
4 Subjective assessment of the duration of cataract surgery

5  
6  
7 169 To evaluate the agreement between objective and patient-assessed duration, a Bland-  
8  
9 170 Altman plot was used,<sup>[11]</sup> The differences between the two methods (i.e. objective and  
10  
11 171 patient-assessed duration) are plotted against their mean. The Bland-Altman analysis  
12  
13 172 provides the mean difference (also called bias) as well as the ~~95% or the 68%~~ limits of  
14  
15 173 agreement corresponding ~~respectively to the mean -difference ± 2 SD or ±1 SD~~ the 95%  
16  
17 174 ~~confidence interval (CI) of the mean difference~~. When agreement between the two  
18  
19 175 methods is good, most of the differences should reside within the ~~agreement limit~~  
20  
21 176 interval. We also computed the Intraclass correlation coefficient to quantitatively  
22  
23 177 evaluate the agreement.

24  
25 178 Correlation tests were conducted using the ~~Pearson's-Spearman's~~ correlation coefficient  
26  
27 179 (r). Factors with *P* values <.10 in the univariate analysis were included in a multivariate  
28  
29 180 ~~linear regression and model (ANCOVA)~~ model to determine the independent factors  
30  
31 181 associated with either objective or patient-assessed surgery duration. *P* Values <0.05  
32  
33 182 were considered significant. All analyses were performed with XLSTAT 2012.2.02  
34  
35 183 software (Addinsoft, Paris, France).

36 184  
37  
38  
39  
40  
41  
42  
43  
44  
45  
46  
47  
48  
49  
50  
51  
52  
53  
54  
55

Field Code Changed

Subjective assessment of the duration of cataract surgery

## RESULTS

A total of ~~283359~~ cases performed in ~~218277~~ patients was analyzed after exclusion of ~~985 cases (65 patients)~~. ~~Nine cases were excluded for significant intraoperative adverse event including posterior capsular break or zonular disinsertion (8 cases) and phacoemulsifier breakdown (1 case)~~. ~~Four~~ out the 8 cases presenting intraoperative vitreous loss had an identifiable risk factor for this complication, two were traumatic cataracts, ~~two~~ and two were cataracts related to severe pseudoexfoliation syndrome. ~~Thirteen other cases required additional anaesthesia or sedation and were therefore excluded. Those included sub-Tenon's block (5 cases), sub-conjunctival injection (1 case), intracameral injection of lidocaine (1 case) and midazolam intravenous sedation (6 cases)~~. ~~Finally 70 cases involving resident participation were excluded~~. Characteristics of the study population, patients' schedule on the day of surgery, sequence of procedures, phacoemulsifiers used and surgery duration are shown in table 1.

~~Topical anaesthesia alone was used in 350 cases, the remaining cases required the addition of sub-Tenon's block (2 cases), sub-conjunctival injection (1 case), intracameral injection of lidocaine (1 case) and midazolam intravenous sedation (5 cases)~~. No sensation was reported in 106 (~~29~~31.5%) cases, a mild sensation in 147 (41%) cases, moderate pain in 90 (~~22~~3.5%) cases, intense pain in 14 (3.59%) cases and unbearable pain in 2 (0.76%) cases. The perception of pain did not significantly differ between first and second eye procedures (~~p=0.34~~). ~~Out of 155 patients operated in their first eye 113 patients (73%), reported low pain [no or mild sensation (score 0 or 1)], while 92 of 128 patients (72%) operated on their second eye rated their sensations similarly (p=0.9)~~.

### Comparison between objective and patient-assessed duration

Subjective assessment of the duration of cataract surgery

210 The ~~median-mean~~ objective surgery duration was 13.9 ( $\pm$  5)-6 minutes (~~interquartile~~  
 211 ~~range 11.1 to 17.5 minutes~~) and the ~~meandian~~ patient-assessed duration was 15.3 ( $\pm$   
 212 ~~6.9~~) minutes (~~interquartile range 11 to 20 minutes~~). Bland-Altman plot showed a fair  
 213 agreement between the objective and patient-assessed duration (fig 1). Mean difference  
 214 (or bias) was only 1.40-92 minute (95% CI, 0.6322-2.151-62 minute). However an  
 215 agreement worsening was noted for longer procedures but error was equally  
 216 distributed over and under the limits of agreement (~~-11.312-3~~-14.12 minutes). Intraclass  
 217 correlation coefficient was 0.34144 (95% CI, 0.2336-0.4453) ~~further~~-suggesting a  
 218 ~~fair~~moderate agreement between the objective and patient-assessed duration.

219 A significant correlation between the objective and patient-assessed duration of the  
 220 surgery was observed (~~Spearman's r = 0.452, P <.0001~~~~Pearson's r = 0.468, p<0.0001~~).

Formatted: Font: Not Bold, Font color: Auto

#### 221 Factors associated with objective surgery duration

222 On univariate analysis, objective surgery duration was significantly correlated to  
 223 preoperative VA (p=0.001-0004), ~~duration of fasting (p=0.014)~~, time interval between  
 224 wake-up and surgery (p=0.041004), and ~~to the~~ waiting time in the department  
 225 (p=0.006<0.0001). The corresponding ~~Pearson's regression correlation~~-coefficients ~~and~~  
 226 ~~95 % CI~~ are provided in table 2. Similarly, objective duration was significantly different  
 227 according to surgeon experience with shorter procedures for seniors (13.4  $\pm$  4.82-6  
 228 minutes) compared to juniors (17.8  $\pm$  4.7) ~~or residents, 18.2 and 17 minutes respectively~~  
 229 (fig 2). ~~The two latter durations were not significantly different (p=0.70)~~. Objective  
 230 duration was significantly different according to pain-score group with significantly  
 231 longer procedures in groups with higher pain-scores (~~score 4, 3 and 2~~) compared to  
 232 ~~groups with low pain scores (score 0 or 1) with mean surgery durations of 15.5 ( $\pm$ 5.7)~~  
 233 ~~and 13.2 ( $\pm$ 4.5) respectively~~ (fig 3). ~~Conversely, objective~~Objective duration was not

1  
2  
3  
4 Subjective assessment of the duration of cataract surgery

5  
6  
7 234 | significantly different between first and second eye procedures ~~but not~~ according to  
8 235 | gender (table 2). ~~(p=0.365 and p=0.925, respectively).~~

9  
10 236 | Multivariate analysis revealed patient preoperative visual acuity, waiting time in  
11  
12 237 | the department, surgeon experience and pain-score group to be independent factors  
13  
14 238 | associated with objective surgery duration (table 32).

15  
16 239 | **Factors associated with patient-assessed surgery duration**

17  
18 240 | On univariate analysis, patient-assessed surgery duration was correlated to patient age  
19  
20 241 | (p=0.0110), and time interval between wake-up and surgery (p=0.0312), and waiting  
21  
22 242 | time in the department (p<0.029). The corresponding Pearson's correlation regression  
23  
24 243 | coefficients and 95% CI are provided in table 2.

25  
26 244 | Similarly, patient-assessed duration was also significantly different according to surgeon  
27  
28 245 | experience (p=0.032001) and according to pain-score group (p=0.00102).  
29  
30 246 | Conversely, patient-assessed duration was not significantly different between first and  
31  
32 247 | second eye procedures or according to gender. ~~(p=0.340 and p=0.298, respectively).~~

33  
34 248 | Multivariate analysis revealed patient age, surgeon experience and pain-score  
35  
36 249 | group to be independent factors associated with patient-assessed surgery duration  
37  
38 250 | (table 32).

39  
40 251

Formatted: Font color: Auto



1  
2  
3  
4 Subjective assessment of the duration of cataract surgery  
5

6  
7 252 **DISCUSSION**  
8 253

9 254 Our study showed that patients overall fairly estimated the duration of their surgery and  
10 255 that the two independent factors associated with both the objective and subjective  
11 256 surgery duration were surgeon's experience and pain-score.  
12

13  
14 257 The objective duration of cataract surgery by modern phacoemulsification has  
15 258 not been the main outcome measure of previous studies, but has occasionally been  
16 259 assessed mainly in analyzes of the effects of teaching or as a secondary outcome. [12 13]

Field Code Changed

20 260 When reported, the duration of surgery ranged from an average of 30 minutes in studies  
21 261 published in 2003 to 15-19 minutes in more recent reports,[14-17]. Our objective

Field Code Changed

23 262 measure of procedures lasting 13 minutes is in line with tThis shortening that most  
24 263 probably stems from improvements in the technique of cataract surgery, including  
25 264

26 264 ~~suture less clear corneal micro incisions. Our objective measure of procedures lasting~~  
27 265 ~~13.6 minutes (median duration) was longer than observed in the hands of some elite~~  
28 266 ~~cataract surgeons. Yet, our measures included procedures performed partially or~~  
29 267 ~~completely by residents and by junior surgeons.~~ As shown previously, our data

30 268 confirmed that experienced surgeons are quicker than more junior ophthalmologists.[12  
31 269 13] In our study, the surgeon's experience factor was independently associated with  
32 270 both the objective and subjective surgery duration.  
33

Field Code Changed

34 271 The subjective perception of time by patients undergoing cataract surgery under  
35 272 topical anaesthesia has never been studied either. Preparations for surgery include the  
36 273 testing of phacoemulsifiers, applying topical anaesthesia, preoperative disinfection of  
37 274 the eye by povidone-iodine, draping and placement of a lid speculum. These steps may  
38 275 take as long as the surgical procedure itself or even in some instances may take longer  
39 276 than the surgery. From the patients' perspective distinguishing these preoperative  
40 277 stages from their surgery per se may be difficult. To minimize this bias when seeking our  
41

1  
2  
3  
4 Subjective assessment of the duration of cataract surgery

5  
6  
7 278 patients' subjective assessment of the duration of their surgery, we specifically asked for  
8  
9 279 their impression of the elapsed time between the illumination of their eye under the  
10  
11 280 operating microscope until the removal of the drapes. However, this time interval both  
12  
13 281 subjectively assessed and clocked by nurses may have added approximately 1 or 2 extra  
14  
15 282 minutes to the real time of the surgery, as the surgeons adjusted the focus of the  
16  
17 283 microscope and made their final preparations for the procedure.

18 284 The assessment of pain was a secondary outcome measure in our study and we  
19  
20 285 used the simple 5-step scale as validated in other studies.[4 9 10] A lack of sensation or a  
21  
22 286 mild sensation were reported in ~~72.40.2%~~ of cases, moderate pain in ~~23.35.4%~~ cases  
23  
24 287 and intense or even unbearable pain in ~~4.34%~~ of cases. These percentages are  
25  
26 288 comparable to previous reports using the same 5-step pain-score scale,[9]

27  
28 289 Unsurprisingly, the perception of pain was correlated with the duration of procedures.  
29  
30 290 In our study, the pain-score group was independently associated with both the objective  
31  
32 291 and subjective surgery duration. In ~~asome~~ previous studies ~~ies~~ patients tended to report  
33  
34 292 their second eye surgery as more painful than their first eye ~~surgery and this finding was~~  
35  
36 293 ~~related to a decreased preoperative anxiety at the time of the second procedure.~~[16]

37  
38 294 However, this finding was not observed in our study, nor in another recent report,[18]  
39  
40 295 ~~This discrepancy could be due to the preoperative sedation given to all our patients.~~  
41  
42 296 ~~Such medications can alter the perception of pain as well as the perception of duration~~  
43  
44 297 ~~and also aim at reducing anxiety. Similarly, we did not account for the patients' systemic~~  
45  
46 298 ~~medications or illnesses, if any, which could also have altered their judgment and their~~  
47  
48 299 ~~pain thresholds.~~

49  
50 300 Preoperative standardized grading of cataracts ~~or pupil size was not was not~~  
51  
52 301 ~~performed in recorded in~~ our study. Patient age may however be used as a surrogate  
53  
54 302 parameter influencing the grade of the cataract,[19 20] In nuclear cataracts preoperative

Field Code Changed

Field Code Changed

Field Code Changed

Field Code Changed

Formatted: Font: Not Bold, Font color: Auto, English (U.K.)

Field Code Changed

1  
2  
3  
4 Subjective assessment of the duration of cataract surgery

5  
6  
7 303 visual acuity may also be correlated to its grade,[21] Our data confirmed that the

Field Code Changed

8  
9 304 objective duration of surgery was longer in cases with worse preoperative visual acuity,

10  
11 305 as more advanced cataracts require a longer duration of ultrasonic power release,[22]

Field Code Changed

12  
13 306 ~~Surprisingly, the age of the patient was not correlated with objective surgery duration~~

14  
15 307 ~~but with patient-assessed surgery duration, though weakly~~ Surprisingly patient's age

16  
17 308 ~~was not correlated with objective surgery duration but instead with patient-assessed~~

18  
19 309 ~~surgery duration.~~ The chop technique may result in quicker procedures, however the

20  
21 310 evaluation of the effect of surgical techniques on the duration of surgery was not within

22  
23 311 the scope of our study,[23]

Field Code Changed

24  
25 312 ~~Most patients quite correctly assessed the duration of their surgery, though the~~

26  
27 313 ~~correlation with objective surgery duration was only moderate and samples were large.~~

28  
29 314 ~~As the majority of patients quite correctly assessed the duration of their surgery, Hence,~~

30  
31 315 we were not able to identify specific characteristics significantly associated with an

32  
33 316 underestimation or an overestimation of time. Although evidence suggests that fasting

34  
35 317 prior to cataract surgery under topical anaesthesia can be abandoned, in this series

36  
37 318 patients fasted from midnight on the day prior to their surgery,[24] As our patients were

Field Code Changed

38  
39 319 operated from 8:00 AM to 2:00 PM, fasting time varied from one case to another, but

40  
41 320 these variations did not influence the subjective assessment of the duration of surgery.

42  
43 321 Similarly, we thought that an early arrival and a subsequent long waiting in the

44  
45 322 department of ophthalmology prior to entry in the operating room could be a factor of

46  
47 323 stress resulting in an over-assessment of the duration of their surgery by patients. Yet

48  
49 324 our analysis did not reveal that this factor played any role. We unexpectedly observed

50  
51 325 that ~~the duration of fasting and~~ the time interval between wakeup and surgery, as well

52  
53 326 as waiting time in the department, were associated with longer procedures. This might

54  
55 327 have been linked to surgeons slowing down after a number of ~~cases-cases and/or a trend~~

56  
57  
58  
59  
60  
16

1  
2  
3  
4 Subjective assessment of the duration of cataract surgery  
5

6 328 ~~to schedule teaching cases at the end rather than at the beginning of surgical sessions,~~  
7

8 329 Although it has been suggested that handholding may reduce anxiety and the perception  
9

10 330 of pain during cataract surgery, this was not applied in our practice.[25]

Field Code Changed

11 331 Our study showed that patients overall fairly estimated the duration of their  
12

13 332 surgery. The trend in the past decades has been towards a constant reduction of the  
14

15 333 duration of procedures in eye surgery. As new technical improvements are under way,  
16

17 334 such as femtosecond laser-assisted cataract surgery, the fact that patients are rather  
18

19 335 acutely aware of the duration of procedures must be taken into consideration as an  
20

21 336 important parameter for their comfort. ~~. However, proving the benefit of preoperative~~  
22

23 337 ~~counselling in terms of patient satisfaction would require a specific study beyond the~~  
24

25 338 ~~scope of this report~~  
26

27 339  
28  
29  
30  
31  
32  
33  
34  
35  
36  
37  
38  
39  
40  
41  
42  
43  
44  
45  
46  
47  
48  
49  
50  
51  
52  
53  
54  
55  
56  
57  
58  
59  
60

Formatted: Font: Not Bold, Font color: Auto

1  
2  
3  
4 Subjective assessment of the duration of cataract surgery  
5

6  
7 **340 Acknowledgments**

8  
9 **341** Jean-Baptiste Daudin, MD and Dominique Monnet MD, PhD provided and cared for study  
10  
11 **342** patients.

**Formatted:** Font: Not Bold, Font color: Auto

12 **343 Funding**

**Formatted:** English (U.K.)

13  
14 **344** The study was supported by the Association d'Ophtalmologie de Cochin, Paris, France

**Formatted:** Font: Not Bold, Font color: Auto

15  
16 **345 Competing interests**

**Formatted:** English (U.K.)

17  
18 **346** The authors have no conflict of interest related to results presented in this study.  
19

**Formatted:** Font: Not Bold, Font color: Auto

20 **347**

21  
22 **348 Contributorship Statement**

23  
24 **349** Only the below listed authors qualify for authorship according to the ICMJE criteria:

**Formatted:** Font: Not Bold, Font color: Auto

25  
26 **350** Pierre-Raphael Rothschild substantially participated in the following:

**Formatted:** Font: Not Bold, Font color: Auto

27  
28 **351** 1) ~~conception~~Conception and design, acquisition of data, and analysis and interpretation

**Formatted:** Font: Not Bold, Font color: Auto

29  
30 **352** of data

31  
32 **353** 2) ~~drafting~~Drafting the article and revising it critically for important intellectual content

**Formatted:** Font: Not Bold, Font color: Auto

33  
34 **354** 3) ~~final~~Final approval of the version to be published

**Formatted:** Font: Not Bold, Font color: Auto

35  
36 **355** Sophie Grabar substantially participated in the following:

**Formatted:** Font: Not Bold, Font color: Auto

37  
38 **356** 1) ~~conception~~Conception and design, and analysis and interpretation of data

**Formatted:** Font: Not Bold, Font color: Auto

39  
40 **357** 2) ~~drafting~~Drafting the article and revising it critically for important intellectual content

**Formatted:** Font: Not Bold, Font color: Auto

41  
42 **358** 3) ~~final~~Final approval of the version to be published

**Formatted:** Font: Not Bold, Font color: Auto

43  
44 **359**

45  
46 **360** Brivael Le Dû substantially participated in the following:

**Formatted:** Font: Not Bold, Font color: Auto

47  
48 **361** 1) ~~conception~~Conception and design, acquisition of data, and analysis and interpretation

**Formatted:** Font: Not Bold, Font color: Auto

49  
50 **362** of data

51  
52 **363** 2) ~~drafting~~Drafting the article and revising it critically for important intellectual content

**Formatted:** Font: Not Bold, Font color: Auto

53  
54 **364** 3) ~~final~~Final approval of the version to be published

**Formatted:** Font: Not Bold, Font color: Auto

Subjective assessment of the duration of cataract surgery

365

Cyril Temstet substantially participated in the following:

Formatted: Font: Not Bold, Font color: Auto

1) ~~conception~~Conception and design, acquisition of data, and analysis and interpretation

Formatted: Font: Not Bold, Font color: Auto

of data

2) ~~drafting~~Drafting the article and revising it critically for important intellectual content

Formatted: Font: Not Bold, Font color: Auto

3) ~~final~~Final approval of the version to be published

Formatted: Font: Not Bold, Font color: Auto

371

Olga Rostaqui substantially participated in the following:

Formatted: Font: Not Bold, Font color: Auto

1) ~~conception~~Conception and design, acquisition of data

Formatted: Font: Not Bold, Font color: Auto

2) ~~drafting~~Drafting the article and revising it critically for important intellectual content

Formatted: Font: Not Bold, Font color: Auto

3) ~~final~~Final approval of the version to be published

Formatted: Font: Not Bold, Font color: Auto

376

Antoine P. Brézin substantially participated in the following:

Formatted: Font: Not Bold, Font color: Auto

1) ~~conception~~Conception and design, acquisition of data, and analysis and interpretation

Formatted: Font: Not Bold, Font color: Auto

of data

2) ~~drafting~~Drafting the article and revising it critically for important intellectual content

Formatted: Font: Not Bold, Font color: Auto

3) ~~final~~Final approval of the version to be published

Formatted: Font: Not Bold, Font color: Auto

382

Formatted: Font: Not Bold, Font color: Auto

1  
2  
3  
4 Subjective assessment of the duration of cataract surgery  
5

6  
7 383 **REFERENCES**  
8 384

- 9 385 1. Leaming DV. Practice styles and preferences of ASCRS members--2003 survey. J  
10 386 Cataract Refract Surg 2004;**30**:892-900  
11  
12 387 2. Fagerstrom R. Fear of a cataract operation in aged persons. Psychol Rep  
13  
14 388 1993;**72**:1339-46  
15  
16 389 3. Nijkamp MD, Kenens CA, Dijker AJ, et al. Determinants of surgery related anxiety in  
17  
18 390 cataract patients. Br J Ophthalmol 2004;**88**:1310-4  
19  
20 391 4. Davison M, Padroni S, Bunce C, et al. Sub-Tenon's anaesthesia versus topical  
21  
22 392 anaesthesia for cataract surgery. Cochrane Database Syst Rev 2007(3):CD006291  
23  
24 393 5. Newman DK. Visual experience during phacoemulsification cataract surgery under  
25  
26 394 topical anaesthesia. Br J Ophthalmol 2000;**84**:13-5  
27  
28 395 6. Yaylali V, Yildirim C, Tatlipinar S, et al. Subjective visual experience and pain level  
29  
30 396 during phacoemulsification and intraocular lens implantation under topical  
31  
32 397 anaesthesia. Ophthalmologica 2003;**217**:413-6  
33  
34 398 7. Nijkamp MD, Ruiters RA, Roeling M, et al. Factors related to fear in patients undergoing  
35  
36 399 cataract surgery: a qualitative study focusing on factors associated with fear and  
37  
38 400 reassurance among patients who need to undergo cataract surgery. Patient Educ  
39  
40 401 Couns 2002;**47**:265-72  
41  
42 402 8. Haripriya A, Tan CS, Venkatesh R, et al. Effect of preoperative counseling on fear from  
43  
44 403 visual sensations during phacoemulsification under topical anesthesia. J Cataract  
45  
46 404 Refract Surg 2011;**37**:814-8  
47  
48 405 9. Vielpeau I, Billotte C, Kreidie J, et al. [Comparative study between topical anesthesia  
49  
50 406 and sub-Tenon's capsule anesthesia for cataract surgery]. J Fr Ophtalmol  
51  
52 407 1999;**22**:48-51  
53  
54  
55  
56  
57  
58  
59  
60

Formatted: Font: Not Bold, Font color: Auto

## Subjective assessment of the duration of cataract surgery

- 1  
2  
3  
4  
5  
6  
7 408 10. Roman S, Auclin F, Ullern M. Topical versus peribulbar anesthesia in cataract  
8  
9 409 surgery. *J Cataract Refract Surg* 1996;**22**:1121-4  
10  
11 410 11. Bland JM, Altman DG. Statistical methods for assessing agreement between two  
12  
13 411 methods of clinical measurement. *Lancet* 1986;**1**:307-10  
14  
15 412 12. Hosler MR, Scott IU, Kunselman AR, et al. Impact of resident participation in cataract  
16  
17 413 surgery on operative time and cost. *Ophthalmology* 2012;**119**:95-8  
18  
19 414 13. Wiggins MN, Warner DB. Resident physician operative times during cataract surgery.  
20  
21 415 *Ophthalmic Surg Lasers Imaging* 2010;**41**:518-22  
22  
23 416 14. Tranos PG, Wickremasinghe SS, Sinclair N, et al. Visual perception during  
24  
25 417 phacoemulsification cataract surgery under topical and regional anaesthesia.  
26  
27 418 *Acta Ophthalmol Scand* 2003;**81**:118-22  
28  
29 419 15. Wickremasinghe SS, Tranos PG, Sinclair N, et al. Visual perception during  
30  
31 420 phacoemulsification cataract surgery under subtenons anaesthesia. *Eye (Lond)*  
32  
33 421 2003;**17**:501-5  
34  
35 422 16. Ursea R, Feng MT, Zhou M, et al. Pain perception in sequential cataract surgery:  
36  
37 423 comparison of first and second procedures. *J Cataract Refract Surg*  
38  
39 424 2011;**37**:1009-14  
40  
41 425 17. Ang CL, Au Eong KG, Lee SS, et al. Patients' expectation and experience of visual  
42  
43 426 sensations during phacoemulsification under topical anaesthesia. *Eye (Lond)*  
44  
45 427 2007;**21**:1162-7  
46  
47 428 18. Bardocci A, Ciucci F, Lofoco G, et al. Pain during second eye cataract surgery under  
48  
49 429 topical anesthesia: an intraindividual study. *Graefes Arch Clin Exp Ophthalmol*  
50  
51 430 2011;**249**:1511-4  
52  
53  
54  
55  
56  
57  
58  
59  
60



## Subjective assessment of the duration of cataract surgery

- 1  
2  
3  
4  
5  
6  
7 431 | 19. Chylack LT, Jr., Wolfe JK, Singer DM, et al. The Lens Opacities Classification System  
8  
9 432 | III. The Longitudinal Study of Cataract Study Group. Arch Ophthalmol  
10  
11 433 | 1993;**111**:831-6  
12  
13 434 | 20. Age-Related Eye Disease Study Research G. The age-related eye disease study  
14  
15 435 | (AREDS) system for classifying cataracts from photographs: AREDS report no. 4.  
16  
17 436 | Am J Ophthalmol 2001;**131**:167-75  
18  
19 437 | 21. Nangia V, Jonas JB, Sinha A, et al. Visual acuity and associated factors. The Central  
20  
21 438 | India Eye and Medical Study. PLoS One 2011;**6**:e22756  
22  
23 439 | 22. Nixon DR. Preoperative cataract grading by Scheimpflug imaging and effect on  
24  
25 440 | operative fluidics and phacoemulsification energy. J Cataract Refract Surg  
26  
27 441 | 2010;**36**:242-6  
28  
29 442 | 23. Wong T, Hingorani M, Lee V. Phacoemulsification time and power requirements in  
30  
31 443 | phaco chop and divide and conquer nucleofractis techniques. J Cataract Refract  
32  
33 444 | Surg 2000;**26**:1374-8  
34  
35 445 | 24. Sanmugasunderam S, Khalfan A. Is fasting required before cataract surgery? A  
36  
37 446 | retrospective review. Can J Ophthalmol 2009;**44**:655-6  
38  
39 447 | 25. Modi N, Shaw S, Allman K, et al. Local anaesthetic cataract surgery: factors  
40  
41 448 | influencing perception of pain, anxiety and overall satisfaction. J Perioper Pract  
42  
43 449 | 2008;**18**:28-33  
44  
45 450 |  
46  
47  
48  
49  
50  
51  
52  
53  
54  
55  
56  
57  
58  
59  
60

Subjective assessment of the duration of cataract surgery

452 **TABLE AND FIGURE LEGENDS**

453

454 **Table 1.** Patient population, preoperative schedule and surgical procedures.

Formatted: Font: Not Bold, Font color: Auto

455 **Table 2.** Univariate analysis of factors associated with surgery duration.

Formatted: Font color: Auto, English (U.K.)

456 **Table 3.** Multivariate analysis of factors associated with surgery duration.

Formatted: Font: Not Bold, Font color: Auto, English (U.K.)

457

Formatted: English (U.K.)

458

Formatted: Font: Bold, English (U.K.)

Formatted: English (U.K.)

459 **Figure 1.** Bland-Altman plot between objective and patient-assessed surgery duration.

Formatted: Font: Not Bold, Font color: Auto

460 The solid line indicates the mean difference (or bias); the blue and red dash lines

461 indicate ~~the limit of agreement of respectively~~ the 95% and 68% limits of agreement

462 respectively confidence interval of the differences.

463 **Figure 2.** Objective surgery duration according to the surgeons' experience. The bar in

Formatted: Font: Not Bold, Font color: Auto

464 the box indicates the median, the cross the mean and the lower and upper hinge the

465 interquartile range. The whisker extends to the most extreme data point which is no

466 more than 1.5 times the interquartile range. Dots represent values outside the fences

467 (outliers). \*Student's t-test

468 **Figure 3.** Objective surgery duration according to the pain-score group. The bar in the

Formatted: Font: Not Bold, Font color: Auto

469 box indicates the median, the cross the mean and the lower and upper hinge the

470 interquartile range. The whisker extends to the most extreme data point which is no

471 more than 1.5 times the interquartile range. Dots represent values outside the fences

472 (outliers). \*Kruskal-Wallis test

1  
2  
3  
4  
5  
6  
7  
8  
9  
10  
11  
12  
13  
14  
15  
16  
17  
18  
19  
20  
21  
22  
23  
24  
25  
26  
27  
28  
29  
30  
31  
32  
33  
34  
35  
36  
37  
38  
39  
40  
41  
42  
43  
44  
45  
46  
47  
48  
49  
50  
51  
52  
53  
54  
55  
56  
57  
58  
59  
60

## Subjective assessment of the duration of cataract surgery

Table 1 Patient population, preoperative schedule and surgical procedures

| Variable                                                    | Value             |
|-------------------------------------------------------------|-------------------|
| Patients (n)                                                | 218               |
| Cataract surgery cases (n)                                  | 283               |
| Age (mean years ( $\pm$ SD))                                | 73.2 ( $\pm$ 9.3) |
| Gender (cases, n (%))                                       |                   |
| Male                                                        | 132 (46.6%)       |
| Female                                                      | 151 (53.4%)       |
| Preoperative visual acuity (Mean LogMAR ( $\pm$ SD))        | 0.4 ( $\pm$ 0.2)  |
| Schedule on the day of surgery (hours)                      |                   |
| Fasting time, mean ( $\pm$ SD)                              | 14 ( $\pm$ 1.8)   |
| Time interval between wake-up and surgery, mean ( $\pm$ SD) | 4.6 ( $\pm$ 1.2)  |
| Waiting time in the department, mean ( $\pm$ SD)            | 2.3 ( $\pm$ 0.7)  |
| Sequence of surgery (cases, n (%))                          |                   |
| First eye                                                   | 155 (54.8%)       |
| Second eye                                                  | 128 (45.2%)       |
| Surgeons' experience (cases, n (%))                         |                   |
| Senior                                                      | 253 (89.4%)       |
| Junior                                                      | 30 (10.6%)        |
| Pain assessment                                             |                   |
| Low pain-score                                              | 205 (72.4%)       |
| High pain-score                                             | 78 (27.6%)        |

473

474

Subjective assessment of the duration of cataract surgery

475  
476

**Table 2** Univariate analyses of factors associated with surgery duration.

| Variable                                  | Objective surgery duration      |          | Patient-assessed surgery duration |          |
|-------------------------------------------|---------------------------------|----------|-----------------------------------|----------|
|                                           | Regression coefficient (95% CI) |          | Regression coefficient (95% CI)   |          |
|                                           | or mean (±SD)                   | P Value* | or mean (±SD)                     | P Value* |
| Age                                       | 0.02 (-0.04-0.86)               | 0.469    | 0.11 (0.03-0.2)                   | 0.011    |
| Gender                                    |                                 |          |                                   |          |
| Male                                      | 14.2 (±5.2)                     | 0.317    | 15.8 (±6.2)                       | 0.184    |
| Female                                    | 13.6 (±4.8)                     |          | 14.8 (±7.4)                       |          |
| Preoperative visual acuity                | 4.23 (1.75-6.72)                | 0.001    | 0 (-3.5-3.5)                      | 1.00     |
| Schedule on the day of surgery            |                                 |          |                                   |          |
| Fasting time                              | 0.27 (-0.04-0.59)               | 0.091    | 0.16 (-0.28-0.60)                 | 0.477    |
| Time interval between wake-up and surgery | 0.49 (0.02-0.95)                | 0.041    | 0.71 (0.07-1.36)                  | 0.03     |
| Waiting time in the department            | 1.15 (0.34-1.96)                | 0.006    | 1.05 (-0.07-2.17)                 | 0.066    |
| Sequence of surgery                       |                                 |          |                                   |          |
| First eye                                 | 14.1 (±5.4)                     | 0.036*   | 15.1 (±6.8)                       | 0.632    |
| Second eye                                | 13.6 (±4.4)                     |          | 15.5 (±7.0)                       |          |
| Surgeons' experience                      |                                 |          |                                   |          |
| Senior                                    | 13.4 (±4.8)                     | <0.0001* | 15.0 (±6.7)                       | 0.032*   |
| Junior                                    | 17.8 (±4.7)                     |          | 17.8 (±7.4)                       |          |
| Pain assessment                           |                                 |          |                                   |          |
| Low pain-score                            | 13.2 (±4.5)                     | 0.001*   | 14.4 (±6.5)                       | <0.001*  |
| High pain-score                           | 15.5 (±5.7)                     |          | 17.6 (±7.3)                       |          |

**Formatted:** Font: Bold, Font color: Auto, English (U.K.)

**Formatted:** Font: Font color: Auto, English (U.K.)

477  
478

\*Linear regression for continuous variables and Students' t-test for categorical variables.

**Formatted:** Font: Not Bold, Font color: Auto

**Formatted:** Font: Not Bold, Font color: Auto

## Subjective assessment of the duration of cataract surgery

479 Table 3. Multivariate analysis of factors associated with surgery duration.

480 Table 3. Multivariate analyses of factors associated with surgery duration.

| Variable                          | Objective surgery duration             |                               |            | Patient-assessed surgery duration      |                               |            |
|-----------------------------------|----------------------------------------|-------------------------------|------------|----------------------------------------|-------------------------------|------------|
|                                   | Adjusted<br>Regression<br>Coefficient* | 95%<br>Confidence<br>Interval | P<br>Value | Adjusted<br>Regression<br>Coefficient* | 95%<br>Confidence<br>Interval | P<br>Value |
| Age                               | -                                      | -                             | -          | 0.1                                    | 0 ; 0.2                       | 0.022      |
| Preoperative visual acuity        | 3.6                                    | 1.2; 5.9                      | 0.002      | -                                      | -                             | -          |
| Waiting time in the<br>department | 0.8                                    | 0.1; 1.6                      | 0.03       | -                                      | -                             | -          |
| Junior vs. senior Surgeon         | 4.1                                    | 2.4; 5.9                      | 0.0001     | 3.3                                    | 0.8; 5.8                      | 0.01       |
| Low vs. high Pain score           | -2.3                                   | -3.5; -1.1                    | 0.0002     | -3.1                                   | -4.8; -1.4                    | 0.0004     |

481 \*Regression coefficients adjusted for variables with p values < 0.10 in the univariate analysis.

482

Formatted: Font color: Auto, English (U.K.)

Formatted: Font: Bold, Font color: Auto, English (U.K.)

Formatted: Font: Font color: Auto, English (U.K.)

Formatted: Font: (Default) Times New Roman, Not Bold, Font color: Auto, English (U.K.)

Formatted: Font: 10 pt, English (U.K.)

Formatted: Hyphenate

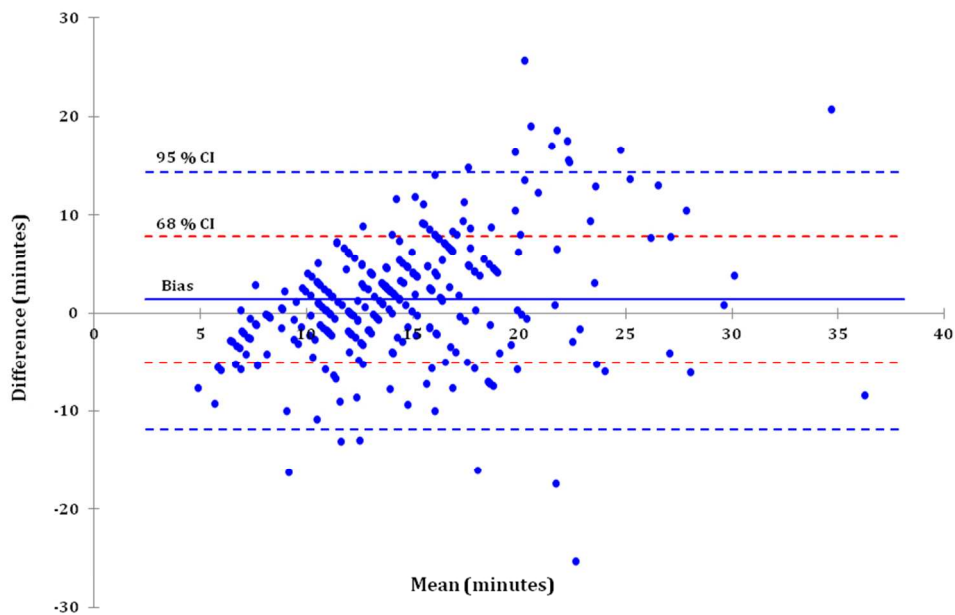

Bland-Altman plot between objective and patient-assessed surgery duration. The solid line indicates the mean difference (or bias); the blue and red dash lines indicate the 95% and 68% limits of agreement respectively.

254x190mm (96 x 96 DPI)

Peer Review Only

1  
2  
3  
4  
5  
6  
7  
8  
9  
10  
11  
12  
13  
14  
15  
16  
17  
18  
19  
20  
21  
22  
23  
24  
25  
26  
27  
28  
29  
30  
31  
32  
33  
34  
35  
36  
37  
38  
39  
40  
41  
42  
43  
44  
45  
46  
47  
48  
49  
50  
51  
52  
53  
54  
55  
56  
57  
58  
59  
60

1  
2  
3  
4  
5  
6  
7  
8  
9  
10  
11  
12  
13  
14  
15  
16  
17  
18  
19  
20  
21  
22  
23  
24  
25  
26  
27  
28  
29  
30  
31  
32  
33  
34  
35  
36  
37  
38  
39  
40  
41  
42  
43  
44  
45  
46  
47  
48  
49  
50  
51  
52  
53  
54  
55  
56  
57  
58  
59  
60

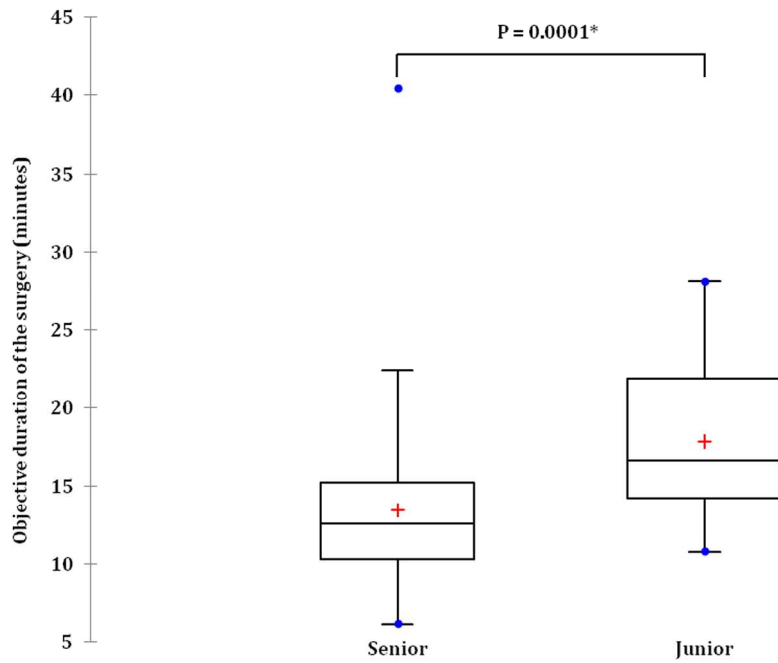

Objective surgery duration according to the surgeons' experience. The bar in the box indicates the median, the cross the mean and the lower and upper hinge the interquartile range. The whisker extends to the most extreme data point which is no more than 1.5 times the interquartile range. Dots represent values outside the fences (outliers). \*Student's t-test

1  
2  
3  
4  
5  
6  
7  
8  
9  
10  
11  
12  
13  
14  
15  
16  
17  
18  
19  
20  
21  
22  
23  
24  
25  
26  
27  
28  
29  
30  
31  
32  
33  
34  
35  
36  
37  
38  
39  
40  
41  
42  
43  
44  
45  
46  
47  
48  
49  
50  
51  
52  
53  
54  
55  
56  
57  
58  
59  
60

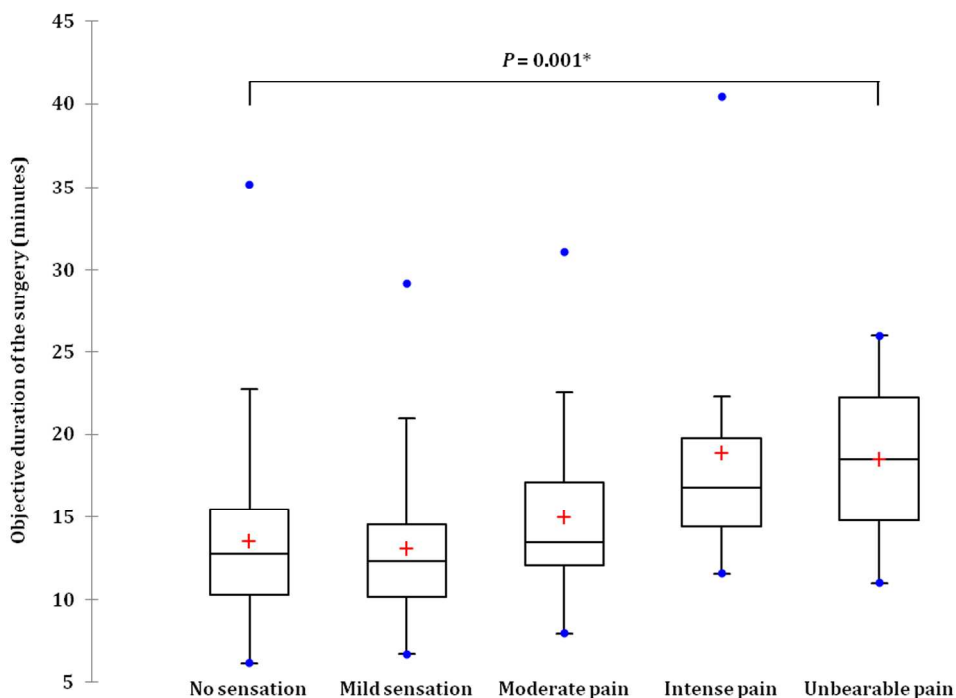

Objective surgery duration according to the pain-score group. The bar in the box indicates the median, the cross the mean and the lower and upper hinge the interquartile range. The whisker extends to the most extreme data point which is no more than 1.5 times the interquartile range. Dots represent values outside the fences (outliers). \*Kruskal-Wallis test

Peer Review Only



STROBE 2007 (v4) Statement—Checklist of items that should be included in reports of cohort studies

| Section/Topic             | Item # | Recommendation                                                                                                                                                                       | Reported on page # |
|---------------------------|--------|--------------------------------------------------------------------------------------------------------------------------------------------------------------------------------------|--------------------|
| Title and abstract        | 1      | (a) Indicate the study’s design with a commonly used term in the title or the abstract                                                                                               | 1 and 3            |
|                           |        | (b) Provide in the abstract an informative and balanced summary of what was done and what was found                                                                                  | 3                  |
| <b>Introduction</b>       |        |                                                                                                                                                                                      |                    |
| Background/rationale      | 2      | Explain the scientific background and rationale for the investigation being reported                                                                                                 | 5                  |
| Objectives                | 3      | State specific objectives, including any prespecified hypotheses                                                                                                                     | 6                  |
| <b>Methods</b>            |        |                                                                                                                                                                                      |                    |
| Study design              | 4      | Present key elements of study design early in the paper                                                                                                                              | 7                  |
| Setting                   | 5      | Describe the setting, locations, and relevant dates, including periods of recruitment, exposure, follow-up, and data collection                                                      | 7                  |
| Participants              | 6      | (a) Give the eligibility criteria, and the sources and methods of selection of participants. Describe methods of follow-up                                                           | 7                  |
|                           |        | (b) For matched studies, give matching criteria and number of exposed and unexposed                                                                                                  | Not applicable     |
| Variables                 | 7      | Clearly define all outcomes, exposures, predictors, potential confounders, and effect modifiers. Give diagnostic criteria, if applicable                                             | 7, 8               |
| Data sources/ measurement | 8*     | For each variable of interest, give sources of data and details of methods of assessment (measurement). Describe comparability of assessment methods if there is more than one group | 7                  |
| Bias                      | 9      | Describe any efforts to address potential sources of bias                                                                                                                            | 7                  |
| Study size                | 10     | Explain how the study size was arrived at                                                                                                                                            | 7                  |
| Quantitative variables    | 11     | Explain how quantitative variables were handled in the analyses. If applicable, describe which groupings were chosen and why                                                         | 8                  |
| Statistical methods       | 12     | (a) Describe all statistical methods, including those used to control for confounding                                                                                                | 8                  |
|                           |        | (b) Describe any methods used to examine subgroups and interactions                                                                                                                  | 8                  |
|                           |        | (c) Explain how missing data were addressed                                                                                                                                          | 8                  |
|                           |        | (d) If applicable, explain how loss to follow-up was addressed                                                                                                                       | NA                 |
|                           |        | (e) Describe any sensitivity analyses                                                                                                                                                | NA                 |
| <b>Results</b>            |        |                                                                                                                                                                                      |                    |

|                          |     |                                                                                                                                                                                                              |          |
|--------------------------|-----|--------------------------------------------------------------------------------------------------------------------------------------------------------------------------------------------------------------|----------|
| Participants             | 13* | (a) Report numbers of individuals at each stage of study—eg numbers potentially eligible, examined for eligibility, confirmed eligible, included in the study, completing follow-up, and analysed            | 10       |
|                          |     | (b) Give reasons for non-participation at each stage                                                                                                                                                         | NA       |
|                          |     | (c) Consider use of a flow diagram                                                                                                                                                                           | NA       |
| Descriptive data         | 14* | (a) Give characteristics of study participants (eg demographic, clinical, social) and information on exposures and potential confounders                                                                     | Table 1  |
|                          |     | (b) Indicate number of participants with missing data for each variable of interest                                                                                                                          | NA       |
|                          |     | (c) Summarise follow-up time (eg, average and total amount)                                                                                                                                                  | NA       |
| Outcome data             | 15* | Report numbers of outcome events or summary measures over time                                                                                                                                               | NA       |
| Main results             | 16  | (a) Give unadjusted estimates and, if applicable, confounder-adjusted estimates and their precision (eg, 95% confidence interval). Make clear which confounders were adjusted for and why they were included | NA       |
|                          |     | (b) Report category boundaries when continuous variables were categorized                                                                                                                                    | NA       |
|                          |     | (c) If relevant, consider translating estimates of relative risk into absolute risk for a meaningful time period                                                                                             | NA       |
| Other analyses           | 17  | Report other analyses done—eg analyses of subgroups and interactions, and sensitivity analyses                                                                                                               | NA       |
| <b>Discussion</b>        |     |                                                                                                                                                                                                              |          |
| Key results              | 18  | Summarise key results with reference to study objectives                                                                                                                                                     | 13       |
| <b>Limitations</b>       |     |                                                                                                                                                                                                              |          |
| Interpretation           | 20  | Give a cautious overall interpretation of results considering objectives, limitations, multiplicity of analyses, results from similar studies, and other relevant evidence                                   | 13.14.15 |
| Generalisability         | 21  | Discuss the generalisability (external validity) of the study results                                                                                                                                        | 15       |
| <b>Other information</b> |     |                                                                                                                                                                                                              |          |
| Funding                  | 22  | Give the source of funding and the role of the funders for the present study and, if applicable, for the original study on which the present article is based                                                | 16       |

\*Give information separately for cases and controls in case-control studies and, if applicable, for exposed and unexposed groups in cohort and cross-sectional studies.

**Note:** An Explanation and Elaboration article discusses each checklist item and gives methodological background and published examples of transparent reporting. The STROBE checklist is best used in conjunction with this article (freely available on the Web sites of PLoS Medicine at <http://www.plosmedicine.org/>, Annals of Internal Medicine at <http://www.annals.org/>, and Epidemiology at <http://www.epidem.com/>). Information on the STROBE Initiative is available at [www.strobe-statement.org](http://www.strobe-statement.org).

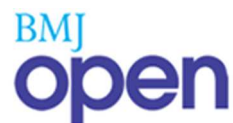

**Patients' subjective assessment of the duration of cataract surgery: A case series**

|                                 |                                                                                                                                                                                                                                                                                                                                                                                                                                                                                                                                                              |
|---------------------------------|--------------------------------------------------------------------------------------------------------------------------------------------------------------------------------------------------------------------------------------------------------------------------------------------------------------------------------------------------------------------------------------------------------------------------------------------------------------------------------------------------------------------------------------------------------------|
| Journal:                        | <i>BMJ Open</i>                                                                                                                                                                                                                                                                                                                                                                                                                                                                                                                                              |
| Manuscript ID:                  | bmjopen-2012-002497.R2                                                                                                                                                                                                                                                                                                                                                                                                                                                                                                                                       |
| Article Type:                   | Research                                                                                                                                                                                                                                                                                                                                                                                                                                                                                                                                                     |
| Date Submitted by the Author:   | 09-Apr-2013                                                                                                                                                                                                                                                                                                                                                                                                                                                                                                                                                  |
| Complete List of Authors:       | Rothschild, Pierre-Raphaël; Hôpital Cochin, Université Paris Descartes, France, Ophtalmologie<br>Grabar, Sophie; Université Paris Descartes, Hôpital Cochin, Service de Biostatistique et Epidémiologie<br>Le Du, Brivael; Hôpital Cochin, Université Paris Descartes, France, Ophtalmologie<br>Temstet, Cyril; Hôpital Cochin, Université Paris Descartes, France, Ophtalmologie<br>Rostaqui, Olga; Hôpital Cochin, Université Paris Descartes, France, Ophtalmologie<br>Brezin, Antoine; Hôpital Cochin, Université Paris Descartes, France, Ophtalmologie |
| <b>Primary Subject Heading</b>: | Ophthalmology                                                                                                                                                                                                                                                                                                                                                                                                                                                                                                                                                |
| Secondary Subject Heading:      | Surgery, Patient-centred medicine, Medical education and training                                                                                                                                                                                                                                                                                                                                                                                                                                                                                            |
| Keywords:                       | Cataract and refractive surgery < OPHTHALMOLOGY, Medical Education, Treatment Surgery                                                                                                                                                                                                                                                                                                                                                                                                                                                                        |
|                                 |                                                                                                                                                                                                                                                                                                                                                                                                                                                                                                                                                              |

SCHOLARONE™  
Manuscripts

Subjective assessment of the duration of cataract surgery

1  
2  
3 **1 Patients' subjective assessment of the duration of cataract surgery:**

4  
5  
6 **2 A case series**

7  
8  
9  
10  
11 Pierre-Raphael Rothschild<sup>1</sup> MD, Sophie Grabar<sup>2</sup> MD, PhD, Brivael Le Dû<sup>1</sup> MD\*, Cyril  
12  
13 Temstet<sup>1</sup> MD\*, Olga Rostaqui<sup>1</sup> MD, Antoine P. Brézin<sup>1</sup> MD, PhD.

14  
15 \* These 2 authors have equally contributed to this work

16  
17  
18 <sup>1</sup> Université Paris Descartes, Hôpital Cochin, Service d'Ophtalmologie, Assistance  
19  
20 Publique Hôpitaux de Paris, 27 rue du faubourg Saint-Jacques, 75014 Paris, France.

21  
22 <sup>2</sup> Université Paris Descartes, Hôpital Cochin, Service de Biostatistique et Epidémiologie,  
23  
24 Assistance Publique Hôpitaux de Paris, 27 rue du faubourg Saint-Jacques, 75014 Paris,  
25  
26  
27 France.

28  
29  
30  
31 **13 Dryad provisional DOI to the submission : doi:10.5061/dryad.27sk4**

32  
33  
34 Keywords: cataract; surgical procedure; time perception; self-assessment

35  
36  
37  
38 Presented in part at the ARVO meeting, Fort Lauderdale, Florida, USA, May 2012

39  
40  
41  
42  
43  
44  
45  
46  
47  
48  
49  
50  
51  
52  
53  
54  
55  
56  
57  
58  
59  
60  
18 Word count: Abstract 299 words; text 2543 words, 25 references, 5 figures and tables

20 Corresponding author and address reprint requests to Antoine P. Brézin, MD, PhD.

21 Université Paris Descartes, Service d'ophtalmologie, Hôpital Cochin, 27 rue du Faubourg  
22 Saint-Jacques, 75014 PARIS France, or at antoine.brezin@cch.aphp.fr

23 Phone: 33 - 1 58412200

24 Fax: 33 - 1 58412210

Subjective assessment of the duration of cataract surgery

1  
2  
3 26 **Article summary**  
4

5 27 **Article focus:**  
6

- 7 28 1. Modern cataract surgery is a safe and quick procedure. Nonetheless it remains a  
8  
9 29 stressful event from the patients' standpoint.  
10  
11 30 2. Several factors have been recognized to participate in patients' preoperative  
12  
13 31 anxiety and targeted preoperative counselling has been shown to be of value.  
14  
15 32 3. Though cataract surgery duration is a frequent patient preoperative qualm it has  
16  
17 33 not been properly studied and patient's perception of time is largely unknown.  
18  
19

20  
21 34 **Key messages:**  
22

- 23 35 1. Patients' perceived cataract surgery duration is reasonably accurate whatever  
24  
25 36 the circumstances.  
26  
27 37 2. Surgeons' experience and pain perception were the two factors independently  
28  
29 38 associated with surgery duration.  
30  
31

32 39 **Strengths and limitations:**  
33

- 34 40 1. The large studied population and the strict definition used for operative time  
35  
36 41 provide reliable measurements of the surgery duration whether objective or  
37  
38 42 patient perceived.  
39  
40 43 2. Anxiety status, chronic illnesses, systemic medications were not part of our  
41  
42 44 standardized study protocol. Moreover all our patients were on sedative  
43  
44 45 medications at the time of surgery. This might have affected patients' perceptions  
45  
46 46 3. The benefit in terms of patient comfort/satisfaction of preoperative information  
47  
48 47 regarding surgery duration needs specific studies beyond the scope of the  
49  
50 48 present report.  
51  
52 49  
53  
54  
55  
56  
57  
58  
59  
60

Subjective assessment of the duration of cataract surgery

1  
2  
3 50 **Abstract**

4  
5 51 **Objectives:** Surgery duration is a source of preoperative anxiety for patients undergoing  
6  
7 52 cataract surgery. To better inform patients we evaluated the agreement between  
8  
9 53 objective and patient perceived surgery duration.

10  
11 54 **Design:** Case series.

12  
13 55 **Setting:** Public teaching university hospital (Paris, France).

14  
15 56 **Participants:** During the study period, 368 cataract surgery cases performed on 285  
16  
17 57 patients were included, 85 cases were excluded from the final analysis. All patients who  
18  
19 58 had uneventful phacoemulsification were included. Cases with any significant  
20  
21 59 intraoperative adverse event or cases requiring additional anaesthesia other than  
22  
23 60 topical were excluded. Resident performed cases were also excluded.

24  
25 61 **Primary and secondary outcomes:** Procedures were timed (objective duration) and  
26  
27 62 patients were asked, immediately afterwards, to assess the duration of their surgery  
28  
29 63 (patient-assessed duration). The agreement between objective and patient-assessed  
30  
31 64 duration as well as influencing factors was studied.

32  
33 65 **Results:** Mean objective duration ( $13.9 \pm 5$  minutes) and patient-assessed duration  
34  
35 66 ( $15.3 \pm 6.9$  minutes) were significantly correlated (Spearman's  $r = 0.452$ ,  $P < .0001$ ).  
36  
37 67 Furthermore, Bland-Altman analysis and the intraclass correlation coefficient (0.341,  
38  
39 68 95% CI, 0.23-0.44) were quite in agreement. On univariate analysis senior-performed  
40  
41 69 procedures were significantly shorter than those performed by juniors (13.4 versus 17.8  
42  
43 70 minutes,  $P = .0001$ ). Pain was recorded as "no sensation" (31.5 % of the cases), "mild  
44  
45 71 sensation" (41 %), "moderate pain" (23.3 %), "intense pain" (3.5 %) and "unbearable  
46  
47 72 pain" (0.7 %). Groups with high pain-score had significantly longer procedures ( $P$   
48  
49 73  $< .001$ ). Multivariate analysis revealed that the only independent factors associated with  
50  
51  
52  
53  
54  
55  
56  
57  
58  
59  
60

Subjective assessment of the duration of cataract surgery

1  
2  
3 74 both the objective and patient-assessed duration of surgery was surgeon's experience  
4  
5 75 and pain-score.  
6

7 76 **Conclusions:** In our study, patients' estimated and real duration of the surgery showed  
8  
9  
10 77 moderate agreement, suggesting that emotions associated with eye surgery under  
11  
12 78 topical anaesthesia did not dramatically hinder patients' perception of time. However,  
13  
14 79 the benefit of preoperative counselling regarding the duration of surgery will need  
15  
16 80 further evaluation  
17  
18  
19  
20  
21  
22  
23  
24  
25  
26  
27  
28  
29  
30  
31  
32  
33  
34  
35  
36  
37  
38  
39  
40  
41  
42  
43  
44  
45  
46  
47  
48  
49  
50  
51  
52  
53  
54  
55  
56  
57  
58  
59  
60

Subjective assessment of the duration of cataract surgery

1  
2  
3  
4  
5  
6  
7  
8  
9  
10  
11  
12  
13  
14  
15  
16  
17  
18  
19  
20  
21  
22  
23  
24  
25  
26  
27  
28  
29  
30  
31  
32  
33  
34  
35  
36  
37  
38  
39  
40  
41  
42  
43  
44  
45  
46  
47  
48  
49  
50  
51  
52  
53  
54  
55  
56  
57  
58  
59  
60

81 **INTRODUCTION**

82

83 The shortened duration of cataract surgery is one of the striking features owing to the  
84 improvement of surgical techniques. Live surgery events and real-time surgical video  
85 recordings by elite surgeons nowadays seldom show procedures lasting more than 10  
86 minutes. The quickness of modern cataract surgery by phacoemulsification has made  
87 topical anaesthesia, whose effects wear off faster than previously used peribulbar  
88 injections, the method of choice for analgesia.[1] Nevertheless, whatever the amount of  
89 trust patients put in their surgeon, many remain apprehensive of eye surgery under full  
90 consciousness or with minimal sedation by systemic administration of drugs. This  
91 apprehension is often focused on the fear of involuntary eye movements during the  
92 procedure, which may complicate the surgeon's task, on patients' fear of seeing their eye  
93 surgery or on the fear of painful sensations. In reply, quite abundant data are now  
94 available stemming from several studies focused on the impressions of patients during  
95 the procedures.[2 3] Various methods to assess the perception of pain have been used  
96 and have validated that cataract surgery under topical anaesthesia is by and large  
97 usually a painless procedure.[4] Visual sensations experienced by patients under the  
98 operating microscope have also been recorded and have mostly been found to be of no  
99 concern.[5 6] In addition to these topics, patients prior to their surgery have frequent  
100 qualms regarding the duration of the procedure and hence regarding their ability to  
101 withstand their eye surgery under topical anaesthesia.[7] Providing additional targeted  
102 information to patients undergoing cataract surgery has been shown to improve their  
103 satisfaction.[8]

104 This information could include data regarding the duration of the procedure. However,  
105 surprisingly, in contrast to the common nature of cataract surgery by modern



Subjective assessment of the duration of cataract surgery

1  
2  
3 106 phacoemulsification, there is scarce data regarding its duration. The purpose of this  
4  
5 107 study was therefore to compare the objective duration of cataract surgery with the  
6  
7 108 patients' subjective assessment of this duration.  
8  
9

10  
11  
12  
13  
14  
15  
16  
17  
18  
19  
20  
21  
22  
23  
24  
25  
26  
27  
28  
29  
30  
31  
32  
33  
34  
35  
36  
37  
38  
39  
40  
41  
42  
43  
44  
45  
46  
47  
48  
49  
50  
51  
52  
53  
54  
55  
56  
57  
58  
59  
60

For peer review only

Subjective assessment of the duration of cataract surgery

1  
2  
3 110 **METHODS**  
4  
5  
6 111  
7 112 The study was set in the department of ophthalmology of Hôpital Cochin, a teaching  
8  
9 113 university hospital located in Paris, France. Data were collected prospectively in  
10  
11 114 consecutive patients operated between May 17, 2011 and July 22, 2011 and was  
12  
13 115 approved by the Institutional Review Board.  
14

15 All patients who had uneventful phacoemulsification under topical anaesthesia  
16  
17 with placement of an intraocular lens in the capsular bag were included. Cases with any  
18  
19 “significant adverse event” defined either by a major intraoperative complication such  
20  
21 as vitreous loss or by a technical problem such as phacoemulsifier malfunction that  
22  
23 prolonged the procedure by 10 minutes or more were excluded. Similarly, patients who  
24  
25 required any anaesthesia in addition to topical lidocaine 2% gel, or those who required  
26  
27 sedation in addition to the preoperatively given hydroxyzine were excluded from the  
28  
29 analyses. Teaching cases involving resident participation were also excluded from the  
30  
31 analyses. The duration of the procedure, referred throughout the text as the objective  
32  
33 duration, was timed by operating room nurses as the exposure of the patients’ eye to the  
34  
35 light of the operating microscope, from the beginning until the end of the surgery.  
36  
37  
38  
39

40 The objective duration of surgery was compared to its subjective assessment  
41  
42 obtained by questioning patients immediately after drape removal and referred  
43  
44 throughout the text as the patient-assessed duration. If the initial patients’ replies were  
45  
46 imprecise, a second line of questioning was used requesting patients to assess the  
47  
48 duration of their surgery by the minute. To avoid assessment biases, patients were not  
49  
50 warned before the surgery that they would be asked to assess the duration of their  
51  
52 procedure.  
53  
54  
55  
56  
57  
58  
59  
60

## Subjective assessment of the duration of cataract surgery

1  
2  
3 134 The patients' perception of pain during surgery was also assessed with a  
4  
5 135 standard numeric scale, graded from 0 to 4: 0 (no pain), 1 (mild sensation), 2 (moderate  
6  
7 136 pain), 3 (intense pain), 4 (unbearable pain) as previously used in other studies.[4 9 10]  
8

9  
10 137 Other factors were also recorded: age, gender, first or second eye surgery, and  
11  
12 138 best corrected preoperative visual acuity. All surgeries were performed between 8:00  
13  
14 139 AM and 2:00 PM and the patients were requested to fast from midnight on the night  
15  
16 140 prior to their surgery. The patients' preoperative schedules were recorded: duration of  
17  
18 141 fasting, time interval between wake-up and surgery, time interval between entry in the  
19  
20 142 department suite and surgery (waiting time in the department). All patients received 0.5  
21  
22 143 mg/kg of hydroxyzine at their time of arrival in our department used as sedative and  
23  
24 144 additive sedation during the surgery when necessary. No other drug was given  
25  
26 145 preoperatively, including non-steroidal anti-inflammatory drugs. The need for  
27  
28 146 additional anaesthetic techniques was recorded.  
29  
30

31  
32 147 Surgeons were categorized as seniors when they had the experience of more than  
33  
34 148 1000 procedures performed prior to the study or as juniors otherwise.  
35  
36

37 149

38  
39 **Statistical analysis**

40 151 Categorical variables are expressed as numbers (percentages) and comparisons were  
41  
42 152 conducted using the Fisher-exact test. For continuous variables, mean  $\pm$  standard  
43  
44 153 deviation (SD) or median (interquartile range, IQR) are provided, and comparisons were  
45  
46 154 conducted using the Kruskal-Wallis test or the student's t-test.  
47  
48

49 155 To evaluate the agreement between objective and patient-assessed duration, a Bland-  
50  
51 156 Altman plot was used.[11] The differences between the two methods (i.e. objective and  
52  
53 157 patient-assessed duration) are plotted against their mean. The Bland-Altman analysis  
54  
55 158 provides the mean difference (also called bias) as well as the 95% or the 68% limits of  
56  
57  
58  
59  
60

Subjective assessment of the duration of cataract surgery

1  
2  
3 159 agreement corresponding respectively to the mean difference  $\pm 2$  SD or  $\pm 1$  SD. When  
4  
5 160 agreement between the two methods is good, most of the differences should reside  
6  
7 161 within the agreement limit interval. We also computed the Intraclass correlation  
8  
9 162 coefficient to quantitatively evaluate the agreement.  
10  
11 163 Correlation tests were conducted using the Spearman's correlation coefficient ( $r$ ).  
12  
13 164 Factors with  $P$  values  $<.10$  in the univariate analysis were included in a multivariate  
14  
15 165 linear regression and ANCOVA model to determine the independent factors associated  
16  
17 166 with either objective or patient-assessed surgery duration.  $P$  Values  $<0.05$  were  
18  
19 167 considered significant. All analyses were performed with XLSTAT 2012.2.02 software  
20  
21 168 (Addinsoft, Paris, France).  
22  
23  
24  
25  
26  
27  
28  
29  
30  
31  
32  
33  
34  
35  
36  
37  
38  
39  
40  
41  
42  
43  
44  
45  
46  
47  
48  
49  
50  
51  
52  
53  
54  
55  
56  
57  
58  
59  
60

169

Subjective assessment of the duration of cataract surgery

1  
2  
3 170 **RESULTS**

4 171  
5 172 A total of 283 cases performed in 218 patients were analyzed after exclusion of 85 cases  
6  
7 173 (65 patients) which met one or more exclusion criteria as detailed herein. Resident  
8  
9  
10 174 participation was the most frequent motive for exclusion (70 cases). Other causes were  
11  
12 175 significant intraoperative adverse events including posterior capsular break or zonular  
13  
14 176 disinsertion (8 cases) and phacoemulsifier breakdown (1 case). Four out the 8 cases  
15  
16 177 presenting intraoperative vitreous loss had an identifiable risk factor for this  
17  
18 178 complication: two were traumatic cataracts and two were cataracts related to severe  
19  
20  
21 179 pseudoexfoliation syndrome. Thirteen cases required additional anaesthesia or sedation  
22  
23 180 including sub-Tenon's block (5 cases), sub-conjunctival injection (1 case), intracameral  
24  
25 181 injection of lidocaine (1 case) and/or midazolam intravenous sedation (6 cases).  
26  
27  
28 182 Characteristics of the study population, patients' schedule on the day of surgery,  
29  
30 183 sequence of procedures, phacoemulsifiers used and surgery duration are shown in table  
31  
32 184 1. No sensation was reported in 106 (31.5 %) cases, a mild sensation in 147 (41 %)  
33  
34 185 cases, moderate pain in 90 (23.3 %) cases, intense pain in 14 (3.5 %) cases and  
35  
36 186 unbearable pain in 2 (0.7 %) cases. The perception of pain did not significantly differ  
37  
38 187 between first and second eye procedures. Out of 155 patients operated in their first eye  
39  
40 188 113 patients (73%), reported low pain [no or mild sensation (score 0 or 1)], while 92 of  
41  
42 189 128 patients (72%) operated on their second eye rated their sensations similarly  
43  
44 190 (p=0.9).

45  
46  
47  
48 191 **Comparison between objective and patient-assessed duration**

49  
50 192 The mean objective surgery duration was 13.9 ( $\pm$  5) minutes and the mean patient-  
51  
52 193 assessed duration was 15.3 ( $\pm$  6.9) minutes. Bland-Altman plot showed a fair agreement  
53  
54 194 between the objective and patient-assessed duration (fig 1). Mean difference (or bias)  
55  
56 195 was only 1.4 minute (95% CI, 0.63-2.15 minute). However an agreement worsening was  
57  
58  
59  
60

Subjective assessment of the duration of cataract surgery

1  
2  
3 196 noted for longer procedures but error was equally distributed over and under the limits  
4  
5 197 of agreement (-11.3-14.1 minutes). Intraclass correlation coefficient was 0.341 (95% CI,  
6  
7 198 0.23-0.44) suggesting moderate agreement between the objective and patient-assessed  
8  
9 199 duration.

10  
11 200 A significant correlation between the objective and patient-assessed duration of the  
12  
13 201 surgery was observed (Spearman's  $r = 0.452$ ,  $P < .0001$ ).

### 202 **Factors associated with objective surgery duration**

18  
19 203 On univariate analysis, objective surgery duration was significantly correlated to  
20  
21 204 preoperative VA ( $p=0.001$ ), time interval between wake-up and surgery ( $p=0.041$ ), and  
22  
23 205 to the waiting time in the department ( $p=0.006$ ). The corresponding regression  
24  
25 206 coefficients and 95 % CI are provided in table 2. Similarly, objective duration was  
26  
27 207 significantly different according to surgeon experience with shorter procedures for  
28  
29 208 seniors ( $13.4 \pm 4.8$  minutes) compared to juniors ( $17.8 \pm 4.7$ )(fig 2). Objective duration  
30  
31 209 was significantly different according to pain-score group with significantly longer  
32  
33 210 procedures in groups with high pain-scores (score 4, 3 and 2) compared to groups with  
34  
35 211 low pain scores (score 0 or 1) with mean surgery durations of 15.5 ( $\pm 5.7$ ) and 13.2  
36  
37 212 ( $\pm 4.5$ ) respectively (fig 3). Objective duration was significantly different between first  
38  
39 213 and second eye procedures but not according to gender (table 2).

40  
41  
42  
43 214 Multivariate analysis revealed patient preoperative visual acuity, waiting time in  
44  
45 215 the department, surgeon experience and pain-score group to be independent factors  
46  
47 216 associated with objective surgery duration (table 3).

### 217 **Factors associated with patient-assessed surgery duration**

48  
49  
50  
51 218 On univariate analysis, patient-assessed surgery duration was correlated to patient age  
52  
53 219 ( $p=0.011$ ), and time interval between wake-up and surgery ( $p=0.03$ ). The corresponding  
54  
55 220 regression coefficients and 95% CI are provided in table 2. Similarly, patient-assessed  
56  
57  
58  
59  
60

Subjective assessment of the duration of cataract surgery

1  
2  
3 221 duration was also significantly different according to surgeon experience ( $p=0.032$ ) and  
4  
5 222 according to pain-score group ( $p=0.001$ ). Conversely, patient-assessed duration was not  
6  
7 223 significantly different between first and second eye procedures or according to gender.  
8

9  
10 224 Multivariate analysis revealed patient age, surgeon experience and pain-score  
11  
12 225 group to be independent factors associated with patient-assessed surgery duration  
13  
14 226 (table 3).  
15

16  
17 227  
18  
19  
20  
21  
22  
23  
24  
25  
26  
27  
28  
29  
30  
31  
32  
33  
34  
35  
36  
37  
38  
39  
40  
41  
42  
43  
44  
45  
46  
47  
48  
49  
50  
51  
52  
53  
54  
55  
56  
57  
58  
59  
60

For peer review only

Subjective assessment of the duration of cataract surgery

1  
2  
3 228 **DISCUSSION**

4 229  
5 230 Our study showed that patients overall fairly estimated the duration of their surgery and  
6  
7 231 that the two independent factors associated with both the objective and subjective  
8  
9  
10 232 surgery duration were surgeon's experience and pain-score.

11 233 The objective duration of cataract surgery by modern phacoemulsification has  
12  
13  
14 234 not been the main outcome measure of previous studies, but has occasionally been  
15  
16 235 assessed mainly in analyzes of the effects of teaching or as a secondary outcome. [12 13]  
17  
18 236 When reported, the duration of surgery ranged from an average of 30 minutes in studies  
19  
20  
21 237 published in 2003 to 15-19 minutes in more recent reports.[14-17]. Our objective  
22  
23 238 measure of procedures lasting 13 minutes is in line with this shortening that most  
24  
25 239 probably stems from improvements in the technique of cataract surgery, including  
26  
27  
28 240 suture less clear corneal micro incisions. As shown previously, our data confirmed that  
29  
30 241 experienced surgeons are quicker than more junior ophthalmologists.[12 13] In our  
31  
32 242 study, the surgeon's experience factor was independently associated with both the  
33  
34  
35 243 objective and subjective surgery duration.

36  
37 244 The subjective perception of time by patients undergoing cataract surgery under  
38  
39 245 topical anaesthesia has never been studied either. Preparations for surgery include the  
40  
41 246 testing of phacoemulsifiers, applying topical anaesthesia, preoperative disinfection of  
42  
43 247 the eye by povidone-iodine, draping and placement of a lid speculum. These steps may  
44  
45  
46 248 take as long as the surgical procedure itself or even in some instances may take longer  
47  
48 249 than the surgery. From the patients' perspective distinguishing these preoperative  
49  
50 250 stages from their surgery per se may be difficult. To minimize this bias when seeking our  
51  
52  
53 251 patients' subjective assessment of the duration of their surgery, we specifically asked for  
54  
55 252 their impression of the elapsed time between the illumination of their eye under the  
56  
57  
58 253 operating microscope until the removal of the drapes. However, this time interval both  
59  
60



## Subjective assessment of the duration of cataract surgery

1  
2  
3 254 subjectively assessed and clocked by nurses may have added approximately 1 or 2 extra  
4  
5 255 minutes to the real time of the surgery, as the surgeons adjusted the focus of the  
6  
7 256 microscope and made their final preparations for the procedure.  
8

9  
10 257 The assessment of pain was a secondary outcome measure in our study and we  
11  
12 258 used the simple 5-step scale as validated in other studies.[4 9 10] A lack of sensation or a  
13  
14 259 mild sensation were reported in 72.4% of cases, moderate pain in 23.3% cases and  
15  
16 260 intense or even unbearable pain in 4.3% of cases. These percentages are comparable to  
17  
18 261 previous reports using the same 5-step pain-score scale.[9] Unsurprisingly, the  
19  
20 262 perception of pain was correlated with the duration of procedures. In our study, the  
21  
22 263 pain-score group was independently associated with both the objective and subjective  
23  
24 264 surgery duration. In a previous study patients tended to report their second eye surgery  
25  
26 265 as more painful than their first eye surgery and this finding was related to a decreased  
27  
28 266 preoperative anxiety at the time of the second procedure.[16] However, this finding was  
29  
30 267 not observed in our study, nor in another recent report.[18] This discrepancy could be  
31  
32 268 due to the preoperative sedation given to all our patients. Such medications can alter the  
33  
34 269 perception of pain as well as the perception of duration and also aim at reducing anxiety.  
35  
36 270 Similarly, we did not account for the patients' systemic medications or illnesses, if any,  
37  
38 271 which could also have altered their judgment and their pain thresholds.  
39  
40  
41  
42

43 272 Preoperative standardized grading of cataracts or pupil size was not recorded in  
44  
45 273 our study. Patient age may however be used as a surrogate parameter influencing the  
46  
47 274 grade of the cataract.[19 20] In nuclear cataracts preoperative visual acuity may also be  
48  
49 275 correlated to its grade.[21] Our data confirmed that the objective duration of surgery  
50  
51 276 was longer in cases with worse preoperative visual acuity, as more advanced cataracts  
52  
53 277 require a longer duration of ultrasonic power release.[22] Surprisingly, the age of the  
54  
55 278 patient was not correlated with objective surgery duration but with patient-assessed  
56  
57  
58  
59  
60

Subjective assessment of the duration of cataract surgery

1  
2  
3 279 surgery duration, though weakly. The chop technique may result in quicker procedures,  
4  
5 280 however the evaluation of the effect of surgical techniques on the duration of surgery  
6  
7 281 was not within the scope of our study.[23]  
8

9  
10 282 Most patients quite correctly assessed the duration of their surgery, though the  
11  
12 283 correlation with objective surgery duration was only moderate and samples were large.  
13  
14 284 Hence, we were not able to identify specific characteristics significantly associated with  
15  
16 285 an underestimation or an overestimation of time. Although evidence suggests that  
17  
18 286 fasting prior to cataract surgery under topical anaesthesia can be abandoned, in this  
19  
20 287 series patients fasted from midnight on the day prior to their surgery.[24] As our  
21  
22 288 patients were operated from 8:00 AM to 2:00 PM, fasting time varied from one case to  
23  
24 289 another, but these variations did not influence the subjective assessment of the duration  
25  
26 290 of surgery. Similarly, we thought that an early arrival and a subsequent long waiting in  
27  
28 291 the department of ophthalmology prior to entry in the operating room could be a factor  
29  
30 292 of stress resulting in an over-assessment of the duration of their surgery by patients. Yet  
31  
32 293 our analysis did not reveal that this factor played any role. We unexpectedly observed  
33  
34 294 that the time interval between wakeup and surgery, as well as waiting time in the  
35  
36 295 department, were associated with longer procedures. This might have been linked to  
37  
38 296 surgeons slowing down after a number of cases. Although it has been suggested that  
39  
40 297 handholding may reduce anxiety and the perception of pain during cataract surgery, this  
41  
42 298 was not applied in our practice.[25]  
43  
44  
45  
46  
47

48 299 Our study showed that patients overall fairly estimated the duration of their  
49  
50 300 surgery. The trend in the past decades has been towards a constant reduction of the  
51  
52 301 duration of procedures in eye surgery. As new technical improvements are under way,  
53  
54 302 such as femtosecond laser-assisted cataract surgery, the fact that patients are rather  
55  
56 303 acutely aware of the duration of procedures must be taken into consideration as an  
57  
58  
59  
60

Subjective assessment of the duration of cataract surgery

1  
2  
3 304 important parameter for their comfort. . However, proving the benefit of preoperative  
4  
5 305 counselling in terms of patient satisfaction would require a specific study beyond the  
6  
7 306 scope of this report  
8  
9  
10 307  
11  
12  
13  
14  
15  
16  
17  
18  
19  
20  
21  
22  
23  
24  
25  
26  
27  
28  
29  
30  
31  
32  
33  
34  
35  
36  
37  
38  
39  
40  
41  
42  
43  
44  
45  
46  
47  
48  
49  
50  
51  
52  
53  
54  
55  
56  
57  
58  
59  
60

For peer review only

1 Subjective assessment of the duration of cataract surgery

2  
3 308 **Acknowledgments**

4  
5 309 Jean-Baptiste Daudin, MD and Dominique Monnet MD, PhD provided and cared for study  
6  
7 310 patients.

8  
9  
10 311 **Funding**

11 312 The study was supported by the Association d'Ophtalmologie de Cochin, Paris, France

12  
13 313 **Competing interests**

14 314 The authors have no conflict of interest related to results presented in this study.

15 315

16  
17  
18 316 **Contributorship Statement**

19 317 Only the below listed authors qualify for authorship according to the ICMJE criteria:

20 318 Pierre-Raphael Rothschild substantially participated in the following:

- 21 319 1) Conception and design, acquisition of data, and analysis and interpretation of data  
22 320 2) Drafting the article and revising it critically for important intellectual content  
23 321 3) Final approval of the version to be published

24 322 Sophie Grabar substantially participated in the following:

- 25 323 1) Conception and design, and analysis and interpretation of data  
26 324 2) Drafting the article and revising it critically for important intellectual content  
27 325 3) Final approval of the version to be published

28 326

29 327 Brivael Le Dû substantially participated in the following:

- 30 328 1) Conception and design, acquisition of data, and analysis and interpretation of data  
31 329 2) Drafting the article and revising it critically for important intellectual content  
32 330 3) Final approval of the version to be published

33 331

34 332 Cyril Temstet substantially participated in the following:

1  
2  
3  
4  
5  
6  
7  
8  
9  
10  
11  
12  
13  
14  
15  
16  
17  
18  
19  
20  
21  
22  
23  
24  
25  
26  
27  
28  
29  
30  
31  
32  
33  
34  
35  
36  
37  
38  
39  
40  
41  
42  
43  
44  
45  
46  
47  
48  
49  
50  
51  
52  
53  
54  
55  
56  
57  
58  
59  
60

Subjective assessment of the duration of cataract surgery

333 1) Conception and design, acquisition of data, and analysis and interpretation of data

334 2) Drafting the article and revising it critically for important intellectual content

335 3) Final approval of the version to be published

336

337 Olga Rostaqui substantially participated in the following:

338 1) Conception and design, acquisition of data

339 2) Drafting the article and revising it critically for important intellectual content

340 3) Final approval of the version to be published

341

342 Antoine P. Brézin substantially participated in the following:

343 1) Conception and design, acquisition of data, and analysis and interpretation of data

344 2) Drafting the article and revising it critically for important intellectual content

345 3) Final approval of the version to be published

346 **Data sharing:**

347 Extra data can be accessed via the Dryad data repository at <http://datadryad.org/> with the  
348 doi:10.5061/dryad.27sk4

Subjective assessment of the duration of cataract surgery

1  
2  
3 349 **REFERENCES**

4 350

5 351 1. Leaming DV. Practice styles and preferences of ASCRS members--2003 survey. J

6  
7 352 Cataract Refract Surg 2004;**30**:892-900

8  
9  
10 353 2. Fagerstrom R. Fear of a cataract operation in aged persons. Psychol Rep

11 354 1993;**72**:1339-46

12  
13  
14 355 3. Nijkamp MD, Kenens CA, Dijker AJ, et al. Determinants of surgery related anxiety in

15 356 cataract patients. Br J Ophthalmol 2004;**88**:1310-4

16  
17 357 4. Davison M, Padroni S, Bunce C, et al. Sub-Tenon's anaesthesia versus topical

18 358 anaesthesia for cataract surgery. Cochrane Database Syst Rev 2007(3):CD006291

19  
20  
21 359 5. Newman DK. Visual experience during phacoemulsification cataract surgery under

22 360 topical anaesthesia. Br J Ophthalmol 2000;**84**:13-5

23  
24  
25 361 6. Yaylali V, Yildirim C, Tatlipinar S, et al. Subjective visual experience and pain level

26 362 during phacoemulsification and intraocular lens implantation under topical

27 363 anesthesia. Ophthalmologica 2003;**217**:413-6

28  
29  
30 364 7. Nijkamp MD, Ruitter RA, Roeling M, et al. Factors related to fear in patients undergoing

31 365 cataract surgery: a qualitative study focusing on factors associated with fear and

32 366 reassurance among patients who need to undergo cataract surgery. Patient Educ

33 367 Couns 2002;**47**:265-72

34  
35  
36 368 8. Haripriya A, Tan CS, Venkatesh R, et al. Effect of preoperative counseling on fear from

37 369 visual sensations during phacoemulsification under topical anesthesia. J Cataract

38 370 Refract Surg 2011;**37**:814-8

39  
40  
41 371 9. Vielpeau I, Billotte C, Kreidie J, et al. [Comparative study between topical anesthesia

42 372 and sub-Tenon's capsule anesthesia for cataract surgery]. J Fr Ophtalmol

43  
44  
45 373 1999;**22**:48-51

## Subjective assessment of the duration of cataract surgery

- 1  
2  
3 374 10. Roman S, Auclin F, Ullern M. Topical versus peribulbar anesthesia in cataract  
4  
5 375 surgery. *J Cataract Refract Surg* 1996;**22**:1121-4  
6  
7 376 11. Bland JM, Altman DG. Statistical methods for assessing agreement between two  
8  
9 377 methods of clinical measurement. *Lancet* 1986;**1**:307-10  
10  
11 378 12. Hosler MR, Scott IU, Kunselman AR, et al. Impact of resident participation in cataract  
12  
13 379 surgery on operative time and cost. *Ophthalmology* 2012;**119**:95-8  
14  
15 380 13. Wiggins MN, Warner DB. Resident physician operative times during cataract surgery.  
16  
17 381 *Ophthalmic Surg Lasers Imaging* 2010;**41**:518-22  
18  
19 382 14. Tranos PG, Wickremasinghe SS, Sinclair N, et al. Visual perception during  
20  
21 383 phacoemulsification cataract surgery under topical and regional anaesthesia.  
22  
23 384 *Acta Ophthalmol Scand* 2003;**81**:118-22  
24  
25 385 15. Wickremasinghe SS, Tranos PG, Sinclair N, et al. Visual perception during  
26  
27 386 phacoemulsification cataract surgery under subtenons anaesthesia. *Eye (Lond)*  
28  
29 387 2003;**17**:501-5  
30  
31 388 16. Ursea R, Feng MT, Zhou M, et al. Pain perception in sequential cataract surgery:  
32  
33 389 comparison of first and second procedures. *J Cataract Refract Surg*  
34  
35 390 2011;**37**:1009-14  
36  
37 391 17. Ang CL, Au Eong KG, Lee SS, et al. Patients' expectation and experience of visual  
38  
39 392 sensations during phacoemulsification under topical anaesthesia. *Eye (Lond)*  
40  
41 393 2007;**21**:1162-7  
42  
43 394 18. Bardocci A, Ciucci F, Lofoco G, et al. Pain during second eye cataract surgery under  
44  
45 395 topical anesthesia: an intraindividual study. *Graefes Arch Clin Exp Ophthalmol*  
46  
47 396 2011;**249**:1511-4  
48  
49  
50  
51  
52  
53  
54  
55  
56  
57  
58  
59  
60

## Subjective assessment of the duration of cataract surgery

- 1  
2  
3 397 19. Chylack LT, Jr., Wolfe JK, Singer DM, et al. The Lens Opacities Classification System  
4  
5 398 III. The Longitudinal Study of Cataract Study Group. Arch Ophthalmol  
6  
7 399 1993;**111**:831-6  
8  
9  
10 400 20. Age-Related Eye Disease Study Research G. The age-related eye disease study  
11  
12 401 (AREDS) system for classifying cataracts from photographs: AREDS report no. 4.  
13  
14 402 Am J Ophthalmol 2001;**131**:167-75  
15  
16  
17 403 21. Nangia V, Jonas JB, Sinha A, et al. Visual acuity and associated factors. The Central  
18  
19 404 India Eye and Medical Study. PLoS One 2011;**6**:e22756  
20  
21 405 22. Nixon DR. Preoperative cataract grading by Scheimpflug imaging and effect on  
22  
23 406 operative fluidics and phacoemulsification energy. J Cataract Refract Surg  
24  
25 407 2010;**36**:242-6  
26  
27  
28 408 23. Wong T, Hingorani M, Lee V. Phacoemulsification time and power requirements in  
29  
30 409 phaco chop and divide and conquer nucleofractis techniques. J Cataract Refract  
31  
32 410 Surg 2000;**26**:1374-8  
33  
34  
35 411 24. Sanmugasunderam S, Khalfan A. Is fasting required before cataract surgery? A  
36  
37 412 retrospective review. Can J Ophthalmol 2009;**44**:655-6  
38  
39 413 25. Modi N, Shaw S, Allman K, et al. Local anaesthetic cataract surgery: factors  
40  
41 414 influencing perception of pain, anxiety and overall satisfaction. J Perioper Pract  
42  
43 415 2008;**18**:28-33  
44  
45  
46 416  
47 417



Subjective assessment of the duration of cataract surgery

1  
2  
3 418 **TABLE AND FIGURE LEGENDS**  
4  
5  
6

7 419

8 **Table 1.** Patient population, preoperative schedule and surgical procedures.  
9

10 **Table 2** Univariate analyses of factors associated with surgery duration.  
11

12 **Table 3** Multivariate analyses of factors associated with surgery duration.  
13  
14  
15

16

17  
18  
19

20 **Figure 1.** Bland-Altman plot between objective and patient-assessed surgery duration.  
21

22 The solid line indicates the mean difference (or bias); the blue and red dash lines  
23

24 indicate the 95% and 68% limits of agreement respectively.  
25

26 **Figure 2.** Objective surgery duration according to the surgeons' experience. The bar in  
27

28 the box indicates the median, the cross the mean and the lower and upper hinge the  
29

30 interquartile range. The whisker extends to the most extreme data point which is no  
31

32 more than 1.5 times the interquartile range. Dots represent values outside the fences  
33

34 (outliers). \*Student's t-test  
35

36 **Figure 3.** Objective surgery duration according to the pain-score group. The bar in the  
37

38 box indicates the median, the cross the mean and the lower and upper hinge the  
39

40 interquartile range. The whisker extends to the most extreme data point which is no  
41

42 more than 1.5 times the interquartile range. Dots represent values outside the fences  
43

44 (outliers). \*Kruskal-Wallis test  
45  
46  
47  
48  
49  
50  
51  
52  
53  
54  
55  
56  
57  
58  
59  
60

Subjective assessment of the duration of cataract surgery

**Table 1 Patient population, preoperative schedule and surgical procedures**

| Variable                                                              | Value                              |
|-----------------------------------------------------------------------|------------------------------------|
| <b>Patients (n)</b>                                                   | <b>218</b>                         |
| <b>Cataract surgery cases (n)</b>                                     | <b>283</b>                         |
| <b>Age (mean years (<math>\pm</math> SD))</b>                         | <b>73.2 (<math>\pm</math> 9.3)</b> |
| <b>Gender (cases, n (%))</b>                                          |                                    |
| Male                                                                  | 132 (46.6%)                        |
| Female                                                                | 151 (53.4%)                        |
| <b>Preoperative visual acuity (Mean LogMAR (<math>\pm</math> SD))</b> | <b>0.4 (<math>\pm</math>0.2)</b>   |
| <b>Schedule on the day of surgery (hours)</b>                         |                                    |
| Fasting time, mean ( $\pm$ SD)                                        | 14 ( $\pm$ 1.8)                    |
| Time interval between wake-up and surgery, mean ( $\pm$ SD)           | 4.6 ( $\pm$ 1.2)                   |
| Waiting time in the department, mean ( $\pm$ SD)                      | 2.3 ( $\pm$ 0.7)                   |
| <b>Sequence of surgery (cases, n (%))</b>                             |                                    |
| First eye                                                             | 155 (54.8%)                        |
| Second eye                                                            | 128 (45.2%)                        |
| <b>Surgeons' experience (cases, n (%))</b>                            |                                    |
| Senior                                                                | 253 (89.4%)                        |
| Junior                                                                | 30 (10.6%)                         |
| <b>Pain assessment</b>                                                |                                    |
| Low pain-score                                                        | 205 (72,4%)                        |
| High pain-score                                                       | 78 (27,6%)                         |

438

439

## Subjective assessment of the duration of cataract surgery

440

441

**Table 2** Univariate analyses of factors associated with surgery duration.

| Variable                                  | Objective surgery duration |          | Patient-assessed surgery duration |         |
|-------------------------------------------|----------------------------|----------|-----------------------------------|---------|
|                                           | Regression                 |          | Regression                        |         |
|                                           | coefficient (95% CI)       | P        | coefficient (95% CI)              | P       |
|                                           | or                         | P        | or                                | P       |
|                                           | mean ( $\pm$ SD)           | Value*   | mean ( $\pm$ SD)                  | Value*  |
| Age                                       | 0.02 (-0.04-0.86)          | 0.469    | 0.11 (0.03-0.2)                   | 0.011   |
| Gender                                    |                            |          |                                   |         |
| Male                                      | 14.2 ( $\pm$ 5.2)          | 0.317    | 15.8 ( $\pm$ 6.2)                 | 0.184   |
| Female                                    | 13.6 ( $\pm$ 4.8)          |          | 14.8 ( $\pm$ 7.4)                 |         |
| Preoperative visual acuity                | 4.23 (1.75-6.72)           | 0.001    | 0 (-3.5-3.5)                      | 1.00    |
| Schedule on the day of surgery            |                            |          |                                   |         |
| Fasting time                              | 0.27 (-0.04-0.59)          | 0.091    | 0.16 (-0.28-0.60)                 | 0.477   |
| Time interval between wake-up and surgery | 0.49 (0.02-0.95)           | 0.041    | 0.71 (0.07-1.36)                  | 0.03    |
| Waiting time in the department            | 1.15 (0.34-1.96)           | 0.006    | 1.05 (-0.07-2.17)                 | 0.066   |
| Sequence of surgery                       |                            |          |                                   |         |
| First eye                                 | 14.1 ( $\pm$ 5.4)          | 0.036*   | 15.1 ( $\pm$ 6.8)                 | 0.632   |
| Second eye                                | 13.6 ( $\pm$ 4.4)          |          | 15.5 ( $\pm$ 7.0)                 |         |
| Surgeons' experience                      |                            |          |                                   |         |
| Senior                                    | 13.4 ( $\pm$ 4.8)          | <0.0001* | 15.0 ( $\pm$ 6.7)                 | 0.032*  |
| Junior                                    | 17.8 ( $\pm$ 4.7)          |          | 17.8 ( $\pm$ 7.4)                 |         |
| Pain assessment                           |                            |          |                                   |         |
| Low pain-score                            | 13.2 ( $\pm$ 4.5)          | 0.001*   | 14.4 ( $\pm$ 6.5)                 | <0.001* |
| High pain-score                           | 15.5 ( $\pm$ 5.7)          |          | 17.6 ( $\pm$ 7.3)                 |         |

442 \*\* Linear regression for correlation tests and Student's t-test for mean comparison. .

443

## Subjective assessment of the duration of cataract surgery

444 **Table 3** Multivariate analyses of factors associated with surgery duration.

| Variable                       | Objective surgery duration |                     |        | Patient-assessed surgery duration |                     |        |
|--------------------------------|----------------------------|---------------------|--------|-----------------------------------|---------------------|--------|
|                                | Adjusted                   | 95%                 | P      | Adjusted                          | 95%                 | P      |
|                                | Regression Coefficient*    | Confidence Interval | Value  | Regression Coefficient*           | Confidence Interval | Value  |
| Age                            | -                          | -                   | -      | 0.1                               | 0 ; 0.2             | 0.022  |
| Preoperative visual acuity     | 3.6                        | 1.2; 5.9            | 0.002  | -                                 | -                   | -      |
| Waiting time in the department | 0.8                        | 0.1; 1.6            | 0.03   | -                                 | -                   | -      |
| Junior vs. senior Surgeon      | 4.1                        | 2.4; 5.9            | 0.0001 | 3.3                               | 0.8; 5.8            | 0.01   |
| Low vs. high Pain score        | -2.3                       | -3.5; -1.1          | 0.0002 | -3.1                              | -4.8; -1.4          | 0.0004 |

445 \*Regression coefficients adjusted for variables with p values &lt; 0.10 in the univariate analysis.

446

1  
2  
3  
4 Subjective assessment of the duration of cataract surgery  
5  
6

7 **1 Patients' subjective assessment of the duration of cataract surgery:**

8  
9 **2 A case series**  
10  
11  
12 3

13 4 Pierre-Raphael Rothschild<sup>1</sup> MD, Sophie Grabar<sup>2</sup> MD, PhD, Brivael Le Dû<sup>1</sup> MD\*, Cyril

15 5 Temstet<sup>1</sup> MD\*, Olga Rostaqui<sup>1</sup> MD, Antoine P. Brézin<sup>1</sup> MD, PhD.

17 6 \* These 2 authors have equally contributed to this work

19 7 <sup>1</sup> Université Paris Descartes, Hôpital Cochin, Service d'Ophtalmologie, Assistance  
20 8 Publique Hôpitaux de Paris, 27 rue du faubourg Saint-Jacques, 75014 Paris, France.

22 9 <sup>2</sup> Université Paris Descartes, Hôpital Cochin, Service de Biostatistique et Epidémiologie,  
23 10 Assistance Publique Hôpitaux de Paris, 27 rue du faubourg Saint-Jacques, 75014 Paris,  
24 11 France.  
25  
26  
27  
28  
29  
30

31 13 **Dryad provisional DOI to the submission : doi:10.5061/dryad.27sk4**

32 14 Keywords: cataract; surgical procedure; time perception; self-assessment  
33  
34  
35  
36

37 16 Presented in part at the ARVO meeting, Fort Lauderdale, Florida, USA, May 2012  
38  
39  
40

41 18 Word count: Abstract 298 words; text 2397 words, 25 references, 5 figures and tables  
42  
43  
44

45 20 Corresponding author and address reprint requests to Antoine P. Brézin, MD, PhD.

46 21 Université Paris Descartes, Service d'ophtalmologie, Hôpital Cochin, 27 rue du Faubourg  
47 22 Saint-Jacques, 75014 PARIS France, or at antoine.brezin@cch.aphp.fr  
48  
49

50 23 Phone: 33 - 1 58412200

51 24 Fax: 33 - 1 58412210  
52  
53  
54  
55  
56  
57  
58  
59  
60

1  
2  
3  
4 Subjective assessment of the duration of cataract surgery  
5  
6

7 **26 Article summary**

8  
9 **27 Article focus:**

- 10  
11 28 1. Modern cataract surgery is a safe and quick procedure. Nonetheless it remains a  
12  
13 29 stressful event from the patients' standpoint.  
14  
15 30 2. Several factors have been recognized to participate in patients' preoperative  
16  
17 31 anxiety and targeted preoperative counselling has been shown to be of value.  
18  
19 32 3. Though cataract surgery duration is a frequent patient preoperative qualm it has  
20  
21 33 not been properly studied and patient's perception of time is largely unknown.

22 **34 Key messages:**

- 23  
24 35 1. Patients' perceived cataract surgery duration is ~~fair~~reasonably accurate  
25  
26 36 whatever the circumstances.  
27  
28 37 2. Surgeons' experience and pain perception were the two factors independently  
29  
30 38 associated with surgery duration.  
31

32 **39 Strengths and limitations:**

- 33  
34 40 1. The large studied population and the strict definition used for operative time  
35  
36 41 provide reliable measurements of the surgery duration whether objective or  
37  
38 42 patient perceived.  
39  
40 43 2. Anxiety status, chronic illnesses, systemic medications were not part of our  
41  
42 44 standardized study protocol. Moreover all our patients were on sedative  
43  
44 45 medications at the time of surgery. This might have affected patients' perceptions  
45  
46 46 3. The benefit in terms of patient comfort/satisfaction of preoperative information  
47  
48 47 regarding surgery duration needs specific ~~studied~~studies beyond the scope of  
49  
50 48 the present studyreport.  
51

52 49  
53  
54  
55  
56  
57  
58  
59  
60

1  
2  
3  
4 Subjective assessment of the duration of cataract surgery  
5

6  
7 50 **Objectives:** Surgery duration is a source of preoperative anxiety for patients undergoing  
8  
9 51 cataract surgery. To better inform patients we evaluated the agreement between  
10  
11 52 objective and patient perceived surgery duration.

12  
13 53 **Design:** ~~case~~ Case series.

14  
15 54 **Setting:** Public teaching university hospital (Paris, France).

16  
17 55 **Participants:** During the study period, 368 cataract surgery cases performed on 285  
18  
19 56 patients were included, 85 cases were excluded from the final analysis. All patients who  
20  
21 57 had uneventful phacoemulsification were included. Cases with any significant  
22  
23 58 intraoperative adverse event or cases requiring additional anaesthesia other than  
24  
25 59 topical were excluded. Resident performed cases were also excluded.

26  
27 60 **Primary and secondary outcomes:** Procedures were timed (objective duration) and  
28  
29 61 patients were asked, immediately afterwards, to assess the duration of their surgery  
30  
31 62 (patient-assessed duration). The agreement between objective and patient-assessed  
32  
33 63 duration as well as influencing factors was studied.

34  
35 64 **Results:** Mean objective duration ( $13.9 \pm 5$  minutes) and patient-assessed duration  
36  
37 65 ( $15.3 \pm 6.9$  minutes) were significantly correlated (Spearman's  $r = 0.452$ ,  $P < .0001$ ).  
38  
39 66 Furthermore, Bland-Altman analysis and the intraclass correlation coefficient (0.341,  
40  
41 67 95% CI, 0.23-0.44) ~~showed a fair~~ were quite in agreement. On univariate analysis senior-  
42  
43 68 performed procedures were significantly shorter than those performed by juniors (13.4  
44  
45 69 versus 17.8 minutes,  $P = .0001$ ). Pain was recorded as "no sensation" (31.5 % of the  
46  
47 70 cases), "mild sensation" (41 %), "moderate pain" (23.3 %), "intense pain" (3.5 %) and  
48  
49 71 "unbearable pain" (0.7 %). Groups with high pain-score had significantly longer  
50  
51 72 procedures ( $P < .001$ ). Multivariate analysis revealed that the only independent factors  
52  
53 73 associated with both the objective and patient-assessed duration of surgery was  
54  
55 74 surgeon's experience and pain-score.

1  
2  
3  
4  
5  
6  
7  
8  
9  
10  
11  
12  
13  
14  
15  
16  
17  
18  
19  
20  
21  
22  
23  
24  
25  
26  
27  
28  
29  
30  
31  
32  
33  
34  
35  
36  
37  
38  
39  
40  
41  
42  
43  
44  
45  
46  
47  
48  
49  
50  
51  
52  
53  
54  
55  
56  
57  
58  
59  
60

Subjective assessment of the duration of cataract surgery

75 **Conclusions:** In our study, patients' fairly estimated and real the duration of their  
76 surgery in our study showed moderate agreement, suggesting that emotions associated  
77 with eye surgery under topical anaesthesia did not dramatically hinder patients'  
78 perception of time. However, the benefit of preoperative counselling regarding the  
79 duration of surgery will need further evaluation

For peer review only

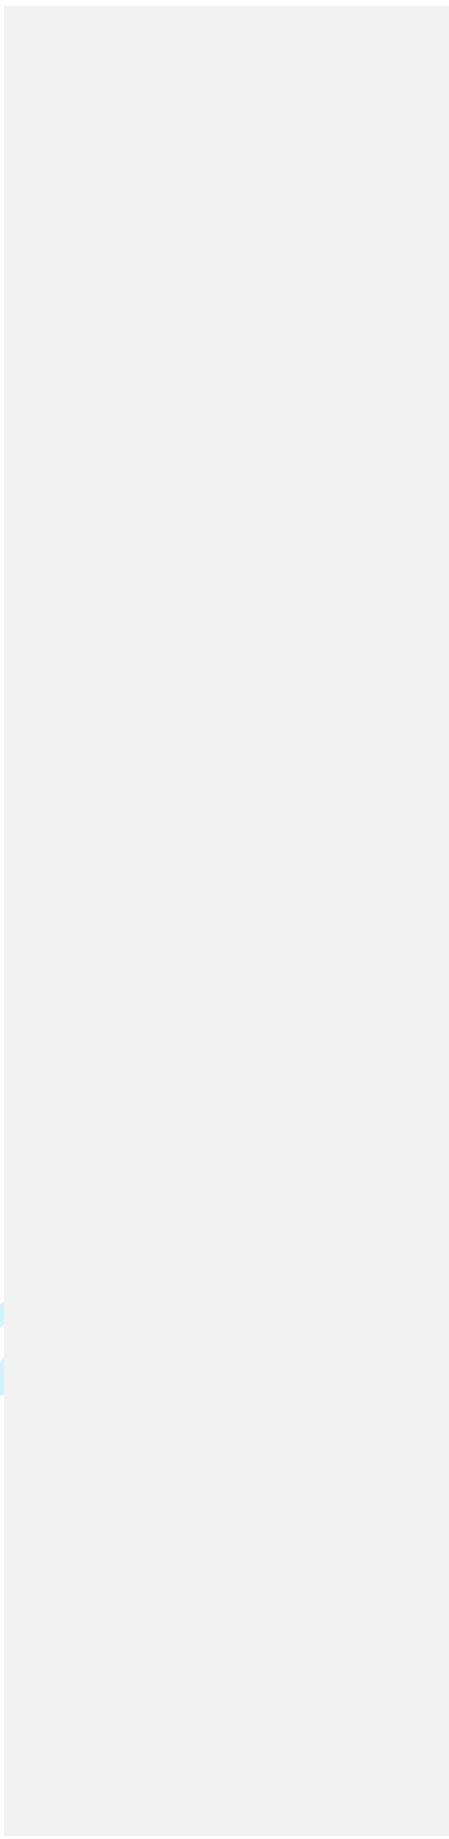



1  
2  
3  
4 Subjective assessment of the duration of cataract surgery  
5

6  
7 80 **INTRODUCTION**  
8

9 81  
10 82 The shortened duration of cataract surgery is one of the striking features owing to the  
11 83 improvement of surgical techniques. Live surgery events and real-time surgical video  
12 84 recordings by elite surgeons nowadays seldom show procedures lasting more than 10  
13 85 minutes. The quickness of modern cataract surgery by phacoemulsification has made  
14 86 topical anaesthesia, whose effects wear off faster than previously used peribulbar  
15 87 injections, the method of choice for analgesia.[1] Nevertheless, whatever the amount of  
16 88 trust patients put in their surgeon, many remain apprehensive of eye surgery under full  
17 89 consciousness or with minimal sedation by systemic administration of drugs. This  
18 90 apprehension is often focused on the fear of involuntary eye movements during the  
19 91 procedure, which may complicate the surgeon's task, on patients' fear of seeing their eye  
20 92 surgery or on the fear of painful sensations. In reply, quite abundant data are now  
21 93 available stemming from several studies focused on the impressions of patients during  
22 94 the procedures.[2 3] Various methods to assess the perception of pain have been used  
23 95 and have validated that cataract surgery under topical anaesthesia is by and large  
24 96 usually a painless procedure.[4] Visual sensations experienced by patients under the  
25 97 operating microscope have also been recorded and have mostly been found to be of no  
26 98 concern.[5 6] In addition to these topics, patients prior to their surgery have frequent  
27 99 qualms regarding the duration of the procedure and hence regarding their ability to  
28 100 withstand their eye surgery under topical anaesthesia.[7] Providing additional targeted  
29 101 information to patients undergoing cataract surgery has been shown to improve their  
30 102 satisfaction.[8]

31 103 This information could include data regarding the duration of the procedure. However,  
32 104 surprisingly, in contrast to the common nature of cataract surgery by modern  
33  
34  
35  
36  
37  
38  
39  
40  
41  
42  
43  
44  
45  
46  
47  
48  
49  
50

1  
2  
3  
4  
5  
6  
7  
8  
9  
10  
11  
12  
13  
14  
15  
16  
17  
18  
19  
20  
21  
22  
23  
24  
25  
26  
27  
28  
29  
30  
31  
32  
33  
34  
35  
36  
37  
38  
39  
40  
41  
42  
43  
44  
45  
46  
47  
48  
49  
50  
51  
52  
53  
54  
55  
56  
57  
58  
59  
60

Subjective assessment of the duration of cataract surgery

105 phacoemulsification, there is scarce data regarding its duration. The purpose of this  
106 study was therefore to compare the objective duration of cataract surgery with the  
107 patients' subjective assessment of this duration.

108

For peer review only



1  
2  
3  
4 Subjective assessment of the duration of cataract surgery  
5

6  
7 109 **METHODS**

8  
9 110  
10 111 The study was set in the department of ophthalmology of Hôpital Cochin, a teaching  
11 112 university hospital located in Paris, France. Data were collected prospectively in  
12 113 consecutive patients operated between May 17, 2011 and July 22, 2011— and was  
13 114 approved by the Institutional Review Board.

Formatted: English (U.S.)

Formatted: English (U.S.)

14  
15  
16  
17 115 All patients who had uneventful phacoemulsification under topical anaesthesia  
18 116 with placement of an intraocular lens in the capsular bag were included. Cases with any  
19 117 “significant adverse event” defined either by a major intraoperative complication such  
20 118 as vitreous loss or by a technical problem such as phacoemulsifier malfunction that  
21 119 prolonged the procedure by 10 minutes or more were excluded. Similarly, patients who  
22 120 required any anaesthesia in addition to topical lidocaine 2% gel, or those who required  
23 121 sedation in addition to the preoperatively given hydroxyzine were excluded from the  
24 122 analyses. Teaching cases involving resident participation were also excluded from the  
25 123 analyses. The duration of the procedure, referred throughout the text as the objective  
26 124 duration, was timed by operating room nurses as the exposure of the patients’ eye to the  
27 125 light of the operating microscope, from the beginning until the end of the surgery.

28  
29 126 The objective duration of surgery was compared to its subjective assessment  
30 127 obtained by questioning patients immediately after drape removal and referred  
31 128 throughout the text as the patient-assessed duration. If the initial patients’ replies were  
32 129 imprecise, a second line of questioning was used requesting patients to assess the  
33 130 duration of their surgery by the minute. To avoid assessment biases, patients were not  
34 131 warned before the surgery that they would be asked to assess the duration of their  
35 132 procedure.

1  
2  
3  
4 Subjective assessment of the duration of cataract surgery  
5

6  
7 133 The patients' perception of pain during surgery was also assessed with a  
8  
9 134 standard numeric scale, graded from 0 to 4: 0 (no pain), 1 (mild sensation), 2 (moderate  
10  
11 135 pain), 3 (intense pain), 4 (unbearable pain) as previously used in other studies.[4 9 10]

12  
13 136 Other factors were also recorded: age, gender, first or second eye surgery, and  
14  
15 137 best corrected preoperative visual acuity. All surgeries were performed between 8:00  
16  
17 138 AM and 2:00 PM and the patients were requested to fast from midnight on the night  
18  
19 139 prior to their surgery. The patients' preoperative schedules were recorded: duration of  
20  
21 140 fasting, time interval between wake-up and surgery, time interval between entry in the  
22  
23 141 department suite and surgery (waiting time in the department). All patients received 0.5  
24  
25 142 mg/kg of hydroxyzine at their time of arrival in our department used as sedative and  
26  
27 143 additive sedation during the surgery when necessary. No other drug was given  
28  
29 144 preoperatively, including non-steroidal anti-inflammatory drugs. The need for  
30  
31 145 additional anaesthetic techniques was recorded.

32  
33 146 Surgeons were categorized as seniors when they had the experience of more than  
34  
35 147 1000 procedures performed prior to the study or as juniors otherwise.

36 148

### 38 149 **Statistical analysis**

39 150 Categorical variables are expressed as numbers (percentages) and comparisons were  
40  
41 151 conducted using the Fisher-exact test. For continuous variables, mean  $\pm$  standard  
42  
43 152 deviation (SD) or median (interquartile range, IQR) are provided, and comparisons were  
44  
45 153 conducted using the Kruskal-Wallis test or the student's t-test.

46  
47 154 To evaluate the agreement between objective and patient-assessed duration, a Bland-  
48  
49 155 Altman plot was used.[11] The differences between the two methods (i.e. objective and  
50  
51 156 patient-assessed duration) are plotted against their mean. The Bland-Altman analysis  
52  
53 157 provides the mean difference (also called bias) as well as the 95% or the 68% limits of

1  
2  
3  
4 Subjective assessment of the duration of cataract surgery  
5

6  
7 158 agreement corresponding respectively to the mean difference  $\pm 2$  SD or  $\pm 1$  SD. When  
8  
9 159 agreement between the two methods is good, most of the differences should reside  
10  
11 160 within the agreement limit interval. We also computed the Intraclass correlation  
12  
13 161 coefficient to quantitatively evaluate the agreement.  
14  
15 162 Correlation tests were conducted using the Spearman's correlation coefficient ( $r$ ).  
16  
17 163 Factors with  $P$  values  $<.10$  in the univariate analysis were included in a multivariate  
18  
19 164 linear regression and ANCOVA model to determine the independent factors associated  
20  
21 165 with either objective or patient-assessed surgery duration.  $P$  Values  $<0.05$  were  
22  
23 166 considered significant. All analyses were performed with XLSTAT 2012.2.02 software  
24  
25 167 (Addinsoft, Paris, France).  
26

27 168  
28  
29  
30  
31  
32  
33  
34  
35  
36  
37  
38  
39  
40  
41  
42  
43  
44  
45  
46  
47  
48  
49  
50  
51  
52  
53  
54  
55  
56  
57  
58  
59  
60

1  
2  
3  
4 Subjective assessment of the duration of cataract surgery  
5

6  
7 **RESULTS**

8  
9 A total of 283 cases performed in 218 patients ~~were~~ analyzed after exclusion of 85  
10 cases (65 patients) which met one or more exclusion criteria as detailed herein.  
11 Resident participation was the most frequent motive for exclusion (70 cases). Other  
12 causes were significant intraoperative adverse events including posterior capsular  
13 break or zonular disinsertion (8 cases) and phacoemulsifier breakdown (1 case). Four  
14 out the 8 cases presenting intraoperative vitreous loss had an identifiable risk factor for  
15 this complication: two were traumatic cataracts and two were cataracts related to  
16 severe pseudoexfoliation syndrome. Thirteen cases required additional anaesthesia or  
17 sedation including sub-Tenon's block (5 cases), sub-conjunctival injection (1 case),  
18 intracameral injection of lidocaine (1 case) and/or midazolam intravenous sedation (6  
19 cases). Nine cases were excluded for significant intraoperative adverse event including  
20 posterior capsular break or zonular disinsertion (8 cases) and phacoemulsifier  
21 breakdown (1 case). Four out the 8 cases presenting intraoperative vitreous loss had an  
22 identifiable risk factor for this complication, two were traumatic cataracts, and two were  
23 cataracts related to severe pseudoexfoliation syndrome. Thirteen other cases required  
24 additional anaesthesia or sedation and were therefore excluded. Those included sub-  
25 Tenon's block (5 cases), sub conjunctival injection (1 case), intracameral injection of  
26 lidocaine (1 case) and midazolam intravenous sedation (6 cases). Finally 70 cases  
27 involving resident participation were excluded. Characteristics of the study population,  
28 patients' schedule on the day of surgery, sequence of procedures, phacoemulsifiers used  
29 and surgery duration are shown in table 1. No sensation was reported in 106 (31.5 %)  
30 cases, a mild sensation in 147 (41 %) cases, moderate pain in 90 (23.3 %) cases, intense  
31 pain in 14 (3.5 %) cases and unbearable pain in 2 (0.7 %) cases. The perception of pain  
32 did not significantly differ between first and second eye procedures. Out of 155 patients  
33  
34  
35  
36  
37  
38  
39  
40  
41  
42  
43  
44  
45  
46  
47  
48  
49  
50  
51  
52  
53  
54  
55

56  
57  
58  
59  
60  
10

Formatted: Font: Not Italic

1  
2  
3  
4 Subjective assessment of the duration of cataract surgery

5  
6  
7 195 operated in their first eye 113 patients (73%), reported low pain [no or mild sensation  
8  
9 196 (score 0 or 1)], while 92 of 128 patients (72%) operated on their second eye rated their  
10  
11 197 sensations similarly ( $p=0.9$ ).

### 12 198 **Comparison between objective and patient-assessed duration**

13  
14 199 The mean objective surgery duration was 13.9 ( $\pm 5$ ) minutes and the mean patient-  
15  
16 200 assessed duration was 15.3 ( $\pm 6.9$ ) minutes. Bland-Altman plot showed a fair agreement  
17  
18 201 between the objective and patient-assessed duration (fig 1). Mean difference (or bias)  
19  
20 202 was only 1.4 minute (95% CI, 0.63-2.15 minute). However an agreement worsening was  
21  
22 203 noted for longer procedures but error was equally distributed over and under the limits  
23  
24 204 of agreement (-11.3-14.1 minutes). Intraclass correlation coefficient was 0.341 (95% CI,  
25  
26 205 0.23-0.44) suggesting moderate agreement between the objective and patient-assessed  
27  
28 206 duration.

29  
30 207 A significant correlation between the objective and patient-assessed duration of the  
31  
32 208 surgery was observed (Spearman's  $r = 0.452$ ,  $P < .0001$ ).

### 33 209 **Factors associated with objective surgery duration**

34  
35  
36 210 On univariate analysis, objective surgery duration was significantly correlated to  
37  
38 211 preoperative VA ( $p=0.001$ ), time interval between wake-up and surgery ( $p=0.041$ ), and  
39  
40 212 to the waiting time in the department ( $p=0.006$ ). The corresponding regression  
41  
42 213 coefficients and 95 % CI are provided in table 2. Similarly, objective duration was  
43  
44 214 significantly different according to surgeon experience with shorter procedures for  
45  
46 215 seniors ( $13.4 \pm 4.8$  minutes) compared to juniors ( $17.8 \pm 4.7$ )(fig 2). Objective duration  
47  
48 216 was significantly different according to pain-score group with significantly longer  
49  
50 217 procedures in groups with high pain-scores (score 4, 3 and 2) compared to groups with  
51  
52 218 low pain scores (score 0 or 1) with mean surgery durations of 15.5 ( $\pm 5.7$ ) and 13.2

1  
2  
3  
4 Subjective assessment of the duration of cataract surgery

5  
6 219 ( $\pm 4.5$ ) respectively (fig 3). Objective duration was significantly different between first  
7  
8 220 and second eye procedures but not according to gender (table 2).

9  
10 221 Multivariate analysis revealed patient preoperative visual acuity, waiting time in  
11  
12 222 the department, surgeon experience and pain-score group to be independent factors  
13  
14 223 associated with objective surgery duration (table 3).

15  
16 224 **Factors associated with patient-assessed surgery duration**

17  
18 225 On univariate analysis, patient-assessed surgery duration was correlated to patient age  
19  
20 226 ( $p=0.011$ ), and time interval between wake-up and surgery ( $p=0.03$ ). The corresponding  
21  
22 227 regression coefficients and 95% CI are provided in table 2. Similarly, patient-assessed  
23  
24 228 duration was also significantly different according to surgeon experience ( $p=0.032$ ) and  
25  
26 229 according to pain-score group ( $p=0.001$ ). Conversely, patient-assessed duration was not  
27  
28 230 significantly different between first and second eye procedures or according to gender.

29  
30 231 Multivariate analysis revealed patient age, surgeon experience and pain-score  
31  
32 232 group to be independent factors associated with patient-assessed surgery duration  
33  
34 233 (table 3).

35  
36 234  
37  
38  
39  
40  
41  
42  
43  
44  
45  
46  
47  
48  
49  
50  
51  
52  
53  
54  
55  
56  
57  
58  
59  
60



1  
2  
3  
4 Subjective assessment of the duration of cataract surgery  
5

6  
7 235 **DISCUSSION**  
8 236

9 237 Our study showed that patients overall fairly estimated the duration of their surgery and  
10 238 that the two independent factors associated with both the objective and subjective  
11 239 surgery duration were surgeon's experience and pain-score.  
12

13  
14 240 The objective duration of cataract surgery by modern phacoemulsification has  
15 241 not been the main outcome measure of previous studies, but has occasionally been  
16 242 assessed mainly in analyzes of the effects of teaching or as a secondary outcome. [12 13]  
17  
18 243 When reported, the duration of surgery ranged from an average of 30 minutes in studies  
19 244 published in 2003 to 15-19 minutes in more recent reports.[14-17]. Our objective  
20 245 measure of procedures lasting 13 minutes is in line with this shortening that most  
21 246 probably stems from improvements in the technique of cataract surgery, including  
22 247 suture less clear corneal micro incisions. As shown previously, our data confirmed that  
23 248 experienced surgeons are quicker than more junior ophthalmologists.[12 13] In our  
24 249 study, the surgeon's experience factor was independently associated with both the  
25 250 objective and subjective surgery duration.  
26

27  
28 251 The subjective perception of time by patients undergoing cataract surgery under  
29 252 topical anaesthesia has never been studied either. Preparations for surgery include the  
30 253 testing of phacoemulsifiers, applying topical anaesthesia, preoperative disinfection of  
31 254 the eye by povidone-iodine, draping and placement of a lid speculum. These steps may  
32 255 take as long as the surgical procedure itself or even in some instances may take longer  
33 256 than the surgery. From the patients' perspective distinguishing these preoperative  
34 257 stages from their surgery per se may be difficult. To minimize this bias when seeking our  
35 258 patients' subjective assessment of the duration of their surgery, we specifically asked for  
36 259 their impression of the elapsed time between the illumination of their eye under the  
37 260 operating microscope until the removal of the drapes. However, this time interval both  
38  
39  
40  
41  
42  
43  
44  
45  
46  
47  
48  
49  
50  
51  
52  
53  
54

1  
2  
3  
4 Subjective assessment of the duration of cataract surgery

5  
6  
7 261 subjectively assessed and clocked by nurses may have added approximately 1 or 2 extra  
8  
9 262 minutes to the real time of the surgery, as the surgeons adjusted the focus of the  
10  
11 263 microscope and made their final preparations for the procedure.

12 264 The assessment of pain was a secondary outcome measure in our study and we  
13  
14 265 used the simple 5-step scale as validated in other studies.[4 9 10] A lack of sensation or a  
15  
16 266 mild sensation were reported in 72.4% of cases, moderate pain in 23.3% cases and  
17  
18 267 intense or even unbearable pain in 4.3% of cases. These percentages are comparable to  
19  
20 268 previous reports using the same 5-step pain-score scale.[9] Unsurprisingly, the  
21  
22 269 perception of pain was correlated with the duration of procedures. In our study, the  
23  
24 270 pain-score group was independently associated with both the objective and subjective  
25  
26 271 surgery duration. In a previous study patients tended to report their second eye surgery  
27  
28 272 as more painful than their first eye surgery and this finding was related to a decreased  
29  
30 273 preoperative anxiety at the time of the second procedure.[16] However, this finding was  
31  
32 274 not observed in our study, nor in another recent report.[18] This discrepancy could be  
33  
34 275 due to the preoperative sedation given to all our patients. Such medications can alter the  
35  
36 276 perception of pain as well as the perception of duration and also aim at reducing anxiety.  
37  
38 277 Similarly, we did not account for the patients' systemic medications or illnesses, if any,  
39  
40 278 which could also have altered their judgment and their pain thresholds.

41  
42 279 Preoperative standardized grading of cataracts or pupil size was not recorded in  
43  
44 280 our study. Patient age may however be used as a surrogate parameter influencing the  
45  
46 281 grade of the cataract.[19 20] In nuclear cataracts preoperative visual acuity may also be  
47  
48 282 correlated to its grade.[21] Our data confirmed that the objective duration of surgery  
49  
50 283 was longer in cases with worse preoperative visual acuity, as more advanced cataracts  
51  
52 284 require a longer duration of ultrasonic power release.[22] Surprisingly, the age of the  
53  
54 285 patient was not correlated with objective surgery duration but with patient-assessed

1  
2  
3  
4 Subjective assessment of the duration of cataract surgery  
5

6  
7 286 surgery duration, though weakly. The chop technique may result in quicker procedures,  
8  
9 287 however the evaluation of the effect of surgical techniques on the duration of surgery  
10  
11 288 was not within the scope of our study.[23]

12  
13 289 Most patients quite correctly assessed the duration of their surgery, though the  
14  
15 290 correlation with objective surgery duration was only moderate and samples were large.  
16  
17 291 Hence, we were not able to identify specific characteristics significantly associated with  
18  
19 292 an underestimation or an overestimation of time. Although evidence suggests that  
20  
21 293 fasting prior to cataract surgery under topical anaesthesia can be abandoned, in this  
22  
23 294 series patients fasted from midnight on the day prior to their surgery.[24] As our  
24  
25 295 patients were operated from 8:00 AM to 2:00 PM, fasting time varied from one case to  
26  
27 296 another, but these variations did not influence the subjective assessment of the duration  
28  
29 297 of surgery. Similarly, we thought that an early arrival and a subsequent long waiting in  
30  
31 298 the department of ophthalmology prior to entry in the operating room could be a factor  
32  
33 299 of stress resulting in an over-assessment of the duration of their surgery by patients. Yet  
34  
35 300 our analysis did not reveal that this factor played any role. We unexpectedly observed  
36  
37 301 that the time interval between wakeup and surgery, as well as waiting time in the  
38  
39 302 department, were associated with longer procedures. This might have been linked to  
40  
41 303 surgeons slowing down after a number of cases. Although it has been suggested that  
42  
43 304 handholding may reduce anxiety and the perception of pain during cataract surgery, this  
44  
45 305 was not applied in our practice.[25]

46  
47 306 Our study showed that patients overall fairly estimated the duration of their  
48  
49 307 surgery. The trend in the past decades has been towards a constant reduction of the  
50  
51 308 duration of procedures in eye surgery. As new technical improvements are under way,  
52  
53 309 such as femtosecond laser-assisted cataract surgery, the fact that patients are rather  
54  
55 310 acutely aware of the duration of procedures must be taken into consideration as an

1  
2  
3  
4  
5  
6  
7  
8  
9  
10  
11  
12  
13  
14  
15  
16  
17  
18  
19  
20  
21  
22  
23  
24  
25  
26  
27  
28  
29  
30  
31  
32  
33  
34  
35  
36  
37  
38  
39  
40  
41  
42  
43  
44  
45  
46  
47  
48  
49  
50  
51  
52  
53  
54  
55  
56  
57  
58  
59  
60

Subjective assessment of the duration of cataract surgery

311 important parameter for their comfort. . However, proving the benefit of preoperative  
312 counselling in terms of patient satisfaction would require a specific study beyond the  
313 scope of this report  
314

For peer review only



1  
2  
3  
4 Subjective assessment of the duration of cataract surgery  
5

6  
7 315 | **Acknowledgments**

Formatted: English (U.S.)

8 316 Jean-Baptiste Daudin, MD and Dominique Monnet MD, PhD provided and cared for study  
9 317 patients.

10  
11  
12 318 | **Funding**

Formatted: English (U.S.)

13  
14 319 The study was supported by the Association d'Ophtalmologie de Cochin, Paris, France

15  
16 320 | **Competing interests**

Formatted: English (U.S.)

17 321 The authors have no conflict of interest related to results presented in this study.  
18  
19  
20 322

21  
22 323 | **Contributorship Statement**

Formatted: English (U.S.)

23  
24 324 Only the below listed authors qualify for authorship according to the ICMJE criteria:

25  
26 325 Pierre-Raphael Rothschild substantially participated in the following:

- 27  
28 326 1) Conception and design, acquisition of data, and analysis and interpretation of data  
29  
30 327 2) Drafting the article and revising it critically for important intellectual content  
31  
32 328 3) Final approval of the version to be published

33  
34 329 Sophie Grabar substantially participated in the following:

- 35  
36 330 1) Conception and design, and analysis and interpretation of data  
37  
38 331 2) Drafting the article and revising it critically for important intellectual content  
39  
40 332 3) Final approval of the version to be published

41  
42 333  
43 334 Brivael Le Dû substantially participated in the following:

- 44  
45 335 1) Conception and design, acquisition of data, and analysis and interpretation of data  
46  
47 336 2) Drafting the article and revising it critically for important intellectual content  
48  
49 337 3) Final approval of the version to be published

50  
51 338  
52  
53 339 Cyril Temstet substantially participated in the following:  
54  
55  
56  
57  
58  
59  
60

1  
2  
3  
4  
5  
6  
7  
8  
9  
10  
11  
12  
13  
14  
15  
16  
17  
18  
19  
20  
21  
22  
23  
24  
25  
26  
27  
28  
29  
30  
31  
32  
33  
34  
35  
36  
37  
38  
39  
40  
41  
42  
43  
44  
45  
46  
47  
48  
49  
50  
51  
52  
53  
54  
55  
56  
57  
58  
59  
60

Subjective assessment of the duration of cataract surgery

- 340 1) Conception and design, acquisition of data, and analysis and interpretation of data  
341 2) Drafting the article and revising it critically for important intellectual content  
342 3) Final approval of the version to be published

343

344 Olga Rostaqui substantially participated in the following:

- 345 1) Conception and design, acquisition of data  
346 2) Drafting the article and revising it critically for important intellectual content  
347 3) Final approval of the version to be published

348

349 Antoine P. Brézin substantially participated in the following:

- 350 1) Conception and design, acquisition of data, and analysis and interpretation of data  
351 2) Drafting the article and revising it critically for important intellectual content  
352 3) Final approval of the version to be published

353

1  
2  
3  
4 Subjective assessment of the duration of cataract surgery  
5

6  
7 354 **REFERENCES**

- 8 355  
9 356 1. Leaming DV. Practice styles and preferences of ASCRS members--2003 survey. J  
10  
11 357 Cataract Refract Surg 2004;**30**:892-900  
12  
13 358 2. Fagerstrom R. Fear of a cataract operation in aged persons. Psychol Rep  
14  
15 359 1993;**72**:1339-46  
16  
17 360 3. Nijkamp MD, Kenens CA, Dijker AJ, et al. Determinants of surgery related anxiety in  
18  
19 361 cataract patients. Br J Ophthalmol 2004;**88**:1310-4  
20  
21 362 4. Davison M, Padroni S, Bunce C, et al. Sub-Tenon's anaesthesia versus topical  
22  
23 363 anaesthesia for cataract surgery. Cochrane Database Syst Rev 2007(3):CD006291  
24  
25 364 5. Newman DK. Visual experience during phacoemulsification cataract surgery under  
26  
27 365 topical anaesthesia. Br J Ophthalmol 2000;**84**:13-5  
28  
29 366 6. Yaylali V, Yildirim C, Tatlipinar S, et al. Subjective visual experience and pain level  
30  
31 367 during phacoemulsification and intraocular lens implantation under topical  
32  
33 368 anaesthesia. Ophthalmologica 2003;**217**:413-6  
34  
35 369 7. Nijkamp MD, Ruiters RA, Roeling M, et al. Factors related to fear in patients undergoing  
36  
37 370 cataract surgery: a qualitative study focusing on factors associated with fear and  
38  
39 371 reassurance among patients who need to undergo cataract surgery. Patient Educ  
40  
41 372 Couns 2002;**47**:265-72  
42  
43 373 8. Haripriya A, Tan CS, Venkatesh R, et al. Effect of preoperative counseling on fear from  
44  
45 374 visual sensations during phacoemulsification under topical anesthesia. J Cataract  
46  
47 375 Refract Surg 2011;**37**:814-8  
48  
49 376 9. Vielpeau I, Billotte C, Kreidie J, et al. [Comparative study between topical anesthesia  
50  
51 377 and sub-Tenon's capsule anesthesia for cataract surgery]. J Fr Ophtalmol  
52  
53 378 1999;**22**:48-51  
54  
55  
56  
57  
58  
59  
60

1  
2  
3  
4  
5  
6  
7  
8  
9  
10  
11  
12  
13  
14  
15  
16  
17  
18  
19  
20  
21  
22  
23  
24  
25  
26  
27  
28  
29  
30  
31  
32  
33  
34  
35  
36  
37  
38  
39  
40  
41  
42  
43  
44  
45  
46  
47  
48  
49  
50  
51  
52  
53  
54  
55  
56  
57  
58  
59  
60

Subjective assessment of the duration of cataract surgery

- 379 10. Roman S, Auclin F, Ullern M. Topical versus peribulbar anesthesia in cataract  
380 surgery. *J Cataract Refract Surg* 1996;**22**:1121-4
- 381 11. Bland JM, Altman DG. Statistical methods for assessing agreement between two  
382 methods of clinical measurement. *Lancet* 1986;**1**:307-10
- 383 12. Hosler MR, Scott IU, Kunselman AR, et al. Impact of resident participation in cataract  
384 surgery on operative time and cost. *Ophthalmology* 2012;**119**:95-8
- 385 13. Wiggins MN, Warner DB. Resident physician operative times during cataract surgery.  
386 *Ophthalmic Surg Lasers Imaging* 2010;**41**:518-22
- 387 14. Tranos PG, Wickremasinghe SS, Sinclair N, et al. Visual perception during  
388 phacoemulsification cataract surgery under topical and regional anaesthesia.  
389 *Acta Ophthalmol Scand* 2003;**81**:118-22
- 390 15. Wickremasinghe SS, Tranos PG, Sinclair N, et al. Visual perception during  
391 phacoemulsification cataract surgery under subtenons anaesthesia. *Eye (Lond)*  
392 2003;**17**:501-5
- 393 16. Ursea R, Feng MT, Zhou M, et al. Pain perception in sequential cataract surgery:  
394 comparison of first and second procedures. *J Cataract Refract Surg*  
395 2011;**37**:1009-14
- 396 17. Ang CL, Au Eong KG, Lee SS, et al. Patients' expectation and experience of visual  
397 sensations during phacoemulsification under topical anaesthesia. *Eye (Lond)*  
398 2007;**21**:1162-7
- 399 18. Bardocci A, Ciucci F, Lofoco G, et al. Pain during second eye cataract surgery under  
400 topical anesthesia: an intraindividual study. *Graefes Arch Clin Exp Ophthalmol*  
401 2011;**249**:1511-4



1  
2  
3  
4 Subjective assessment of the duration of cataract surgery  
5

- 6  
7 402 19. Chylack LT, Jr., Wolfe JK, Singer DM, et al. The Lens Opacities Classification System  
8  
9 403 III. The Longitudinal Study of Cataract Study Group. Arch Ophthalmol  
10 404 1993;**111**:831-6  
11  
12 405 20. Age-Related Eye Disease Study Research G. The age-related eye disease study  
13  
14 406 (AREDS) system for classifying cataracts from photographs: AREDS report no. 4.  
15  
16 407 Am J Ophthalmol 2001;**131**:167-75  
17  
18 408 21. Nangia V, Jonas JB, Sinha A, et al. Visual acuity and associated factors. The Central  
19  
20 409 India Eye and Medical Study. PLoS One 2011;**6**:e22756  
21  
22 410 22. Nixon DR. Preoperative cataract grading by Scheimpflug imaging and effect on  
23  
24 411 operative fluidics and phacoemulsification energy. J Cataract Refract Surg  
25  
26 412 2010;**36**:242-6  
27  
28 413 23. Wong T, Hingorani M, Lee V. Phacoemulsification time and power requirements in  
29  
30 414 phaco chop and divide and conquer nucleofractis techniques. J Cataract Refract  
31  
32 415 Surg 2000;**26**:1374-8  
33  
34 416 24. Sanmugasunderam S, Khalfan A. Is fasting required before cataract surgery? A  
35  
36 417 retrospective review. Can J Ophthalmol 2009;**44**:655-6  
37  
38 418 25. Modi N, Shaw S, Allman K, et al. Local anaesthetic cataract surgery: factors  
39  
40 419 influencing perception of pain, anxiety and overall satisfaction. J Perioper Pract  
41  
42 420 2008;**18**:28-33  
43  
44 421  
45 422

1  
2  
3  
4 Subjective assessment of the duration of cataract surgery  
5

6 423 **TABLE AND FIGURE LEGENDS**  
7

8 424  
9

10 425 **Table 1.** Patient population, preoperative schedule and surgical procedures.  
11

12 426 **Table 2** Univariate analyses of factors associated with surgery duration.  
13

14 427 **Table 3** Multivariate analyses of factors associated with surgery duration.  
15  
16 428

17  
18 429  
19

20 430 **Figure 1.** Bland-Altman plot between objective and patient-assessed surgery duration.  
21

22 431 The solid line indicates the mean difference (or bias); the blue and red dash lines  
23

24 432 indicate the 95% and 68% limits of agreement respectively.  
25

26 433 **Figure 2.** Objective surgery duration according to the surgeons' experience. The bar in  
27

28 434 the box indicates the median, the cross the mean and the lower and upper hinge the  
29

30 435 interquartile range. The whisker extends to the most extreme data point which is no  
31

32 436 more than 1.5 times the interquartile range. Dots represent values outside the fences  
33

34 437 (outliers).\*Student's t-test  
35

36 438 **Figure 3.** Objective surgery duration according to the pain-score group. The bar in the  
37

38 439 box indicates the median, the cross the mean and the lower and upper hinge the  
39

40 440 interquartile range. The whisker extends to the most extreme data point which is no  
41

42 441 more than 1.5 times the interquartile range. Dots represent values outside the fences  
43

44 442 (outliers).\*Kruskal-Wallis test  
45  
46  
47  
48  
49  
50  
51  
52  
53  
54  
55

1  
2  
3  
4 Subjective assessment of the duration of cataract surgery  
5  
6

7 **Table 1 Patient population, preoperative schedule and surgical**  
8 **procedures**

| Variable                                                       | Value             |
|----------------------------------------------------------------|-------------------|
| Patients (n)                                                   | 218               |
| Cataract surgery cases (n)                                     | 283               |
| Age (mean years ( $\pm$ SD))                                   | 73.2 ( $\pm$ 9.3) |
| Gender (cases, n (%))                                          |                   |
| Male                                                           | 132 (46.6%)       |
| Female                                                         | 151 (53.4%)       |
| Preoperative visual acuity (Mean LogMAR ( $\pm$ SD))           | 0.4 ( $\pm$ 0.2)  |
| Schedule on the day of surgery (hours)                         |                   |
| Fasting time, mean ( $\pm$ SD)                                 | 14 ( $\pm$ 1.8)   |
| Time interval between wake-up and surgery,<br>mean ( $\pm$ SD) | 4.6 ( $\pm$ 1.2)  |
| Waiting time in the department, mean ( $\pm$ SD)               | 2.3 ( $\pm$ 0.7)  |
| Sequence of surgery (cases, n (%))                             |                   |
| First eye                                                      | 155 (54.8%)       |
| Second eye                                                     | 128 (45.2%)       |
| Surgeons' experience (cases, n (%))                            |                   |
| Senior                                                         | 253 (89.4%)       |
| Junior                                                         | 30 (10.6%)        |
| Pain assessment                                                |                   |
| Low pain-score                                                 | 205 (72,4%)       |
| High pain-score                                                | 78 (27,6%)        |

42 443  
43 444  
44  
45  
46  
47  
48  
49  
50  
51  
52  
53  
54  
55  
56  
57  
58  
59  
60

Subjective assessment of the duration of cataract surgery

445  
446 **Table 2** Univariate analyses of factors associated with surgery duration.

| Variable                                  | Objective surgery duration |          | Patient-assessed surgery duration |         |
|-------------------------------------------|----------------------------|----------|-----------------------------------|---------|
|                                           | Regression                 |          | Regression                        |         |
|                                           | coefficient (95% CI)       |          | coefficient (95% CI)              |         |
|                                           | or                         | P        | or                                | P       |
|                                           | mean ( $\pm$ SD)           | Value*   | mean ( $\pm$ SD)                  | Value*  |
| Age                                       | 0.02 (-0.04-0.86)          | 0.469    | 0.11 (0.03-0.2)                   | 0.011   |
| Gender                                    |                            |          |                                   |         |
| Male                                      | 14.2 ( $\pm$ 5.2)          | 0.317    | 15.8 ( $\pm$ 6.2)                 | 0.184   |
| Female                                    | 13.6 ( $\pm$ 4.8)          |          | 14.8 ( $\pm$ 7.4)                 |         |
| Preoperative visual acuity                | 4.23 (1.75-6.72)           | 0.001    | 0 (-3.5-3.5)                      | 1.00    |
| Schedule on the day of surgery            |                            |          |                                   |         |
| Fasting time                              | 0.27 (-0.04-0.59)          | 0.091    | 0.16 (-0.28-0.60)                 | 0.477   |
| Time interval between wake-up and surgery | 0.49 (0.02-0.95)           | 0.041    | 0.71 (0.07-1.36)                  | 0.03    |
| Waiting time in the department            | 1.15 (0.34-1.96)           | 0.006    | 1.05 (-0.07-2.17)                 | 0.066   |
| Sequence of surgery                       |                            |          |                                   |         |
| First eye                                 | 14.1 ( $\pm$ 5.4)          | 0.036*   | 15.1 ( $\pm$ 6.8)                 | 0.632   |
| Second eye                                | 13.6 ( $\pm$ 4.4)          |          | 15.5 ( $\pm$ 7.0)                 |         |
| Surgeons' experience                      |                            |          |                                   |         |
| Senior                                    | 13.4 ( $\pm$ 4.8)          | <0.0001* | 15.0 ( $\pm$ 6.7)                 | 0.032*  |
| Junior                                    | 17.8 ( $\pm$ 4.7)          |          | 17.8 ( $\pm$ 7.4)                 |         |
| Pain assessment                           |                            |          |                                   |         |
| Low pain-score                            | 13.2 ( $\pm$ 4.5)          | 0.001*   | 14.4 ( $\pm$ 6.5)                 | <0.001* |
| High pain-score                           | 15.5 ( $\pm$ 5.7)          |          | 17.6 ( $\pm$ 7.3)                 |         |

447 **\*\*** Linear regression for correlation tests and Student's t-test for mean comparison.

448 Linear regression for continuous variables and Students' t-test for categorical variables.

## Subjective assessment of the duration of cataract surgery

450 **Table 3** Multivariate analyses of factors associated with surgery duration.

| Variable                       | Objective surgery duration       |                         |         | Patient-assessed surgery duration |                         |         |
|--------------------------------|----------------------------------|-------------------------|---------|-----------------------------------|-------------------------|---------|
|                                | Adjusted Regression Coefficient* | 95% Confidence Interval | P Value | Adjusted Regression Coefficient*  | 95% Confidence Interval | P Value |
| Age                            | -                                | -                       | -       | 0.1                               | 0 ; 0.2                 | 0.022   |
| Preoperative visual acuity     | 3.6                              | 1.2; 5.9                | 0.002   | -                                 | -                       | -       |
| Waiting time in the department | 0.8                              | 0.1; 1.6                | 0.03    | -                                 | -                       | -       |
| Junior vs. senior Surgeon      | 4.1                              | 2.4 ; 5.9               | 0.0001  | 3.3                               | 0.8 ; 5.8               | 0.01    |
| Low vs. high Pain score        | -2.3                             | -3.5 ; -1.1             | 0.0002  | -3.1                              | -4.8 ; -1.4             | 0.0004  |

451 \*Regression coefficients adjusted for variables with p values < 0.10 in the univariate analysis.  
 452

1  
2  
3  
4  
5  
6  
7  
8  
9  
10  
11  
12  
13  
14  
15  
16  
17  
18  
19  
20  
21  
22  
23  
24  
25  
26  
27  
28  
29  
30  
31  
32  
33  
34  
35  
36  
37  
38  
39  
40  
41  
42  
43  
44  
45  
46  
47  
48  
49  
50  
51  
52  
53  
54  
55  
56  
57  
58  
59  
60

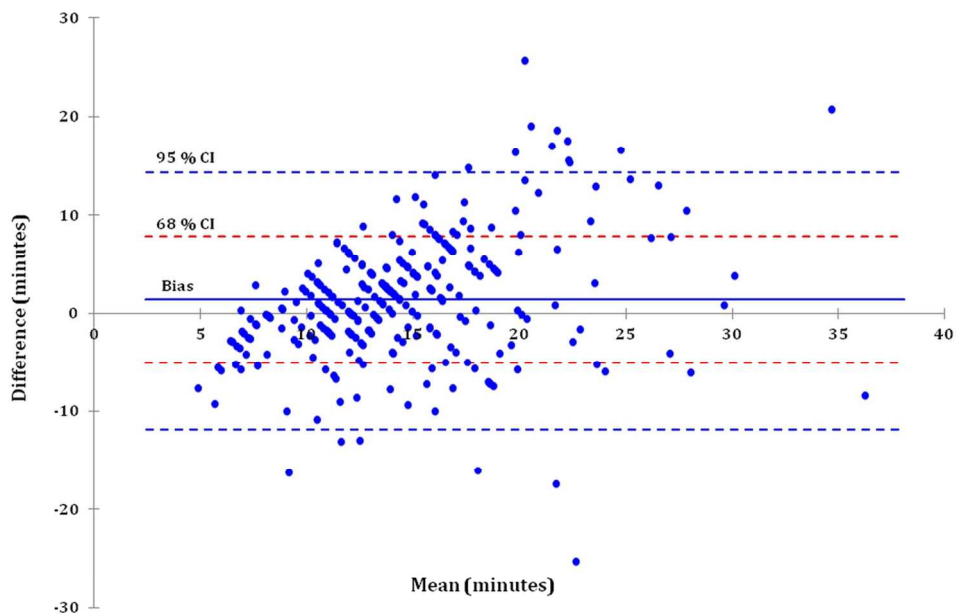

Bland-Altman plot between objective and patient-assessed surgery duration. The solid line indicates the mean difference (or bias); the blue and red dash lines indicate the 95% and 68% limits of agreement respectively.  
119x90mm (300 x 300 DPI)

Peer Review Only

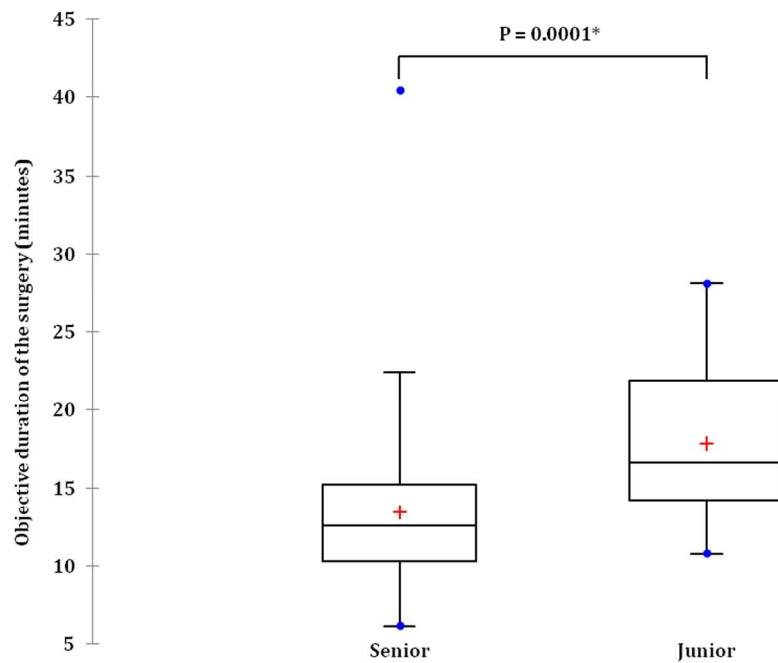

Objective surgery duration according to the surgeons' experience. The bar in the box indicates the median, the cross the mean and the lower and upper hinge the interquartile range. The whisker extends to the most extreme data point which is no more than 1.5 times the interquartile range. Dots represent values outside the fences (outliers). \*Student's t-test

1  
2  
3  
4  
5  
6  
7  
8  
9  
10  
11  
12  
13  
14  
15  
16  
17  
18  
19  
20  
21  
22  
23  
24  
25  
26  
27  
28  
29  
30  
31  
32  
33  
34  
35  
36  
37  
38  
39  
40  
41  
42  
43  
44  
45  
46  
47  
48  
49  
50  
51  
52  
53  
54  
55  
56  
57  
58  
59  
60

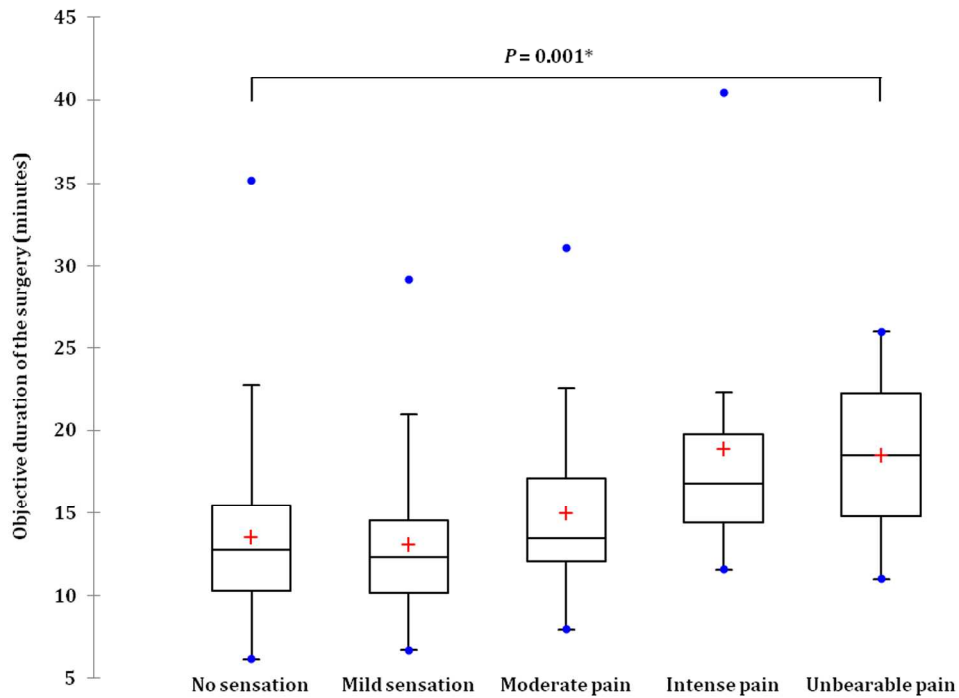

Objective surgery duration according to the pain-score group. The bar in the box indicates the median, the cross the mean and the lower and upper hinge the interquartile range. The whisker extends to the most extreme data point which is no more than 1.5 times the interquartile range. Dots represent values outside the fences (outliers). \*Kruskal-Wallis test

Peer Review Only



STROBE 2007 (v4) Statement—Checklist of items that should be included in reports of *cohort studies*

| Section/Topic                | Item # | Recommendation                                                                                                                                                                       | Reported on page # |
|------------------------------|--------|--------------------------------------------------------------------------------------------------------------------------------------------------------------------------------------|--------------------|
| Title and abstract           | 1      | (a) Indicate the study's design with a commonly used term in the title or the abstract                                                                                               | 1 and 3            |
|                              |        | (b) Provide in the abstract an informative and balanced summary of what was done and what was found                                                                                  | 3                  |
| <b>Introduction</b>          |        |                                                                                                                                                                                      |                    |
| Background/rationale         | 2      | Explain the scientific background and rationale for the investigation being reported                                                                                                 | 5                  |
| Objectives                   | 3      | State specific objectives, including any prespecified hypotheses                                                                                                                     | 6                  |
| <b>Methods</b>               |        |                                                                                                                                                                                      |                    |
| Study design                 | 4      | Present key elements of study design early in the paper                                                                                                                              | 7                  |
| Setting                      | 5      | Describe the setting, locations, and relevant dates, including periods of recruitment, exposure, follow-up, and data collection                                                      | 7                  |
| Participants                 | 6      | (a) Give the eligibility criteria, and the sources and methods of selection of participants. Describe methods of follow-up                                                           | 7                  |
|                              |        | (b) For matched studies, give matching criteria and number of exposed and unexposed                                                                                                  | Not applicable     |
| Variables                    | 7      | Clearly define all outcomes, exposures, predictors, potential confounders, and effect modifiers. Give diagnostic criteria, if applicable                                             | 7, 8               |
| Data sources/<br>measurement | 8*     | For each variable of interest, give sources of data and details of methods of assessment (measurement). Describe comparability of assessment methods if there is more than one group | 7                  |
| Bias                         | 9      | Describe any efforts to address potential sources of bias                                                                                                                            | 7                  |
| Study size                   | 10     | Explain how the study size was arrived at                                                                                                                                            | 7                  |
| Quantitative variables       | 11     | Explain how quantitative variables were handled in the analyses. If applicable, describe which groupings were chosen and why                                                         | 8                  |
| Statistical methods          | 12     | (a) Describe all statistical methods, including those used to control for confounding                                                                                                | 8                  |
|                              |        | (b) Describe any methods used to examine subgroups and interactions                                                                                                                  | 8                  |
|                              |        | (c) Explain how missing data were addressed                                                                                                                                          | 8                  |
|                              |        | (d) If applicable, explain how loss to follow-up was addressed                                                                                                                       | NA                 |
|                              |        | (e) Describe any sensitivity analyses                                                                                                                                                | NA                 |
| <b>Results</b>               |        |                                                                                                                                                                                      |                    |

|                          |     |                                                                                                                                                                                                              |          |
|--------------------------|-----|--------------------------------------------------------------------------------------------------------------------------------------------------------------------------------------------------------------|----------|
| Participants             | 13* | (a) Report numbers of individuals at each stage of study—eg numbers potentially eligible, examined for eligibility, confirmed eligible, included in the study, completing follow-up, and analysed            | 10       |
|                          |     | (b) Give reasons for non-participation at each stage                                                                                                                                                         | NA       |
|                          |     | (c) Consider use of a flow diagram                                                                                                                                                                           | NA       |
| Descriptive data         | 14* | (a) Give characteristics of study participants (eg demographic, clinical, social) and information on exposures and potential confounders                                                                     | Table 1  |
|                          |     | (b) Indicate number of participants with missing data for each variable of interest                                                                                                                          | NA       |
|                          |     | (c) Summarise follow-up time (eg, average and total amount)                                                                                                                                                  | NA       |
| Outcome data             | 15* | Report numbers of outcome events or summary measures over time                                                                                                                                               | NA       |
| Main results             | 16  | (a) Give unadjusted estimates and, if applicable, confounder-adjusted estimates and their precision (eg, 95% confidence interval). Make clear which confounders were adjusted for and why they were included | NA       |
|                          |     | (b) Report category boundaries when continuous variables were categorized                                                                                                                                    | NA       |
|                          |     | (c) If relevant, consider translating estimates of relative risk into absolute risk for a meaningful time period                                                                                             | NA       |
| Other analyses           | 17  | Report other analyses done—eg analyses of subgroups and interactions, and sensitivity analyses                                                                                                               | NA       |
| <b>Discussion</b>        |     |                                                                                                                                                                                                              |          |
| Key results              | 18  | Summarise key results with reference to study objectives                                                                                                                                                     | 13       |
| <b>Limitations</b>       |     |                                                                                                                                                                                                              |          |
| Interpretation           | 20  | Give a cautious overall interpretation of results considering objectives, limitations, multiplicity of analyses, results from similar studies, and other relevant evidence                                   | 13.14.15 |
| Generalisability         | 21  | Discuss the generalisability (external validity) of the study results                                                                                                                                        | 15       |
| <b>Other information</b> |     |                                                                                                                                                                                                              |          |
| Funding                  | 22  | Give the source of funding and the role of the funders for the present study and, if applicable, for the original study on which the present article is based                                                | 16       |

\*Give information separately for cases and controls in case-control studies and, if applicable, for exposed and unexposed groups in cohort and cross-sectional studies.

**Note:** An Explanation and Elaboration article discusses each checklist item and gives methodological background and published examples of transparent reporting. The STROBE checklist is best used in conjunction with this article (freely available on the Web sites of PLoS Medicine at <http://www.plosmedicine.org/>, Annals of Internal Medicine at <http://www.annals.org/>, and Epidemiology at <http://www.epidem.com/>). Information on the STROBE Initiative is available at [www.strobe-statement.org](http://www.strobe-statement.org).
